# Supplementary material
Source: PubMed Central journal article supplement (PMC5056636)

**Supplementary Figure 1: Discovery SNV-BP associations in Europeans and South Asians (EUR\_SAS).**

Results are provided for (a) transformed SBP (b) transformed DBP (c) transformed PP and (d) HTN in the European and South Asian (EUR\_SAS) discovery samples. The y-axis represents  $-\log_{10}P$  for association. Red triangles represent variants that map to one of the 81 regions selected for replication, blue triangles represent SNVs that map to previously published BP regions, and grey triangles represent all remaining SNVs. SNVs are ordered according to chromosome (black lines on the outside of the plot) and physical position. Genes that SNVs map to are given in the outer blocks.

(a)

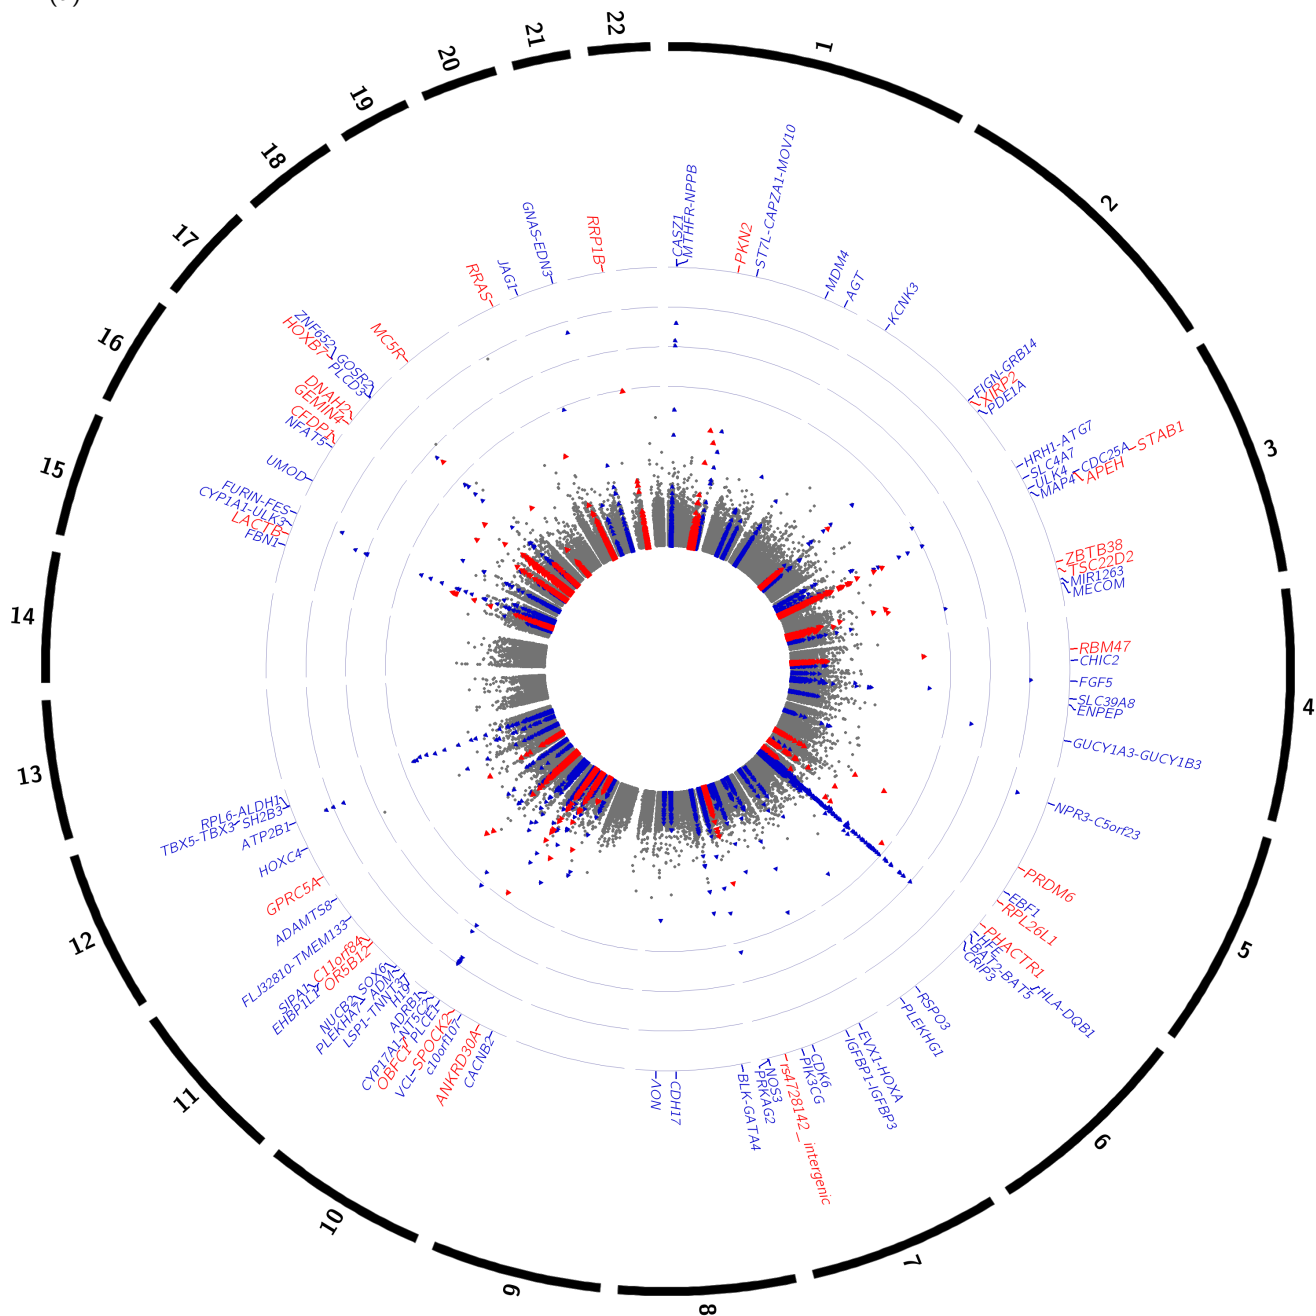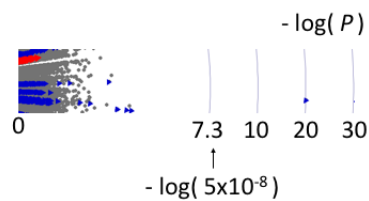



(c)

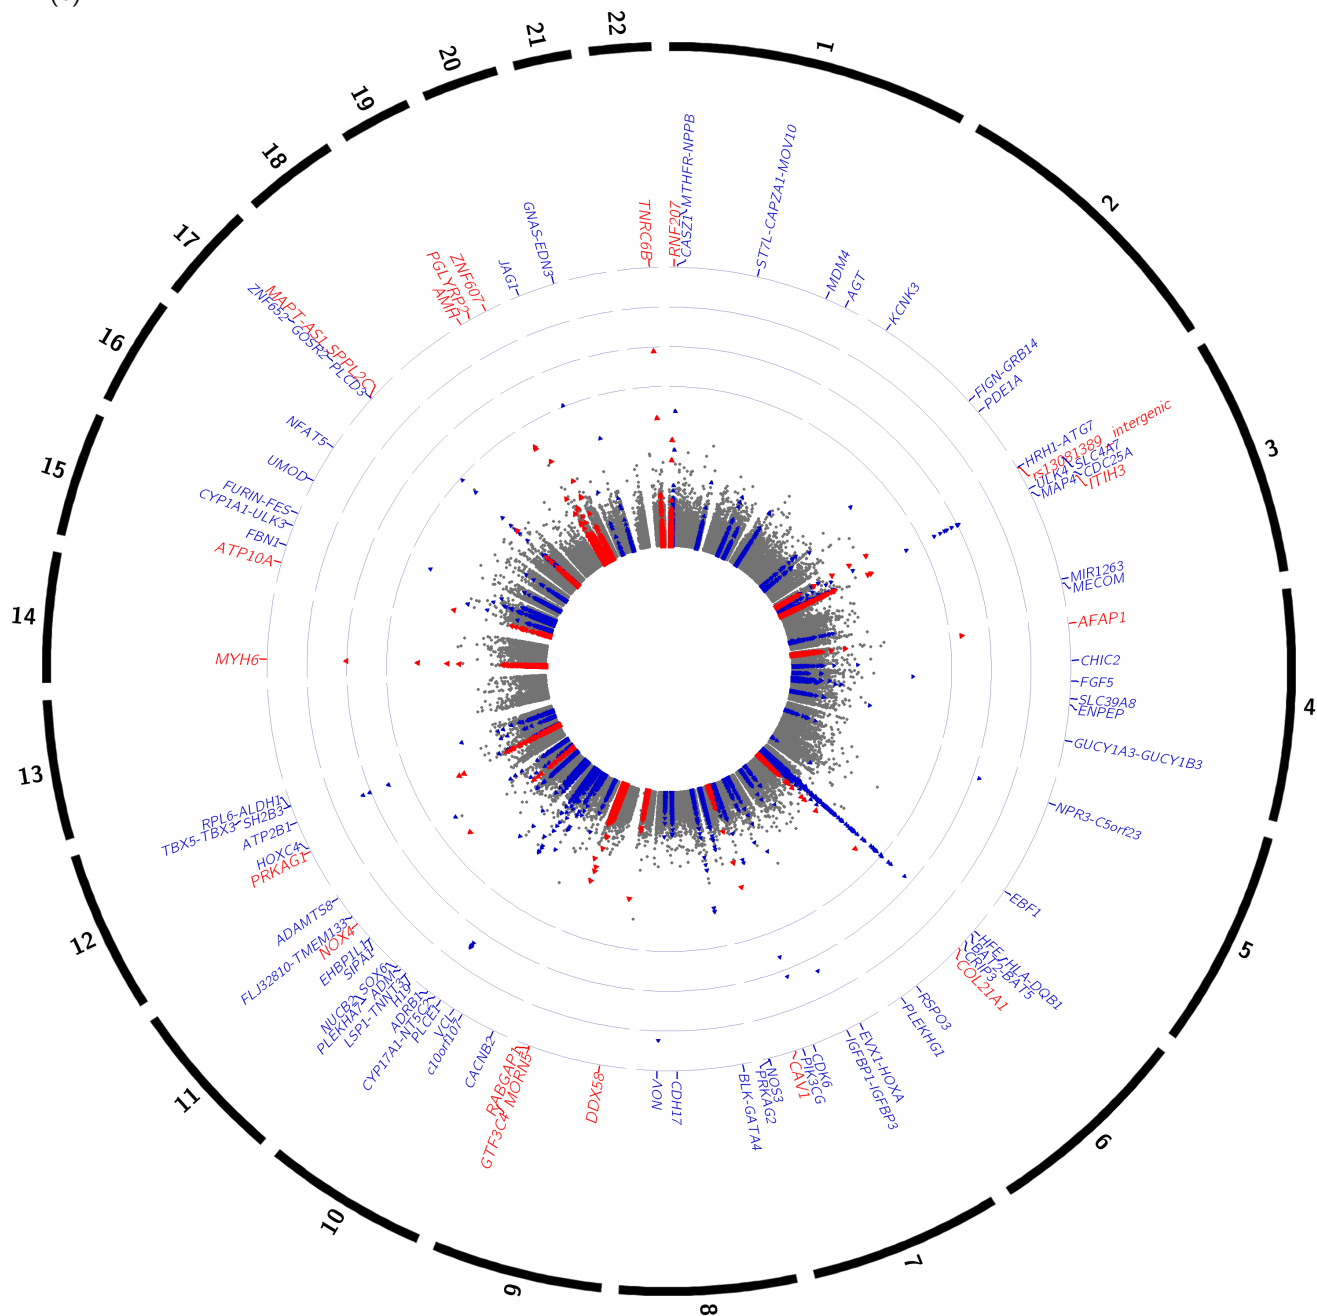



(d)

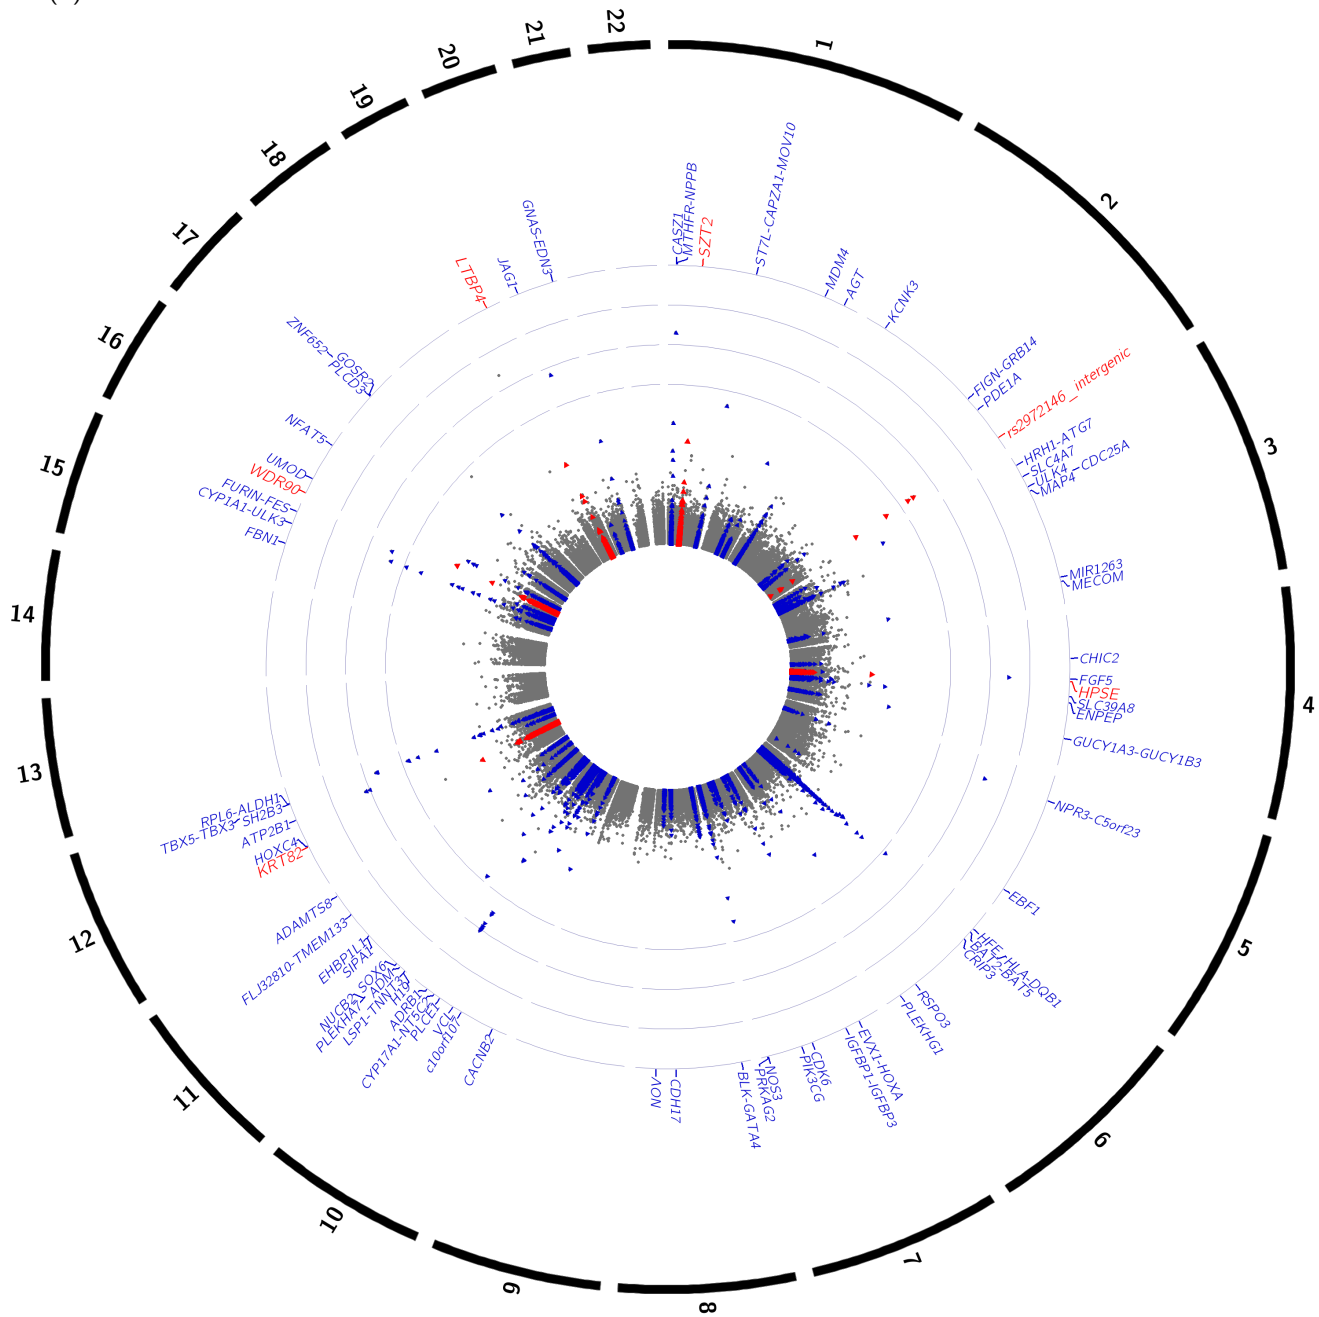

**Supplementary Figure 2: Discovery SNV-BP associations in Europeans (EUR).**

Results are provided for (a) transformed SBP (b) transformed DBP (c) transformed PP and (d) HTN in the European (EUR) discovery samples. The y-axis represents  $-\log_{10}P$  for association. Red triangles represent variants that map to one of the 81 regions selected for replication, blue triangles represent SNVs that map to previously published BP regions, and grey triangles represent all remaining SNVs. SNVs are ordered according to chromosome (black lines on the outside of the plot) and physical position. Genes that SNVs map to are given in the outer blocks.







(d)

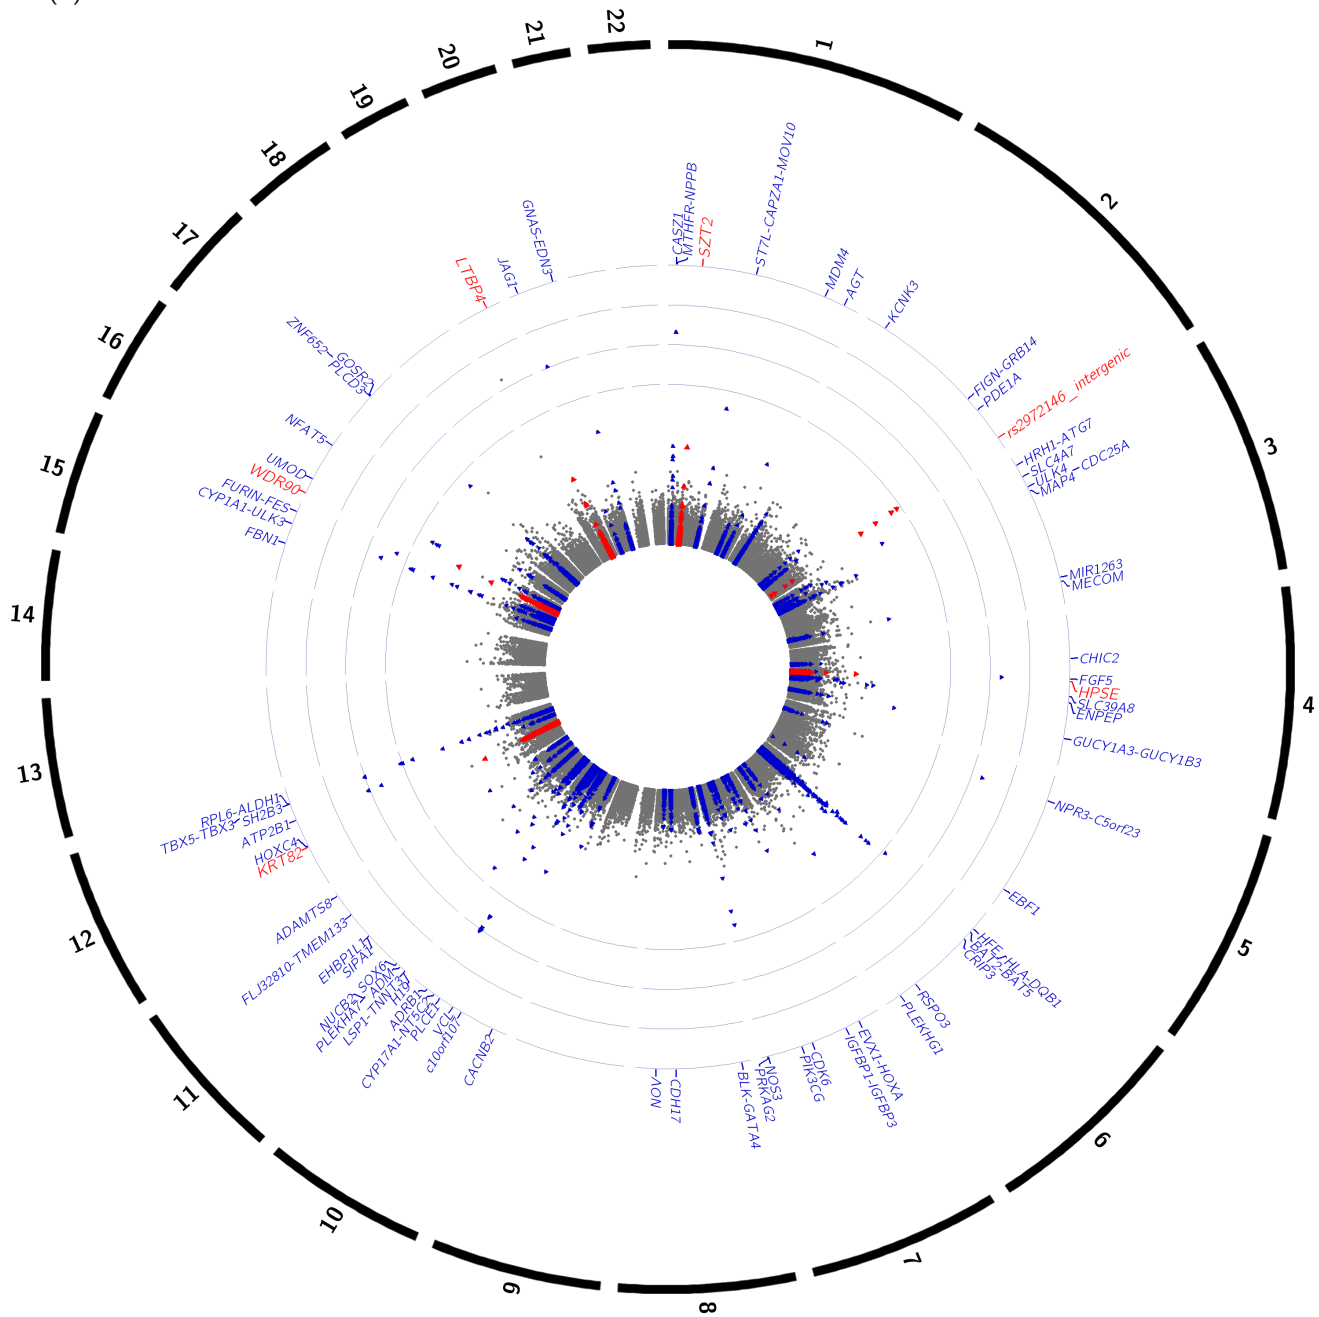

**Supplementary Figure 3. Forest plots of novel BP variants.**

The discovery results for each novel variant and contributing study is shown. The estimates refer to results of the transformed analysis of SBP, DBP and PP traits. The title per plot indicates the SNV, BP trait and ancestry of the estimates, where the ancestry is either European (EUR) or European and South Asian (ALL). The three consortia are indicated as grey for ExomeBP, gold for GoT2D and blue for CHD Exome+. The tables include information on study name, sample size (N), effect size with sign (Beta), standard error of beta and P-value. The meta-analysis results were from a fixed effect meta-analysis with inverse N weights using METAL.

rs709209 in RNF207 association with PP in EUR

| Study Name            | N      | Beta     | SE     | P-value   |
|-----------------------|--------|----------|--------|-----------|
| AIRWAVE               | 1902   | 0.044    | 0.035  | 0.20      |
| ASCOT_SC              | 2461   | -0.0012  | 0.031  | 0.97      |
| ASCOT_UK              | 3245   | 0.018    | 0.026  | 0.49      |
| 1958BC                | 5861   | 0.017    | 0.020  | 0.39      |
| BRIGHT CASES          | 1105   | -0.017   | 0.044  | 0.70      |
| BRIGHT CONTROLS       | 127    | -0.13    | 0.15   | 0.37      |
| CROATIA-Korcula       | 824    | 0.086    | 0.053  | 0.10      |
| DIABNORD (GLACIER)    | 912    | 0.10     | 0.050  | 0.044     |
| EGCUT                 | 1785   | 0.0072   | 0.038  | 0.85      |
| FENLAND controls      | 1170   | 0.027    | 0.043  | 0.54      |
| FINRISK97/02          | 5152   | 0.0052   | 0.022  | 0.81      |
| GS-SFHS               | 9828   | 0.032    | 0.016  | 0.042     |
| GLACIER controls      | 922    | 0.061    | 0.051  | 0.23      |
| GODARTS_diabetics     | 2657   | 0.075    | 0.029  | 0.0098    |
| GODARTS_non diabetics | 2061   | 0.017    | 0.033  | 0.61      |
| GRAPHIC               | 1899   | -0.014   | 0.037  | 0.70      |
| HELICMANOLIS          | 961    | -0.030   | 0.047  | 0.52      |
| HUNT                  | 4735   | 0.055    | 0.022  | 0.011     |
| LBC1921               | 359    | 0.0069   | 0.079  | 0.93      |
| LBC1936               | 783    | -0.078   | 0.054  | 0.15      |
| LIFELINES             | 1948   | 0.041    | 0.034  | 0.23      |
| MDC                   | 8320   | -0.0029  | 0.016  | 0.86      |
| NFBC1986              | 1887   | 0.034    | 0.035  | 0.32      |
| OB                    | 4440   | -0.016   | 0.022  | 0.47      |
| PIVUS/ULSAM           | 1998   | -0.032   | 0.034  | 0.34      |
| TwinsUK               | 1014   | -0.075   | 0.047  | 0.11      |
| UKHLS                 | 7240   | 0.027    | 0.017  | 0.11      |
| ADDITION              | 2309   | 0.012    | 0.030  | 0.70      |
| DPS                   | 416    | 0.044    | 0.074  | 0.55      |
| DR's EXTRA            | 739    | -0.031   | 0.058  | 0.59      |
| FIN-D2D 2007          | 2570   | 0.031    | 0.031  | 0.14      |
| FINRISK 2007          | 1088   | -0.053   | 0.046  | 0.26      |
| FUSION                | 4237   | 0.015    | 0.024  | 0.52      |
| Health 2006/2008      | 3709   | 0.047    | 0.024  | 0.052     |
| Inter99               | 6077   | 0.030    | 0.019  | 0.13      |
| METSIM                | 8388   | 0.049    | 0.017  | 0.77      |
| PPP                   | 4766   | 0.040    | 0.023  | 0.080     |
| SDC                   | 499    | 0.067    | 0.067  | 0.32      |
| SDR/ANDIS             | 2634   | 0.051    | 0.029  | 0.079     |
| VeijleCases           | 2000   | -0.016   | 0.034  | 0.63      |
| VeijleCtrl            | 430    | 0.0083   | 0.071  | 0.91      |
| CCHS                  | 8070   | 0.022    | 0.014  | 0.12      |
| CGPS                  | 11782  | 0.018    | 0.012  | 0.14      |
| CIHDS                 | 1434   | -0.032   | 0.039  | 0.41      |
| EPIC-CVD              | 15673  | -0.00088 | 0.011  | 0.94      |
| EPIC-InterAct         | 1077   | -0.032   | 0.045  | 0.48      |
| MORGAM                | 5757   | 0.0026   | 0.019  | 0.89      |
| PROSPER               | 1275   | 0.021    | 0.042  | 0.62      |
| WOSCOPS               | 1337   | 0.066    | 0.041  | 0.11      |
| Summary               | 161861 | 0.016    | 0.0036 | 1.728e-05 |

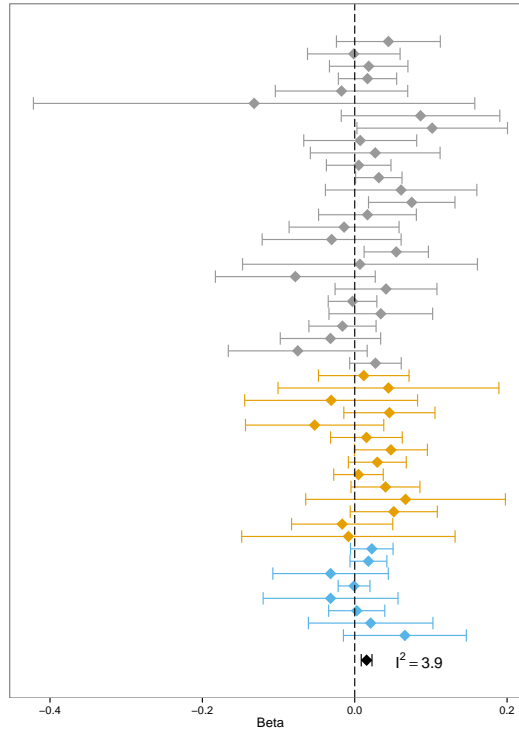

rs16851397 in ZBTB38 association with DBP in EUR

| Study Name            | N      | Beta    | SE     | P-value   |
|-----------------------|--------|---------|--------|-----------|
| AIRWAVE               | 1902   | 0.095   | 0.076  | 0.21      |
| ASCOT_SC              | 2460   | -0.030  | 0.065  | 0.65      |
| ASCOT_UK              | 3245   | 0.063   | 0.057  | 0.27      |
| 1958BC                | 5864   | -0.041  | 0.044  | 0.34      |
| BRIGHT CASES          | 1105   | -0.18   | 0.098  | 0.069     |
| BRIGHT CONTROLS       | 127    | -0.020  | 0.40   | 0.96      |
| CROATIA-Korcula       | 826    | -0.14   | 0.13   | 0.28      |
| DIABNORD (GLACIER)    | 912    | -0.25   | 0.13   | 0.054     |
| EGCUT                 | 1785   | 0.065   | 0.094  | 0.49      |
| FENLAND controls      | 1170   | -0.10   | 0.093  | 0.28      |
| FINRISK97/02          | 5153   | -0.11   | 0.057  | 0.044     |
| GS-SFHS               | 9827   | 0.0070  | 0.035  | 0.84      |
| GLACIER controls      | 922    | -0.077  | 0.11   | 0.49      |
| GODARTS_diabetics     | 2657   | -0.0025 | 0.068  | 0.97      |
| GODARTS_non diabetics | 2061   | -0.13   | 0.073  | 0.064     |
| GRAPHIC               | 1899   | -0.17   | 0.078  | 0.027     |
| HELICMANOLIS          | 961    | 0.044   | 0.23   | 0.85      |
| HUNT                  | 4735   | -0.070  | 0.043  | 0.10      |
| LBC1921               | 359    | -0.076  | 0.17   | 0.65      |
| LBC1936               | 783    | -0.12   | 0.11   | 0.26      |
| LIFELINES             | 1948   | -0.13   | 0.064  | 0.049     |
| MDC                   | 8318   | 0.0096  | 0.037  | 0.79      |
| NFBC1986              | 1887   | -0.036  | 0.083  | 0.66      |
| OB                    | 4440   | -0.096  | 0.051  | 0.057     |
| PIVUS/ULSAM           | 1998   | 0.028   | 0.072  | 0.70      |
| TwinsUK               | 1014   | -0.13   | 0.059  | 0.18      |
| UKHLS                 | 7240   | -0.0019 | 0.040  | 0.96      |
| ADDITION              | 2310   | -0.056  | 0.067  | 0.40      |
| DPS                   | 416    | -0.075  | 0.19   | 0.70      |
| DR's EXTRA            | 739    | -0.20   | 0.22   | 0.32      |
| FIN-D2D 2007          | 2570   | 0.021   | 0.075  | 0.78      |
| FINRISK 2007          | 1088   | 0.082   | 0.13   | 0.53      |
| FUSION                | 4237   | -0.033  | 0.064  | 0.60      |
| Health 2006/2008      | 3709   | -0.049  | 0.050  | 0.33      |
| Inter99               | 6078   | -0.027  | 0.040  | 0.50      |
| METSIM                | 8388   | -0.058  | 0.048  | 0.22      |
| PPP                   | 4766   | 0.017   | 0.051  | 0.74      |
| SDC                   | 500    | 0.040   | 0.16   | 0.80      |
| SDR/ANDIS             | 2636   | 0.020   | 0.065  | 0.76      |
| VeijleCases           | 2006   | -0.077  | 0.068  | 0.26      |
| VeijleCtrl            | 431    | 0.13    | 0.14   | 0.38      |
| CCHS                  | 8070   | 0.045   | 0.031  | 0.15      |
| CGPS                  | 11783  | -0.084  | 0.026  | 0.00098   |
| CIHDS                 | 1434   | -0.033  | 0.082  | 0.69      |
| EPIC-CVD              | 15674  | -0.053  | 0.026  | 0.041     |
| EPIC-InterAct         | 1078   | 0.071   | 0.11   | 0.51      |
| MORGAM                | 5757   | 0.041   | 0.046  | 0.37      |
| PROSPER               | 1275   | -0.0013 | 0.092  | 0.99      |
| WOSCOPS               | 1337   | 0.034   | 0.088  | 0.70      |
| Summary               | 161880 | -0.032  | 0.0082 | 0.0001023 |

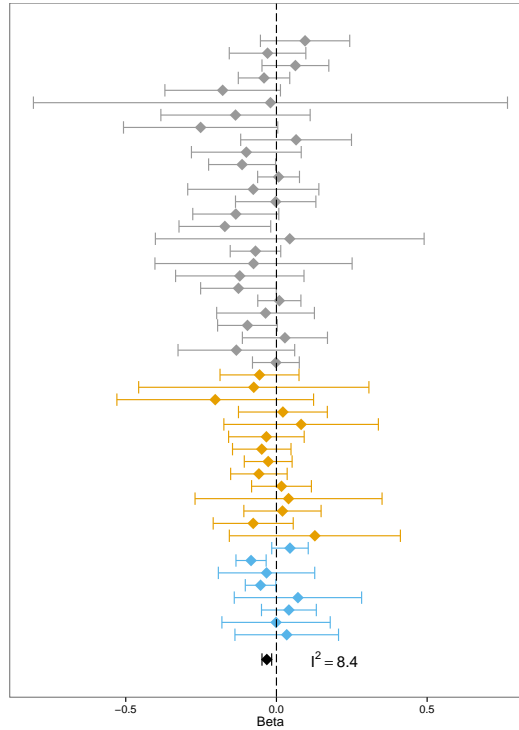

rs2972146 in 2q36.3 association with DBP in EUR

| Study Name            | N      | Beta    | SE     | P-value   |
|-----------------------|--------|---------|--------|-----------|
| AIRWAVE               | 1902   | 0.020   | 0.034  | 0.55      |
| ASCOT_SC              | 2459   | 0.025   | 0.029  | 0.32      |
| ASCOT_UK              | 3245   | -0.027  | 0.026  | 0.29      |
| 1958BC                | 5864   | 0.024   | 0.020  | 0.21      |
| BRIGHT CASES          | 1105   | 0.030   | 0.045  | 0.50      |
| BRIGHT CONTROLS       | 127    | 0.034   | 0.14   | 0.81      |
| CROATIA-Korcula       | 822    | 0.074   | 0.055  | 0.18      |
| DIABNORD (GLACIER)    | 912    | 0.036   | 0.050  | 0.48      |
| EGCUT                 | 1785   | 0.022   | 0.035  | 0.54      |
| FENLAND controls      | 1170   | 0.010   | 0.043  | 0.82      |
| FINRISK97/02          | 5152   | -0.017  | 0.020  | 0.40      |
| GS-SFHS               | 9828   | 0.028   | 0.016  | 0.077     |
| GLACIER controls      | 922    | -0.038  | 0.046  | 0.41      |
| GODARTS_diabetics     | 2657   | -0.0093 | 0.029  | 0.75      |
| GODARTS_non diabetics | 2061   | 0.057   | 0.033  | 0.082     |
| GRAPHIC               | 1899   | -0.0044 | 0.037  | 0.90      |
| HELICMANOLIS          | 961    | 0.046   | 0.048  | 0.34      |
| HUNT                  | 4735   | -0.013  | 0.021  | 0.55      |
| LBC1921               | 359    | 0.016   | 0.078  | 0.84      |
| LBC1936               | 783    | 0.088   | 0.053  | 0.10      |
| LIFELINES             | 1948   | 0.040   | 0.034  | 0.24      |
| MDC                   | 8306   | -0.0047 | 0.016  | 0.77      |
| NFBC1986              | 1887   | 0.012   | 0.032  | 0.72      |
| OB                    | 4440   | 0.058   | 0.022  | 0.0088    |
| PIVUS/ULSAM           | 1998   | 0.028   | 0.033  | 0.40      |
| TwinsUK               | 1014   | 0.041   | 0.046  | 0.76      |
| UKHLS                 | 7240   | -0.0069 | 0.017  | 0.69      |
| ADDITION              | 2310   | 0.064   | 0.031  | 0.039     |
| DPS                   | 416    | -0.055  | 0.075  | 0.46      |
| DR's EXTRA            | 739    | 0.053   | 0.053  | 0.32      |
| FIN-D2D 2007          | 2570   | 0.0089  | 0.029  | 0.76      |
| FINRISK 2007          | 1088   | -0.028  | 0.045  | 0.53      |
| FUSION                | 4237   | 0.019   | 0.022  | 0.40      |
| Health 2006/2008      | 3705   | -0.0049 | 0.024  | 0.84      |
| Inter99               | 6075   | 0.040   | 0.019  | 0.030     |
| METSIM                | 8388   | 0.023   | 0.016  | 0.016     |
| PPP                   | 4766   | 0.021   | 0.021  | 0.32      |
| SDC                   | 499    | 0.046   | 0.068  | 0.50      |
| SDR/ANDIS             | 2636   | 0.062   | 0.029  | 0.031     |
| VeijleCases           | 2005   | 0.037   | 0.033  | 0.27      |
| VeijleCtrl            | 430    | -0.032  | 0.071  | 0.65      |
| CCHS                  | 8070   | 0.033   | 0.015  | 0.031     |
| CGPS                  | 11783  | -0.0071 | 0.026  | 0.79      |
| CIHDS                 | 1434   | 0.042   | 0.038  | 0.27      |
| EPIC-CVD              | 15674  | 0.037   | 0.011  | 0.00077   |
| EPIC-InterAct         | 1077   | 0.041   | 0.045  | 0.75      |
| MORGAM                | 5757   | 0.0046  | 0.018  | 0.80      |
| PROSPER               | 1275   | 0.052   | 0.040  | 0.19      |
| WOSCOPS               | 1337   | -0.0046 | 0.040  | 0.91      |
| Summary               | 161853 | 0.020   | 0.0037 | 1.757e-07 |

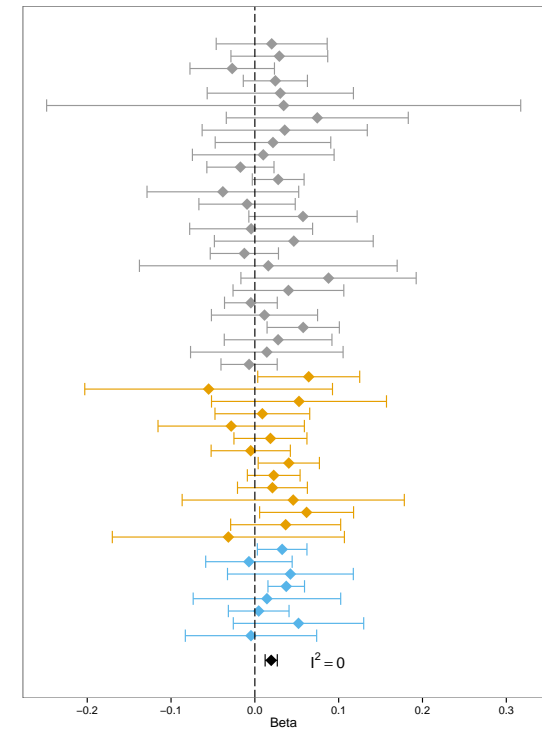

rs1008058 in PRDM6 association with SBP in EUR

| Study Name            | N      | Beta    | SE     | P-value   |
|-----------------------|--------|---------|--------|-----------|
| AIRWAVE               | 1902   | 0.0082  | 0.052  | 0.87      |
| ASCOT_SC              | 2461   | -0.010  | 0.042  | 0.80      |
| ASCOT_UK              | 3245   | 0.015   | 0.039  | 0.70      |
| 1958BC                | 5864   | 0.072   | 0.029  | 0.014     |
| BRIGHT CASES          | 1105   | 0.019   | 0.065  | 0.77      |
| BRIGHT CONTROLS       | 127    | 0.18    | 0.22   | 0.43      |
| CROATIA-Korcula       | 820    | -0.10   | 0.077  | 0.18      |
| DIABNORD (GLACIER)    | 912    | 0.019   | 0.058  | 0.74      |
| EGCUT                 | 1785   | 0.030   | 0.047  | 0.53      |
| GLACIER controls      | 922    | 0.046   | 0.057  | 0.42      |
| GODARTS_diabetics     | 2657   | 0.047   | 0.043  | 0.27      |
| GODARTS_non diabetics | 2061   | 0.12    | 0.052  | 0.021     |
| GRAPHIC               | 1899   | 0.11    | 0.055  | 0.042     |
| HELICMANOLIS          | 961    | -0.035  | 0.071  | 0.62      |
| HUNT                  | 4735   | 0.015   | 0.030  | 0.62      |
| LBC1921               | 359    | 0.053   | 0.11   | 0.63      |
| LBC1936               | 782    | -0.065  | 0.073  | 0.37      |
| LIFELINES             | 1948   | 0.047   | 0.054  | 0.38      |
| NFBC1986              | 1887   | 0.016   | 0.041  | 0.69      |
| OB                    | 4440   | 0.057   | 0.033  | 0.086     |
| PIVUS/ULSAM           | 1998   | 0.084   | 0.044  | 0.057     |
| TwinsUK               | 1014   | 0.12    | 0.066  | 0.079     |
| UKHLS                 | 7240   | 0.058   | 0.027  | 0.00034   |
| ADDITION              | 2310   | 0.030   | 0.047  | 0.53      |
| DPS                   | 416    | 0.024   | 0.098  | 0.80      |
| DR's EXTRA            | 739    | -0.061  | 0.072  | 0.40      |
| FIN-D2D 2007          | 2570   | 0.032   | 0.040  | 0.42      |
| FINRISK 2007          | 1088   | -0.0031 | 0.058  | 0.96      |
| FUSION                | 4237   | 0.0053  | 0.030  | 0.86      |
| Health 2006/2008      | 3709   | 0.083   | 0.036  | 0.023     |
| Inter99               | 6080   | 0.018   | 0.029  | 0.53      |
| METSIM                | 8388   | 0.050   | 0.022  | 0.020     |
| PPP                   | 4766   | 0.047   | 0.031  | 0.12      |
| SDC                   | 500    | -0.029  | 0.10   | 0.78      |
| VeijleCases           | 2000   | -0.0055 | 0.051  | 0.91      |
| VeijleCtrl            | 430    | -0.033  | 0.11   | 0.77      |
| CCHS                  | 8070   | 0.038   | 0.020  | 0.060     |
| CGPS                  | 11784  | 0.013   | 0.018  | 0.45      |
| CIHDS                 | 1436   | -0.097  | 0.056  | 0.082     |
| EPIC-CVD              | 15676  | 0.0036  | 0.015  | 0.81      |
| EPIC-InterAct         | 1077   | 0.0048  | 0.068  | 0.94      |
| MORGAM                | 5757   | 0.025   | 0.025  | 0.32      |
| WOSCOPS               | 1337   | 0.054   | 0.060  | 0.37      |
| Summary               | 133492 | 0.029   | 0.0056 | 2.692e-07 |

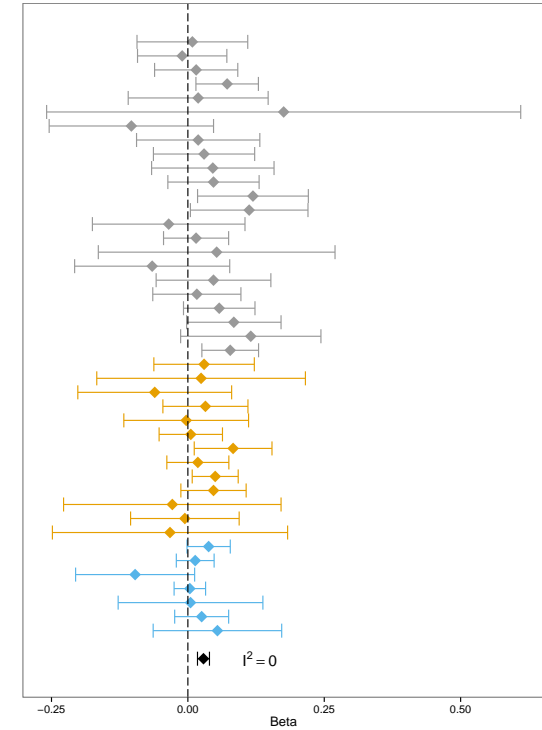



rs12521868 in *c5orf56* association with DBP in EUR

| Study Name            | N      | Beta    | SE     | P-value   |
|-----------------------|--------|---------|--------|-----------|
| AIRWAVE               | 1838   | -0.050  | 0.032  | 0.13      |
| ASCOT_SC              | 2461   | -0.054  | 0.029  | 0.064     |
| ASCOT_UK              | 3236   | 0.015   | 0.025  | 0.55      |
| 1958BC                | 5864   | -0.013  | 0.019  | 0.48      |
| BRIGHT CASES          | 1105   | 0.0062  | 0.044  | 0.89      |
| BRIGHT CONTROLS       | 127    | 0.29    | 0.13   | 0.023     |
| CROATIA-Korcula       | 821    | 0.0014  | 0.052  | 0.98      |
| DIABNORD (GLACIER)    | 912    | -0.029  | 0.050  | 0.56      |
| EGCUT                 | 1783   | 0.0071  | 0.036  | 0.84      |
| FENLAND controls      | 1170   | -0.019  | 0.041  | 0.64      |
| FINRISK97/02          | 5153   | -0.047  | 0.021  | 0.030     |
| GS-SFHS               | 9827   | -0.017  | 0.015  | 0.26      |
| GLACIER controls      | 919    | -0.075  | 0.048  | 0.12      |
| GODARTS_diabetics     | 2657   | -0.020  | 0.027  | 0.47      |
| GODARTS_non diabetics | 2061   | -0.010  | 0.032  | 0.75      |
| GRAPHIC               | 1899   | -0.020  | 0.036  | 0.58      |
| HELICMANOLIS          | 959    | 0.040   | 0.051  | 0.43      |
| HUNT                  | 4735   | 0.0067  | 0.021  | 0.74      |
| LBC1921               | 359    | 0.030   | 0.079  | 0.71      |
| LBC1936               | 783    | 0.018   | 0.049  | 0.71      |
| LIFELINES             | 1945   | 0.072   | 0.033  | 0.030     |
| MDC                   | 8316   | -0.022  | 0.016  | 0.15      |
| NFBC1986              | 1887   | -0.054  | 0.034  | 0.11      |
| OB                    | 4440   | -0.077  | 0.022  | 0.00039   |
| PIVUS/ULSAM           | 1998   | -0.040  | 0.032  | 0.21      |
| TwinsUK               | 1014   | 0.016   | 0.045  | 0.73      |
| UKHLS                 | 7240   | -0.012  | 0.017  | 0.47      |
| ADDITION              | 2310   | -0.072  | 0.029  | 0.014     |
| DPS                   | 416    | 0.0094  | 0.075  | 0.90      |
| DR's EXTRA            | 737    | -0.034  | 0.056  | 0.54      |
| FIN-D2D 2007          | 2568   | -0.035  | 0.031  | 0.26      |
| FINRISK 2007          | 1085   | -0.11   | 0.048  | 0.019     |
| FUSION                | 4227   | -0.0085 | 0.023  | 0.72      |
| Health 2006/2008      | 3709   | 0.023   | 0.024  | 0.33      |
| Inter99               | 6078   | 0.0015  | 0.018  | 0.93      |
| METSIM                | 8389   | -0.016  | 0.017  | 0.32      |
| PPP                   | 4766   | -0.021  | 0.022  | 0.34      |
| SDC                   | 500    | -0.17   | 0.066  | 0.0095    |
| VejeCases             | 2006   | -0.0074 | 0.033  | 0.82      |
| VejeCtri              | 431    | 0.0095  | 0.071  | 0.89      |
| CCHS                  | 8070   | -0.023  | 0.015  | 0.13      |
| CGPS                  | 11783  | -0.022  | 0.013  | 0.092     |
| CIHDS                 | 1434   | -0.0028 | 0.038  | 0.94      |
| EPIC-CVD              | 15674  | -0.010  | 0.011  | 0.36      |
| EPIC-InterAct         | 1076   | 0.0178  | 0.044  | 0.76      |
| MORGAM                | 5757   | -0.020  | 0.018  | 0.28      |
| PROSPER               | 1275   | 0.0069  | 0.039  | 0.86      |
| WOSCOPS               | 1337   | -0.063  | 0.038  | 0.098     |
| Summary               | 159198 | -0.018  | 0.0036 | 9.442e-07 |

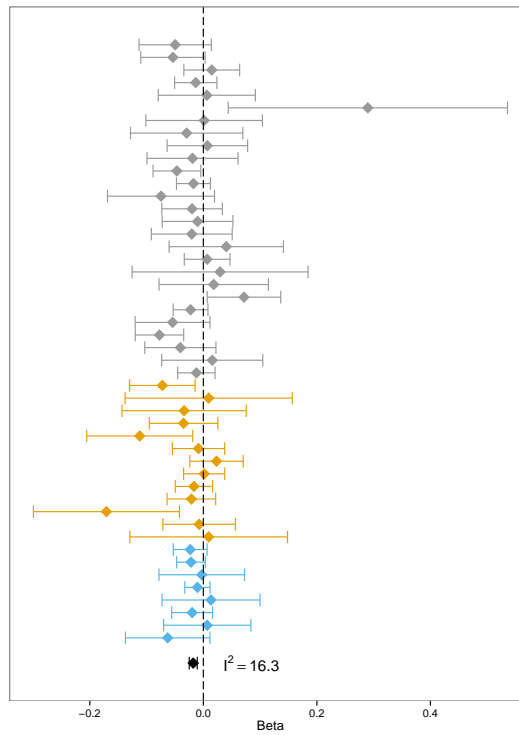rs9349379 in *PHACTR1* association with SBP in EUR

| Study Name            | N      | Beta     | SE     | P-value   |
|-----------------------|--------|----------|--------|-----------|
| AIRWAVE               | 1902   | 0.028    | 0.034  | 0.41      |
| ASCOT_SC              | 2459   | 0.051    | 0.029  | 0.076     |
| ASCOT_UK              | 3245   | 0.035    | 0.025  | 0.17      |
| 1958BC                | 5864   | 0.0030   | 0.019  | 0.87      |
| BRIGHT CASES          | 1105   | -0.018   | 0.044  | 0.68      |
| BRIGHT CONTROLS       | 127    | -0.0061  | 0.14   | 0.96      |
| CROATIA-Korcula       | 823    | 0.0020   | 0.052  | 0.97      |
| DIABNORD (GLACIER)    | 912    | 0.0083   | 0.048  | 0.86      |
| EGCUT                 | 1785   | 0.026    | 0.034  | 0.44      |
| FENLAND controls      | 1170   | 0.039    | 0.042  | 0.36      |
| FINRISK97/02          | 5149   | 0.038    | 0.020  | 0.057     |
| GS-SFHS               | 9829   | 0.0029   | 0.015  | 0.85      |
| GLACIER controls      | 922    | 0.12     | 0.045  | 0.0098    |
| GODARTS_diabetics     | 2657   | -0.015   | 0.028  | 0.58      |
| GODARTS_non diabetics | 2061   | 0.012    | 0.031  | 0.70      |
| GRAPHIC               | 1898   | -0.0095  | 0.035  | 0.79      |
| HELICMANOLIS          | 961    | 0.18     | 0.051  | 0.00044   |
| HUNT                  | 4735   | -0.00066 | 0.020  | 0.97      |
| LBC1921               | 359    | 0.0023   | 0.074  | 0.98      |
| LBC1936               | 783    | 0.0096   | 0.054  | 0.86      |
| LIFELINES             | 1948   | -0.034   | 0.033  | 0.30      |
| MDC                   | 8313   | 0.0055   | 0.016  | 0.73      |
| NFBC1986              | 1887   | -0.0071  | 0.032  | 0.83      |
| OB                    | 4440   | 0.033    | 0.022  | 0.12      |
| PIVUS/ULSAM           | 1998   | 0.031    | 0.032  | 0.33      |
| TwinsUK               | 1014   | 0.065    | 0.045  | 0.15      |
| UKHLS                 | 7238   | 0.028    | 0.017  | 0.094     |
| ADDITION              | 2310   | 0.0096   | 0.030  | 0.75      |
| DPS                   | 416    | 0.14     | 0.068  | 0.044     |
| DR's EXTRA            | 739    | -0.043   | 0.051  | 0.40      |
| FIN-D2D 2007          | 2570   | 0.028    | 0.027  | 0.30      |
| FINRISK 2007          | 1088   | -0.018   | 0.044  | 0.68      |
| FUSION                | 4237   | 0.014    | 0.022  | 0.51      |
| Health 2006/2008      | 3709   | 0.032    | 0.024  | 0.18      |
| Inter99               | 6080   | 0.028    | 0.018  | 0.13      |
| METSIM                | 8388   | 0.033    | 0.016  | 0.033     |
| PPP                   | 4766   | 0.039    | 0.021  | 0.061     |
| SDC                   | 500    | -0.056   | 0.063  | 0.37      |
| SDR/ANDIS             | 2636   | -0.016   | 0.028  | 0.57      |
| VejeCases             | 2000   | 0.023    | 0.032  | 0.48      |
| VejeCtri              | 430    | 0.14     | 0.071  | 0.051     |
| CCHS                  | 8070   | 0.035    | 0.013  | 0.0085    |
| CGPS                  | 11784  | 0.013    | 0.012  | 0.27      |
| CIHDS                 | 1436   | -0.044   | 0.037  | 0.23      |
| EPIC-CVD              | 15676  | 0.023    | 0.010  | 0.029     |
| EPIC-InterAct         | 1077   | -0.065   | 0.045  | 0.15      |
| MORGAM                | 5757   | 0.0050   | 0.017  | 0.78      |
| PROSPER               | 1275   | 0.051    | 0.039  | 0.19      |
| WOSCOPS               | 1337   | -0.030   | 0.038  | 0.42      |
| Summary               | 161865 | 0.018    | 0.0035 | 8.093e-08 |

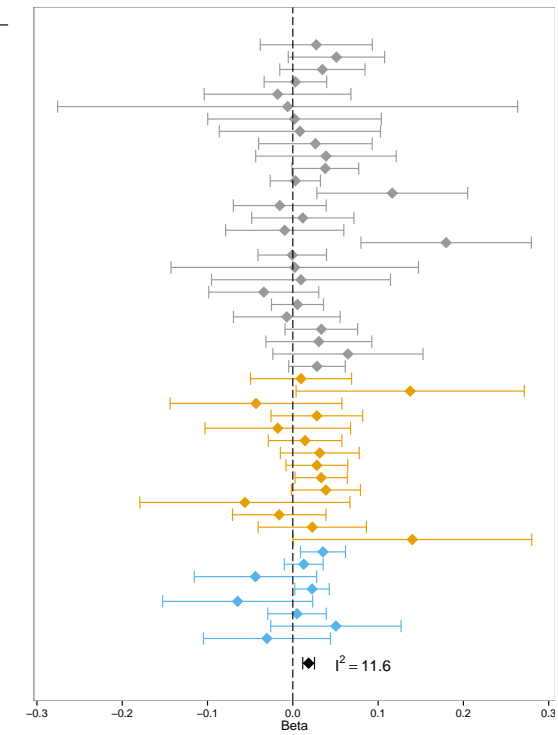rs200999181 in *COL21A1* association with PP in EUR

| Study Name            | N      | Beta   | SE    | P-value   |
|-----------------------|--------|--------|-------|-----------|
| AIRWAVE               | 1902   | -0.44  | 0.70  | 0.53      |
| ASCOT_SC              | 2458   | -0.30  | 1.0   | 0.76      |
| ASCOT_UK              | 3245   | 0.16   | 0.41  | 0.69      |
| 1958BC                | 5861   | 0.15   | 0.22  | 0.48      |
| BRIGHT CASES          | 1105   | 0.35   | 0.41  | 0.40      |
| FENLAND controls      | 1170   | 1.2    | 0.50  | 0.020     |
| FINRISK97/02          | 5152   | 0.36   | 1.0   | 0.72      |
| GS-SFHS               | 9805   | 0.41   | 0.15  | 0.0048    |
| GODARTS_diabetics     | 2657   | 0.34   | 0.30  | 0.25      |
| GODARTS_non diabetics | 2061   | -0.32  | 0.41  | 0.43      |
| GRAPHIC               | 1899   | 1.3    | 0.73  | 0.079     |
| HUNT                  | 4735   | 1.1    | 0.50  | 0.033     |
| LBC1936               | 783    | 0.72   | 1.0   | 0.47      |
| LIFELINES             | 1948   | 0.44   | 0.50  | 0.38      |
| MDC                   | 8307   | 0.57   | 0.30  | 0.058     |
| OB                    | 4440   | 0.19   | 0.26  | 0.47      |
| UKHLS                 | 7238   | 0.35   | 0.19  | 0.067     |
| Health 2006/2008      | 3709   | 1.2    | 0.58  | 0.044     |
| Inter99               | 6077   | -0.13  | 0.41  | 0.75      |
| CCHS                  | 8070   | 1.1    | 0.42  | 0.0074    |
| CGPS                  | 11783  | 0.31   | 0.29  | 0.29      |
| CIHDS                 | 1434   | 0.0051 | 0.67  | 0.99      |
| EPIC-CVD              | 15673  | 0.26   | 0.15  | 0.087     |
| EPIC-InterAct         | 1076   | 0.14   | 0.50  | 0.78      |
| MORGAM                | 5757   | 0.39   | 0.38  | 0.30      |
| PROSPER               | 1275   | 0.99   | 0.44  | 0.026     |
| WOSCOPS               | 1337   | -2.5   | 0.99  | 0.012     |
| Summary               | 120957 | 0.35   | 0.062 | 3.083e-08 |

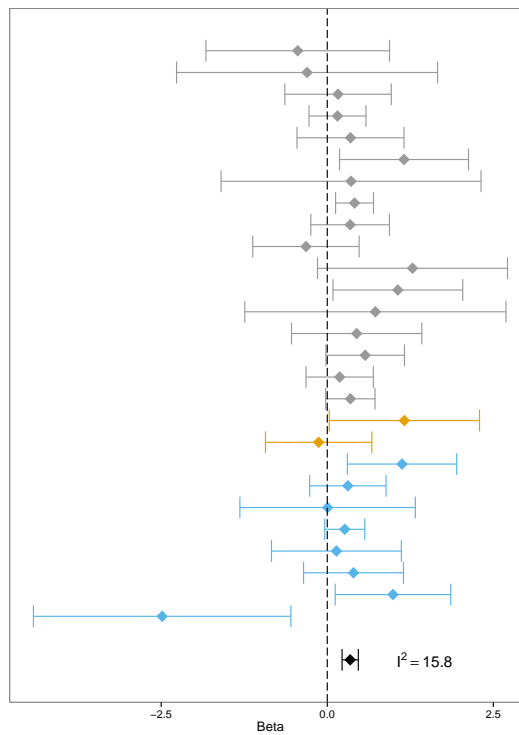rs34591516 in *GPR20* association with SBP in EUR

| Study Name            | N      | Beta    | SE     | P-value   |
|-----------------------|--------|---------|--------|-----------|
| AIRWAVE               | 1902   | -0.21   | 0.078  | 0.0061    |
| ASCOT_SC              | 2459   | 0.064   | 0.058  | 0.27      |
| ASCOT_UK              | 3245   | 0.054   | 0.059  | 0.36      |
| 1958BC                | 5864   | -0.026  | 0.047  | 0.58      |
| BRIGHT CASES          | 1105   | 0.060   | 0.10   | 0.56      |
| BRIGHT CONTROLS       | 127    | 0.041   | 0.44   | 0.93      |
| CROATIA-Korcula       | 827    | 0.011   | 0.10   | 0.91      |
| DIABNORD (GLACIER)    | 912    | -0.034  | 0.090  | 0.71      |
| EGCUT                 | 1785   | 0.066   | 0.075  | 0.38      |
| FENLAND controls      | 1170   | 0.091   | 0.099  | 0.36      |
| FINRISK97/02          | 5151   | 0.067   | 0.041  | 0.11      |
| GS-SFHS               | 9824   | 0.019   | 0.038  | 0.61      |
| GLACIER controls      | 922    | 0.088   | 0.087  | 0.31      |
| GODARTS_diabetics     | 2657   | 0.00016 | 0.066  | 1.0       |
| GODARTS_non diabetics | 2061   | 0.088   | 0.074  | 0.23      |
| GRAPHIC               | 1899   | -0.0086 | 0.083  | 0.92      |
| HELICMANOLIS          | 961    | -0.082  | 0.090  | 0.31      |
| HUNT                  | 4735   | 0.066   | 0.042  | 0.12      |
| LBC1921               | 359    | 0.46    | 0.19   | 0.018     |
| LBC1936               | 783    | 0.14    | 0.12   | 0.26      |
| LIFELINES             | 1948   | 0.036   | 0.080  | 0.65      |
| MDC                   | 8302   | 0.010   | 0.033  | 0.76      |
| NFBC1986              | 1887   | -0.020  | 0.067  | 0.77      |
| OB                    | 4440   | 0.14    | 0.052  | 0.0070    |
| PIVUS/ULSAM           | 1998   | -0.064  | 0.064  | 0.32      |
| TwinsUK               | 1014   | 0.16    | 0.099  | 0.12      |
| UKHLS                 | 7240   | 0.050   | 0.041  | 0.22      |
| ADDITION              | 2310   | -0.087  | 0.087  | 0.19      |
| DPS                   | 416    | 0.23    | 0.15   | 0.13      |
| DR's EXTRA            | 739    | -0.017  | 0.11   | 0.88      |
| FIN-D2D 2007          | 2570   | 0.051   | 0.061  | 0.40      |
| FINRISK 2007          | 1088   | -0.071  | 0.090  | 0.43      |
| FUSION                | 4237   | 0.0077  | 0.045  | 0.87      |
| Health 2006/2008      | 3709   | 0.069   | 0.050  | 0.16      |
| Inter99               | 6080   | 0.089   | 0.039  | 0.023     |
| METSIM                | 8389   | 0.098   | 0.033  | 0.0026    |
| PPP                   | 4766   | 0.082   | 0.041  | 0.046     |
| SDC                   | 500    | -0.14   | 0.16   | 0.38      |
| VejeCases             | 2000   | 0.12    | 0.073  | 0.10      |
| VejeCtri              | 430    | -0.075  | 0.17   | 0.67      |
| CCHS                  | 8070   | -0.023  | 0.029  | 0.43      |
| CGPS                  | 11784  | 0.076   | 0.024  | 0.0017    |
| CIHDS                 | 1436   | -0.13   | 0.087  | 0.15      |
| EPIC-CVD              | 15676  | 0.017   | 0.020  | 0.40      |
| EPIC-InterAct         | 1077   | 0.19    | 0.095  | 0.043     |
| MORGAM                | 5757   | 0.033   | 0.036  | 0.36      |
| PROSPER               | 1275   | 0.099   | 0.11   | 0.35      |
| WOSCOPS               | 1337   | -0.064  | 0.10   | 0.53      |
| Summary               | 159223 | 0.036   | 0.0075 | 1.364e-06 |

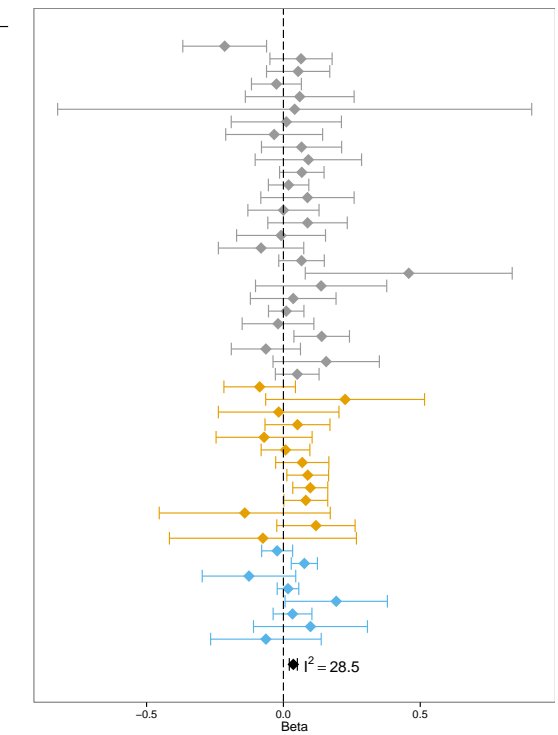

rs687621 in ABO association with DBP in EUR

| Study Name            | N      | Beta    | SE     | P-value   |
|-----------------------|--------|---------|--------|-----------|
| AIRWAVE               | 1902   | 0.022   | 0.035  | 0.53      |
| ASCOT_SC              | 2461   | 0.046   | 0.029  | 0.11      |
| 1958BC                | 5864   | 0.0019  | 0.020  | 0.92      |
| BRIGHT CASES          | 1105   | -0.062  | 0.048  | 0.19      |
| BRIGHT CONTROLS       | 127    | 0.069   | 0.15   | 0.65      |
| CROATIA-Korcula       | 823    | 0.057   | 0.052  | 0.27      |
| DIABNORD (GLACIER)    | 912    | 0.098   | 0.048  | 0.039     |
| EGCUT                 | 1785   | -0.0025 | 0.034  | 0.94      |
| FENLAND controls      | 1170   | -0.036  | 0.043  | 0.41      |
| FINRISK97/02          | 5153   | 0.030   | 0.020  | 0.13      |
| GS-SFHS               | 9831   | 0.020   | 0.018  | 0.24      |
| GLACIER controls      | 922    | 0.029   | 0.047  | 0.53      |
| GODARTS_diabetics     | 2657   | 0.012   | 0.031  | 0.69      |
| GODARTS_non diabetics | 2061   | 0.016   | 0.035  | 0.65      |
| GRAPHIC               | 1899   | 0.042   | 0.039  | 0.28      |
| HELICMANOLIS          | 961    | 0.0070  | 0.048  | 0.88      |
| HUNT                  | 4735   | 0.024   | 0.021  | 0.26      |
| LBC1921               | 359    | 0.13    | 0.085  | 0.14      |
| LBC1936               | 783    | -0.076  | 0.060  | 0.21      |
| LIFELINES             | 1948   | 0.027   | 0.034  | 0.44      |
| MDC                   | 8316   | 0.029   | 0.016  | 0.070     |
| NFBC1986              | 1887   | -0.0043 | 0.031  | 0.89      |
| PIVUS/ULSAM           | 1998   | 0.046   | 0.032  | 0.15      |
| UKHLS                 | 7240   | 0.015   | 0.018  | 0.40      |
| ADDITION              | 2310   | 0.012   | 0.031  | 0.70      |
| DPS                   | 416    | 0.064   | 0.068  | 0.35      |
| DR's EXTRA            | 739    | 0.038   | 0.051  | 0.45      |
| FIN-D2D 2007          | 2570   | 0.041   | 0.028  | 0.14      |
| FINRISK 2007          | 1088   | 0.055   | 0.044  | 0.21      |
| FUSION                | 4237   | -0.0038 | 0.022  | 0.86      |
| Health 2006/2008      | 3708   | 0.023   | 0.025  | 0.36      |
| Inter99               | 6078   | 0.016   | 0.019  | 0.40      |
| METSIM                | 8389   | 0.0081  | 0.016  | 0.61      |
| PPP                   | 4766   | 0.036   | 0.021  | 0.090     |
| SDC                   | 500    | 0.074   | 0.067  | 0.27      |
| SDR/ANDIS             | 2636   | 0.027   | 0.029  | 0.35      |
| VeijleCases           | 2006   | 0.00061 | 0.034  | 0.99      |
| VeijleCtrl            | 431    | 0.10    | 0.072  | 0.14      |
| CCHS                  | 8070   | 0.028   | 0.015  | 0.071     |
| CGPS                  | 11783  | 0.017   | 0.013  | 0.19      |
| CHIHS                 | 1434   | 0.034   | 0.039  | 0.38      |
| EPIC-CVD              | 15674  | 0.017   | 0.011  | 0.14      |
| EPIC-InterAct         | 1078   | 0.090   | 0.044  | 0.043     |
| MORGAM                | 5757   | 0.0032  | 0.018  | 0.86      |
| PROSPER               | 1275   | -0.016  | 0.045  | 0.72      |
| WOSCOPS               | 1337   | 0.078   | 0.041  | 0.056     |
| Summary               | 153183 | 0.020   | 0.0038 | 8.034e-08 |

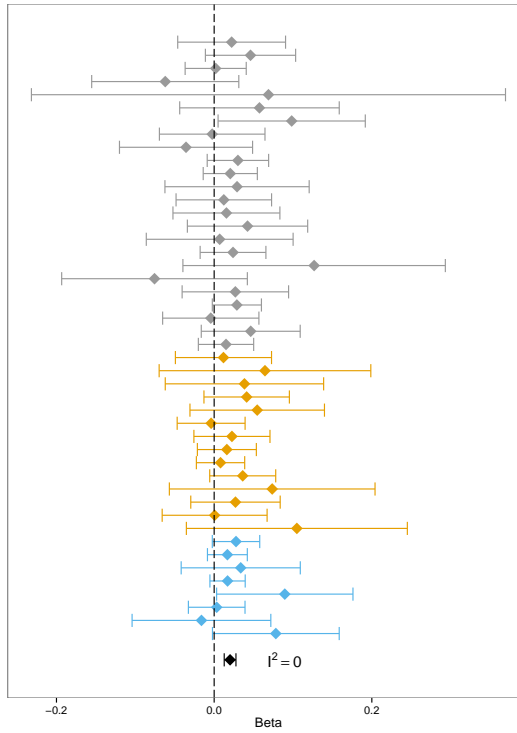

rs110419 in LMO1 association with DBP in EUR

| Study Name            | N      | Beta     | SE     | P-value   |
|-----------------------|--------|----------|--------|-----------|
| AIRWAVE               | 1902   | -0.0068  | 0.033  | 0.84      |
| ASCOT_SC              | 2461   | 0.027    | 0.028  | 0.34      |
| ASCOT_UK              | 3245   | -0.0068  | 0.025  | 0.78      |
| 1958BC                | 5864   | 0.028    | 0.018  | 0.12      |
| BRIGHT CASES          | 1105   | -0.011   | 0.043  | 0.80      |
| BRIGHT CONTROLS       | 127    | 0.076    | 0.13   | 0.55      |
| CROATIA-Korcula       | 823    | -0.033   | 0.051  | 0.51      |
| DIABNORD (GLACIER)    | 912    | 0.054    | 0.046  | 0.24      |
| EGCUT                 | 1785   | 0.055    | 0.034  | 0.11      |
| FENLAND controls      | 1170   | 0.047    | 0.041  | 0.26      |
| FINRISK97/02          | 5153   | 0.0057   | 0.020  | 0.77      |
| GS-SFHS               | 9827   | 0.025    | 0.015  | 0.090     |
| GLACIER controls      | 922    | 0.0028   | 0.046  | 0.95      |
| GODARTS_diabetics     | 2657   | 0.017    | 0.027  | 0.53      |
| GODARTS_non diabetics | 2061   | 0.019    | 0.031  | 0.54      |
| GRAPHIC               | 1899   | 0.019    | 0.034  | 0.58      |
| HELICMANOLIS          | 961    | 0.029    | 0.047  | 0.53      |
| HUNT                  | 4735   | -0.030   | 0.020  | 0.14      |
| LBC1921               | 359    | 0.082    | 0.074  | 0.27      |
| LBC1936               | 783    | 0.012    | 0.052  | 0.81      |
| LIFELINES             | 1948   | 0.018    | 0.031  | 0.56      |
| MDC                   | 8320   | -0.0028  | 0.016  | 0.86      |
| NFBC1986              | 1887   | -0.00055 | 0.032  | 0.99      |
| OB                    | 4440   | 0.052    | 0.021  | 0.015     |
| PIVUS/ULSAM           | 1998   | -0.021   | 0.031  | 0.50      |
| TwinsUK               | 1014   | 0.00047  | 0.045  | 0.99      |
| UKHLS                 | 7240   | 0.0081   | 0.017  | 0.63      |
| ADDITION              | 2310   | 0.020    | 0.030  | 0.49      |
| DPS                   | 416    | -0.090   | 0.068  | 0.19      |
| DR's EXTRA            | 739    | 0.015    | 0.052  | 0.77      |
| FIN-D2D 2007          | 2570   | -0.018   | 0.028  | 0.51      |
| FINRISK 2007          | 1088   | 0.033    | 0.042  | 0.44      |
| FUSION                | 4237   | 0.0031   | 0.022  | 0.89      |
| Health 2006/2008      | 3708   | -0.0073  | 0.023  | 0.75      |
| Inter99               | 6078   | 0.0081   | 0.018  | 0.66      |
| METSIM                | 8389   | 0.023    | 0.016  | 0.15      |
| SDC                   | 500    | 0.065    | 0.061  | 0.29      |
| SDR/ANDIS             | 2636   | 0.043    | 0.028  | 0.12      |
| VeijleCases           | 2006   | -0.0041  | 0.032  | 0.90      |
| VeijleCtrl            | 431    | 0.0046   | 0.069  | 0.95      |
| CCHS                  | 8070   | 0.023    | 0.015  | 0.12      |
| CGPS                  | 11783  | 0.022    | 0.012  | 0.072     |
| CHIHS                 | 1434   | -0.0062  | 0.037  | 0.87      |
| EPIC-CVD              | 15674  | 0.022    | 0.011  | 0.038     |
| EPIC-InterAct         | 1078   | -0.047   | 0.044  | 0.28      |
| MORGAM                | 5757   | 0.023    | 0.018  | 0.20      |
| PROSPER               | 1275   | 0.099    | 0.039  | 0.010     |
| WOSCOPS               | 1337   | -0.025   | 0.038  | 0.51      |
| Summary               | 157114 | 0.015    | 0.0035 | 3.104e-05 |

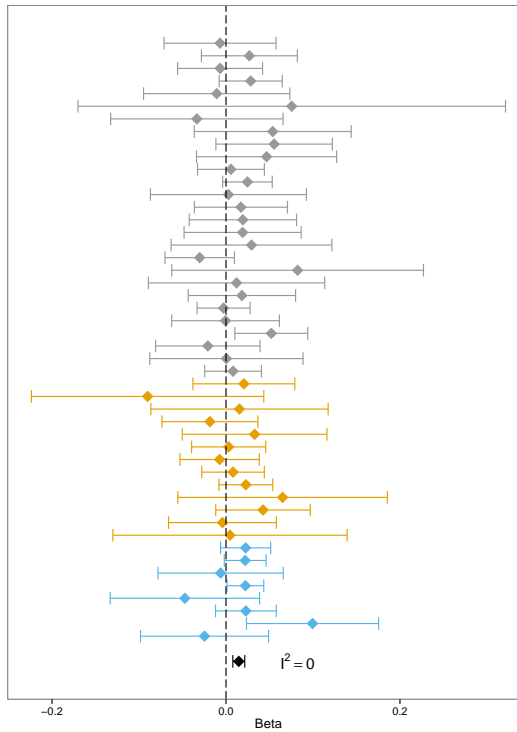

rs10995311 in ADO association with DBP in EUR

| Study Name            | N      | Beta    | SE     | P-value   |
|-----------------------|--------|---------|--------|-----------|
| AIRWAVE               | 1902   | 0.064   | 0.032  | 0.046     |
| ASCOT_SC              | 2461   | -0.032  | 0.029  | 0.27      |
| ASCOT_UK              | 3245   | 0.063   | 0.025  | 0.011     |
| 1958BC                | 5864   | 0.0046  | 0.019  | 0.80      |
| BRIGHT CASES          | 1105   | -0.019  | 0.043  | 0.66      |
| BRIGHT CONTROLS       | 127    | 0.030   | 0.13   | 0.82      |
| DIABNORD (GLACIER)    | 912    | -0.036  | 0.047  | 0.44      |
| EGCUT                 | 1785   | 0.031   | 0.035  | 0.36      |
| FENLAND controls      | 1170   | -0.028  | 0.042  | 0.50      |
| GLACIER controls      | 922    | 0.049   | 0.047  | 0.29      |
| GODARTS_diabetics     | 2657   | 0.024   | 0.027  | 0.39      |
| GODARTS_non diabetics | 2061   | 0.022   | 0.031  | 0.47      |
| GRAPHIC               | 1899   | 0.055   | 0.036  | 0.12      |
| HELICMANOLIS          | 961    | 0.055   | 0.048  | 0.25      |
| HUNT                  | 4735   | 0.030   | 0.021  | 0.15      |
| LIFELINES             | 1948   | -0.0039 | 0.032  | 0.90      |
| MDC                   | 8320   | 0.030   | 0.016  | 0.056     |
| NFBC1986              | 1887   | 0.024   | 0.033  | 0.46      |
| OB                    | 4440   | 0.013   | 0.021  | 0.54      |
| PIVUS/ULSAM           | 1998   | 0.068   | 0.032  | 0.031     |
| TwinsUK               | 1014   | 0.035   | 0.044  | 0.43      |
| UKHLS                 | 7239   | 0.044   | 0.017  | 0.0086    |
| ADDITION              | 2310   | 0.037   | 0.029  | 0.20      |
| DPS                   | 416    | -0.080  | 0.073  | 0.28      |
| DR's EXTRA            | 739    | 0.034   | 0.054  | 0.53      |
| FIN-D2D 2007          | 2570   | 0.058   | 0.029  | 0.044     |
| FINRISK 2007          | 1088   | 0.052   | 0.043  | 0.23      |
| FUSION                | 4237   | -0.037  | 0.022  | 0.092     |
| Health 2006/2008      | 3709   | 0.023   | 0.023  | 0.33      |
| Inter99               | 6078   | -0.0053 | 0.019  | 0.78      |
| METSIM                | 8389   | 0.027   | 0.016  | 0.098     |
| PPP                   | 4766   | 0.060   | 0.021  | 0.0040    |
| SDC                   | 500    | 0.058   | 0.061  | 0.35      |
| SDR/ANDIS             | 2636   | 0.014   | 0.028  | 0.61      |
| VeijleCases           | 2006   | 0.025   | 0.033  | 0.45      |
| VeijleCtrl            | 431    | 0.0097  | 0.069  | 0.89      |
| CCHS                  | 8070   | -0.0011 | 0.015  | 0.94      |
| CGPS                  | 11783  | 0.011   | 0.012  | 0.38      |
| CHIHS                 | 1434   | 0.016   | 0.037  | 0.67      |
| EPIC-CVD              | 15674  | -0.0041 | 0.011  | 0.70      |
| EPIC-InterAct         | 1078   | -0.0049 | 0.045  | 0.91      |
| MORGAM                | 5757   | 0.034   | 0.018  | 0.065     |
| WOSCOPS               | 1337   | -0.015  | 0.037  | 0.68      |
| Summary               | 143660 | 0.017   | 0.0037 | 2.632e-06 |

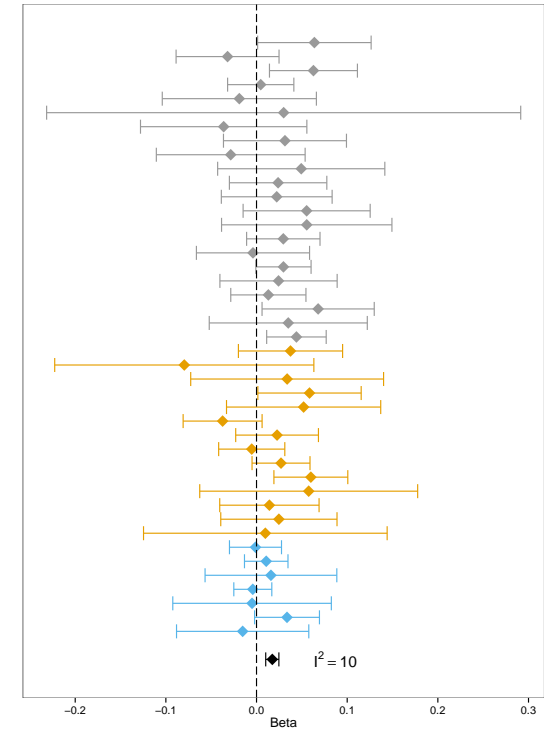

rs11229457 in OR5B12 association with SBP in EUR

| Study Name            | N      | Beta    | SE     | P-value   |
|-----------------------|--------|---------|--------|-----------|
| AIRWAVE               | 1902   | -0.010  | 0.042  | 0.81      |
| ASCOT_SC              | 2461   | 0.0093  | 0.033  | 0.78      |
| ASCOT_UK              | 3245   | 0.045   | 0.031  | 0.15      |
| 1958BC                | 5864   | -0.013  | 0.023  | 0.57      |
| BRIGHT CASES          | 1105   | -0.0084 | 0.054  | 0.88      |
| BRIGHT CONTROLS       | 127    | 0.15    | 0.27   | 0.57      |
| CROATIA-Korcula       | 821    | 0.0075  | 0.061  | 0.90      |
| DIABNORD (GLACIER)    | 912    | -0.093  | 0.053  | 0.077     |
| EGCUT                 | 1785   | 0.014   | 0.041  | 0.71      |
| FENLAND controls      | 1170   | 0.0056  | 0.049  | 0.93      |
| FINRISK97/02          | 5152   | -0.0046 | 0.023  | 0.84      |
| GS-SFHS               | 9828   | -0.059  | 0.020  | 0.0025    |
| GLACIER controls      | 922    | -0.034  | 0.054  | 0.53      |
| GODARTS_diabetics     | 2657   | -0.048  | 0.035  | 0.18      |
| GODARTS_non diabetics | 2061   | 0.0097  | 0.040  | 0.81      |
| GRAPHIC               | 1899   | 0.051   | 0.044  | 0.25      |
| HELICMANOLIS          | 961    | -0.054  | 0.058  | 0.36      |
| HUNT                  | 4735   | 0.0091  | 0.024  | 0.70      |
| LBC1921               | 359    | 0.12    | 0.089  | 0.17      |
| LBC1936               | 783    | 0.013   | 0.066  | 0.84      |
| LIFELINES             | 1948   | -0.038  | 0.037  | 0.30      |
| MDC                   | 8317   | -0.040  | 0.018  | 0.027     |
| NFBC1986              | 1887   | 0.035   | 0.036  | 0.33      |
| OB                    | 4440   | 0.0077  | 0.026  | 0.77      |
| PIVUS/ULSAM           | 1998   | -0.021  | 0.038  | 0.57      |
| TwinsUK               | 1014   | -0.10   | 0.053  | 0.056     |
| UKHLS                 | 7239   | 0.014   | 0.020  | 0.51      |
| ADDITION              | 2310   | -0.021  | 0.034  | 0.54      |
| DPS                   | 416    | 0.079   | 0.079  | 0.32      |
| DR's EXTRA            | 739    | -0.046  | 0.060  | 0.44      |
| FIN-D2D 2007          | 2570   | -0.0034 | 0.033  | 0.92      |
| FINRISK 2007          | 1088   | -0.0085 | 0.050  | 0.87      |
| FUSION                | 4237   | 0.0052  | 0.025  | 0.84      |
| Health 2006/2008      | 3709   | -0.031  | 0.027  | 0.26      |
| Inter99               | 6080   | -0.034  | 0.022  | 0.11      |
| METSIM                | 8388   | -0.044  | 0.018  | 0.014     |
| PPP                   | 4766   | -0.0059 | 0.024  | 0.81      |
| SDC                   | 500    | -0.075  | 0.072  | 0.30      |
| SDR/ANDIS             | 2636   | -0.12   | 0.032  | 0.00013   |
| VeijleCases           | 2000   | -0.030  | 0.037  | 0.41      |
| VeijleCtrl            | 430    | 0.10    | 0.075  | 0.17      |
| CCHS                  | 8070   | -0.019  | 0.016  | 0.21      |
| CGPS                  | 11784  | -0.017  | 0.013  | 0.20      |
| CHIHS                 | 1436   | 0.0012  | 0.043  | 0.98      |
| EPIC-CVD              | 15676  | -0.012  | 0.012  | 0.12      |
| EPIC-InterAct         | 1077   | -0.056  | 0.053  | 0.29      |
| MORGAM                | 5757   | -0.039  | 0.021  | 0.060     |
| PROSPER               | 1275   | 0.021   | 0.049  | 0.68      |
| WOSCOPS               | 1337   | 0.10    | 0.047  | 0.034     |
| Summary               | 161873 | -0.018  | 0.0041 | 1.206e-05 |

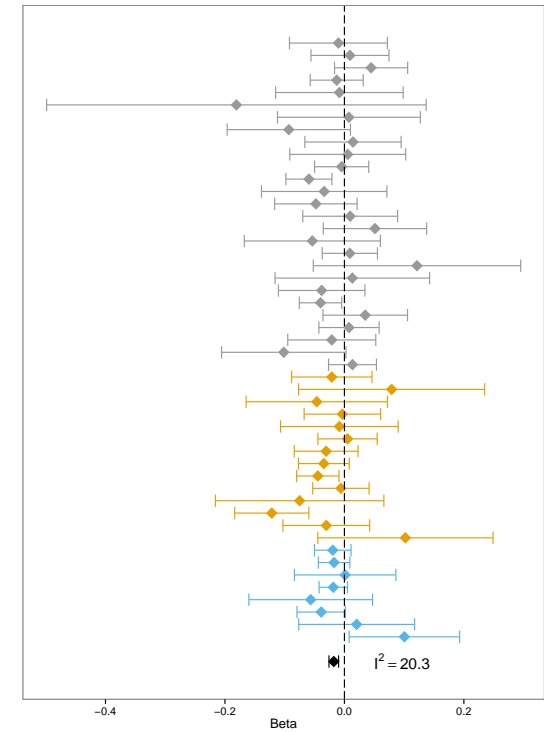

rs7302981 in *CERS5* association with DBP in EUR

| Study Name            | N      | Beta    | SE     | P-value   |
|-----------------------|--------|---------|--------|-----------|
| AIRWAVE               | 1902   | 0.077   | 0.033  | 0.019     |
| ASCOT_SC              | 2461   | -0.0066 | 0.030  | 0.82      |
| ASCOT_UK              | 3245   | -0.039  | 0.025  | 0.13      |
| 1958BC                | 5864   | 0.042   | 0.019  | 0.026     |
| BRIGHT CASES          | 1105   | 0.020   | 0.044  | 0.65      |
| BRIGHT CONTROLS       | 127    | 0.0074  | 0.14   | 0.96      |
| CROATIA-Korcula       | 825    | -0.0031 | 0.052  | 0.95      |
| DIABNORD (GLACIER)    | 912    | -0.0054 | 0.050  | 0.91      |
| EGCUT                 | 1785   | -0.020  | 0.035  | 0.57      |
| FENLAND controls      | 1170   | 0.11    | 0.044  | 0.010     |
| FINRISK7/02           | 5153   | 0.054   | 0.020  | 0.0077    |
| GS-SFHS               | 9829   | 0.028   | 0.015  | 0.075     |
| GLACIER controls      | 922    | 0.093   | 0.050  | 0.066     |
| GODARTS_diabetics     | 2657   | 0.045   | 0.029  | 0.11      |
| GODARTS_non diabetics | 2061   | 0.030   | 0.032  | 0.36      |
| GRAPHIC               | 1899   | 0.10    | 0.036  | 0.0053    |
| HELICMANOLIS          | 961    | 0.015   | 0.050  | 0.77      |
| HUNT                  | 4735   | 0.035   | 0.022  | 0.11      |
| LBC1921               | 359    | -0.028  | 0.076  | 0.71      |
| LBC1936               | 783    | -0.026  | 0.051  | 0.62      |
| LIFELINES             | 1948   | 0.042   | 0.033  | 0.20      |
| MDC                   | 8320   | 0.024   | 0.016  | 0.14      |
| NFBC1986              | 1887   | -0.013  | 0.033  | 0.69      |
| OB                    | 4440   | 0.045   | 0.022  | 0.043     |
| PIVUS/ULSAM           | 1998   | 0.027   | 0.034  | 0.42      |
| TwinsUK               | 1014   | 0.015   | 0.044  | 0.74      |
| UKHLS                 | 7240   | 0.018   | 0.017  | 0.30      |
| ADDITION              | 2310   | -0.0039 | 0.030  | 0.90      |
| DPS                   | 416    | 0.14    | 0.070  | 0.041     |
| DR's EXTRA            | 739    | -0.017  | 0.055  | 0.75      |
| FIN-D2D 2007          | 2570   | 0.029   | 0.039  | 0.84      |
| FINRISK 2007          | 1088   | 0.052   | 0.045  | 0.25      |
| FUSION                | 4237   | 0.027   | 0.022  | 0.22      |
| Health 2006/2008      | 3709   | 0.028   | 0.024  | 0.24      |
| Inter99               | 6078   | 0.016   | 0.019  | 0.40      |
| METSIM                | 8389   | 0.037   | 0.016  | 0.018     |
| PPP                   | 4766   | 0.028   | 0.021  | 0.19      |
| SDC                   | 500    | -0.036  | 0.066  | 0.59      |
| SDR/ANDIS             | 2636   | -0.012  | 0.029  | 0.68      |
| Veijecases            | 2006   | -0.0092 | 0.032  | 0.78      |
| Veijectrl             | 431    | 0.029   | 0.068  | 0.67      |
| CCHS                  | 8070   | 0.021   | 0.015  | 0.16      |
| CGPS                  | 11783  | 0.027   | 0.013  | 0.030     |
| CIHDS                 | 1434   | -0.0093 | 0.037  | 0.80      |
| EPIC-CVD              | 15674  | 0.035   | 0.011  | 0.0016    |
| EPIC-InterAct         | 1078   | 0.015   | 0.045  | 0.74      |
| MORGAM                | 5757   | 0.013   | 0.018  | 0.46      |
| PROSPER               | 1275   | -0.033  | 0.041  | 0.41      |
| WOSCOPS               | 1337   | -0.0013 | 0.038  | 0.97      |
| Summary               | 161884 | 0.025   | 0.0036 | 3.734e-12 |

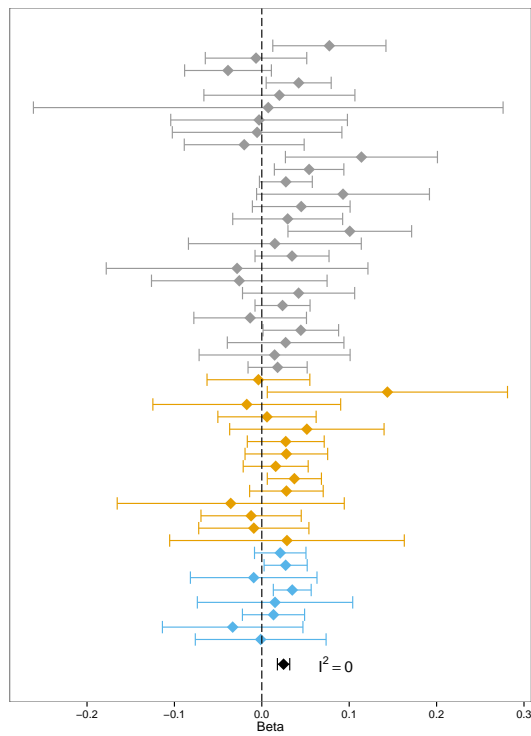rs452036 in *MYH6* association with PP in EUR

| Study Name            | N      | Beta    | SE     | P-value   |
|-----------------------|--------|---------|--------|-----------|
| AIRWAVE               | 1902   | -0.032  | 0.034  | 0.35      |
| ASCOT_SC              | 2461   | -0.069  | 0.031  | 0.025     |
| ASCOT_UK              | 3245   | 0.017   | 0.026  | 0.52      |
| 1958BC                | 5861   | -0.025  | 0.019  | 0.20      |
| BRIGHT CASES          | 1105   | 0.016   | 0.045  | 0.71      |
| BRIGHT CONTROLS       | 127    | -0.21   | 0.14   | 0.13      |
| CROATIA-Korcula       | 824    | 0.094   | 0.055  | 0.085     |
| DIABNORD (GLACIER)    | 912    | -0.10   | 0.052  | 0.054     |
| EGCUT                 | 1785   | -0.054  | 0.037  | 0.15      |
| FENLAND controls      | 1170   | -0.044  | 0.043  | 0.30      |
| FINRISK7/02           | 5153   | -0.053  | 0.022  | 0.00084   |
| GS-SFHS               | 9827   | -0.036  | 0.015  | 0.018     |
| GLACIER controls      | 922    | -0.12   | 0.050  | 0.015     |
| GODARTS_diabetics     | 2657   | -0.064  | 0.029  | 0.026     |
| GODARTS_non diabetics | 2061   | -0.021  | 0.032  | 0.51      |
| GRAPHIC               | 1899   | 0.036   | 0.036  | 0.92      |
| HELICMANOLIS          | 961    | -0.040  | 0.050  | 0.42      |
| HUNT                  | 4735   | -0.016  | 0.022  | 0.46      |
| LBC1921               | 359    | -0.017  | 0.075  | 0.82      |
| LBC1936               | 783    | -0.11   | 0.055  | 0.042     |
| LIFELINES             | 1948   | 0.049   | 0.034  | 0.10      |
| MDC                   | 8318   | -0.027  | 0.017  | 0.10      |
| NFBC1986              | 1887   | 0.0055  | 0.034  | 0.87      |
| OB                    | 4440   | -0.039  | 0.022  | 0.077     |
| PIVUS/ULSAM           | 1998   | -0.0031 | 0.034  | 0.93      |
| TwinsUK               | 1014   | 0.049   | 0.046  | 0.30      |
| UKHLS                 | 7236   | -0.063  | 0.017  | 0.00025   |
| ADDITION              | 2309   | -0.048  | 0.031  | 0.13      |
| DPS                   | 416    | -0.13   | 0.078  | 0.10      |
| DR's EXTRA            | 739    | 0.011   | 0.060  | 0.85      |
| FIN-D2D 2007          | 2570   | -0.030  | 0.032  | 0.34      |
| FINRISK 2007          | 1088   | -0.026  | 0.049  | 0.60      |
| FUSION                | 4237   | -0.032  | 0.024  | 0.18      |
| Health 2006/2008      | 3709   | -0.017  | 0.025  | 0.50      |
| Inter99               | 6077   | 0.0090  | 0.019  | 0.63      |
| METSIM                | 8389   | 0.018   | 0.018  | 0.064     |
| PPP                   | 4766   | -0.027  | 0.023  | 0.25      |
| SDC                   | 499    | 0.020   | 0.068  | 0.77      |
| SDR/ANDIS             | 2634   | 0.040   | 0.030  | 0.89      |
| Veijecases            | 2000   | -0.052  | 0.033  | 0.12      |
| Veijectrl             | 430    | 0.021   | 0.071  | 0.77      |
| CCHS                  | 8070   | -0.0087 | 0.014  | 0.54      |
| CGPS                  | 11781  | -0.0059 | 0.012  | 0.63      |
| CIHDS                 | 1433   | 0.021   | 0.037  | 0.58      |
| EPIC-CVD              | 15672  | -0.026  | 0.011  | 0.015     |
| EPIC-InterAct         | 1077   | -0.081  | 0.045  | 0.045     |
| MORGAM                | 5757   | -0.067  | 0.019  | 0.00049   |
| PROSPER               | 1275   | 0.038   | 0.041  | 0.36      |
| WOSCOPS               | 1336   | -0.040  | 0.040  | 0.31      |
| Summary               | 161850 | -0.026  | 0.0037 | 7.945e-13 |

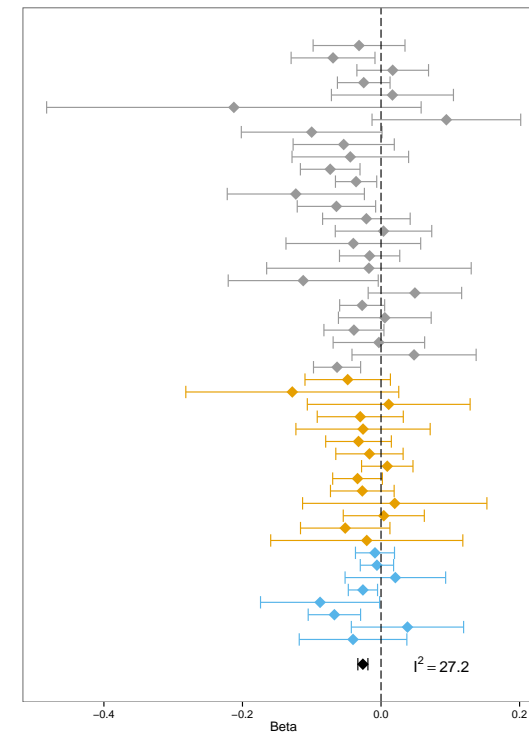rs1126464 in *DPEP1* association with DBP in EUR

| Study Name            | N      | Beta    | SE     | P-value   |
|-----------------------|--------|---------|--------|-----------|
| AIRWAVE               | 1902   | -0.0096 | 0.038  | 0.80      |
| ASCOT_SC              | 2461   | 0.033   | 0.29   | 0.93      |
| ASCOT_UK              | 3245   | 0.0028  | 0.028  | 0.92      |
| 1958BC                | 5864   | 0.025   | 0.022  | 0.25      |
| BRIGHT CASES          | 1105   | 0.068   | 0.049  | 0.17      |
| BRIGHT CONTROLS       | 127    | -0.14   | 0.18   | 0.46      |
| DIABNORD (GLACIER)    | 912    | 0.059   | 0.053  | 0.26      |
| EGCUT                 | 1785   | 0.045   | 0.039  | 0.25      |
| FENLAND controls      | 1170   | -0.043  | 0.050  | 0.40      |
| GLACIER controls      | 922    | 0.012   | 0.054  | 0.82      |
| GODARTS_diabetics     | 2657   | 0.078   | 0.033  | 0.018     |
| GODARTS_non diabetics | 2061   | 0.060   | 0.036  | 0.10      |
| GRAPHIC               | 1899   | 0.039   | 0.039  | 0.32      |
| HELICMANOLIS          | 961    | 0.15    | 0.055  | 0.0059    |
| HUNT                  | 4735   | 0.023   | 0.023  | 0.33      |
| LIFELINES             | 1948   | 0.074   | 0.036  | 0.042     |
| MDC                   | 8315   | 0.054   | 0.017  | 0.0020    |
| NFBC1986              | 1887   | -0.030  | 0.034  | 0.38      |
| OB                    | 4440   | 0.0069  | 0.024  | 0.78      |
| TwinsUK               | 1014   | 0.076   | 0.051  | 0.14      |
| UKHLS                 | 7240   | 0.044   | 0.020  | 0.026     |
| ADDITION              | 2310   | 0.066   | 0.033  | 0.049     |
| DPS                   | 416    | 0.086   | 0.075  | 0.26      |
| DR's EXTRA            | 739    | -0.012  | 0.060  | 0.83      |
| FIN-D2D 2007          | 2570   | 0.041   | 0.031  | 0.18      |
| FINRISK 2007          | 1088   | 0.057   | 0.046  | 0.22      |
| FUSION                | 4237   | 0.020   | 0.023  | 0.39      |
| Health 2006/2008      | 3709   | 0.051   | 0.027  | 0.059     |
| Inter99               | 6078   | 0.023   | 0.022  | 0.28      |
| METSIM                | 8389   | 0.0078  | 0.017  | 0.64      |
| PPP                   | 4766   | 0.062   | 0.023  | 0.0076    |
| SDC                   | 500    | -0.011  | 0.072  | 0.88      |
| SDR/ANDIS             | 2636   | -0.0082 | 0.031  | 0.84      |
| Veijecases            | 2006   | 0.016   | 0.038  | 0.65      |
| Veijectrl             | 431    | 0.027   | 0.076  | 0.72      |
| CCHS                  | 8070   | 0.044   | 0.017  | 0.0093    |
| CGPS                  | 11783  | 0.0039  | 0.014  | 0.79      |
| CIHDS                 | 1434   | 0.042   | 0.042  | 0.32      |
| EPIC-CVD              | 15674  | 0.019   | 0.013  | 0.14      |
| EPIC-InterAct         | 1078   | -0.0099 | 0.052  | 0.85      |
| MORGAM                | 5757   | 0.024   | 0.020  | 0.24      |
| PROSPER               | 1275   | -0.084  | 0.045  | 0.060     |
| WOSCOPS               | 1337   | 0.035   | 0.045  | 0.44      |
| Summary               | 142933 | 0.028   | 0.0042 | 8.367e-11 |

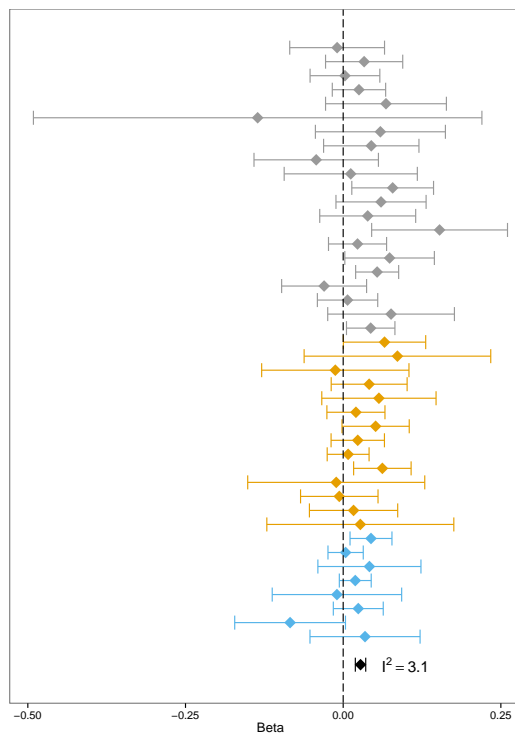rs7406910 in *HOXB7* association with SBP in EUR

| Study Name            | N      | Beta     | SE     | P-value   |
|-----------------------|--------|----------|--------|-----------|
| AIRWAVE               | 1902   | -0.14    | 0.055  | 0.012     |
| ASCOT_SC              | 2460   | 0.030    | 0.054  | 0.58      |
| ASCOT_UK              | 3245   | -0.023   | 0.046  | 0.61      |
| 1958BC                | 5864   | -0.024   | 0.033  | 0.46      |
| BRIGHT CASES          | 1105   | -0.11    | 0.075  | 0.14      |
| BRIGHT CONTROLS       | 127    | 0.33     | 0.22   | 0.13      |
| CROATIA-Korcula       | 827    | -0.13    | 0.12   | 0.29      |
| DIABNORD (GLACIER)    | 912    | 0.10     | 0.078  | 0.20      |
| EGCUT                 | 1785   | -0.0066  | 0.066  | 0.92      |
| FENLAND controls      | 1170   | -0.040   | 0.071  | 0.57      |
| FINRISK7/02           | 5152   | -0.037   | 0.047  | 0.43      |
| GS-SFHS               | 9832   | -0.050   | 0.026  | 0.050     |
| GLACIER controls      | 922    | -0.096   | 0.077  | 0.21      |
| GODARTS_diabetics     | 2657   | -0.015   | 0.049  | 0.77      |
| GODARTS_non diabetics | 2061   | -0.064   | 0.055  | 0.24      |
| GRAPHIC               | 1899   | -0.11    | 0.061  | 0.081     |
| HELICMANOLIS          | 961    | -0.063   | 0.087  | 0.47      |
| HUNT                  | 4735   | -0.027   | 0.033  | 0.40      |
| LBC1921               | 359    | -0.25    | 0.14   | 0.070     |
| LBC1936               | 783    | 0.084    | 0.084  | 0.27      |
| LIFELINES             | 1948   | -0.0095  | 0.054  | 0.86      |
| MDC                   | 8314   | -0.0026  | 0.027  | 0.92      |
| NFBC1986              | 1886   | -0.040   | 0.074  | 0.59      |
| OB                    | 4440   | -0.058   | 0.038  | 0.13      |
| PIVUS/ULSAM           | 1998   | -0.019   | 0.056  | 0.74      |
| TwinsUK               | 1014   | -0.089   | 0.077  | 0.25      |
| UKHLS                 | 7240   | -0.074   | 0.030  | 0.013     |
| ADDITION              | 2310   | -0.049   | 0.049  | 0.32      |
| DPS                   | 416    | -0.096   | 0.19   | 0.61      |
| DR's EXTRA            | 739    | -0.14    | 0.15   | 0.32      |
| FIN-D2D 2007          | 2570   | -0.035   | 0.064  | 0.59      |
| FINRISK 2007          | 1088   | -0.010   | 0.11   | 0.92      |
| FUSION                | 4237   | 0.036    | 0.052  | 0.49      |
| Health 2006/2008      | 3709   | -0.065   | 0.039  | 0.098     |
| Inter99               | 6080   | -0.098   | 0.031  | 0.0014    |
| METSIM                | 8389   | 0.052    | 0.042  | 0.21      |
| PPP                   | 4766   | -0.072   | 0.036  | 0.048     |
| SDC                   | 500    | 0.058    | 0.11   | 0.60      |
| SDR/ANDIS             | 2636   | -0.030   | 0.048  | 0.53      |
| Veijecases            | 2000   | 0.026    | 0.052  | 0.62      |
| Veijectrl             | 430    | 0.12     | 0.25   | 0.25      |
| CCHS                  | 8070   | -0.059   | 0.023  | 0.0091    |
| CGPS                  | 11784  | -0.00061 | 0.019  | 0.98      |
| CIHDS                 | 1436   | 0.020    | 0.059  | 0.74      |
| EPIC-CVD              | 15676  | -0.057   | 0.018  | 0.0015    |
| EPIC-InterAct         | 1077   | -0.034   | 0.077  | 0.66      |
| MORGAM                | 5757   | -0.016   | 0.037  | 0.67      |
| PROSPER               | 1275   | -0.017   | 0.070  | 0.81      |
| WOSCOPS               | 1337   | -0.0074  | 0.068  | 0.91      |
| Summary               | 161880 | -0.038   | 0.0062 | 6.711e-10 |

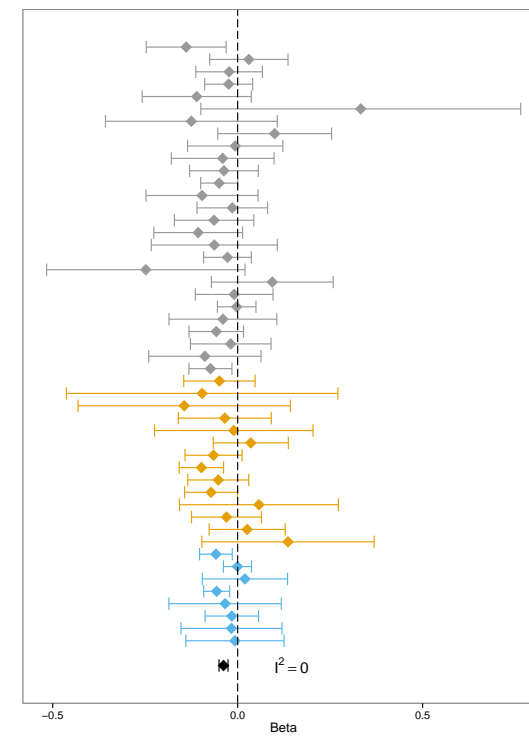

rs068318 in *TBX2* association with DBP in EUR

| Study Name            | N      | Beta    | SE     | P-value   |
|-----------------------|--------|---------|--------|-----------|
| AIRWAVE               | 1902   | -0.0068 | 0.037  | 0.85      |
| ASCOT_SC              | 2461   | -0.025  | 0.033  | 0.44      |
| ASCOT_UK              | 3245   | -0.033  | 0.028  | 0.25      |
| 1958BC                | 5864   | 0.029   | 0.021  | 0.16      |
| BRIGHT CASES          | 1105   | 0.030   | 0.050  | 0.55      |
| BRIGHT CONTROLS       | 127    | -0.11   | 0.16   | 0.47      |
| CROATIA-Korcula       | 826    | 0.061   | 0.057  | 0.29      |
| DIABNORD (GLACIER)    | 912    | 0.043   | 0.054  | 0.42      |
| EGCUT                 | 1785   | -0.0064 | 0.039  | 0.87      |
| FENLAND controls      | 1170   | -0.018  | 0.045  | 0.70      |
| FINRISK97/02          | 5152   | 0.075   | 0.022  | 0.00063   |
| GS-SFHS               | 9832   | 0.015   | 0.017  | 0.37      |
| GLACIER controls      | 922    | 0.034   | 0.052  | 0.52      |
| GODARTS_diabetics     | 2657   | 0.029   | 0.031  | 0.36      |
| GODARTS_non diabetics | 2061   | 0.095   | 0.035  | 0.0074    |
| GRAPHIC               | 1899   | -0.029  | 0.038  | 0.44      |
| HELICMANOLIS          | 961    | 0.020   | 0.051  | 0.70      |
| HUNT                  | 4735   | 0.023   | 0.023  | 0.21      |
| LBC1921               | 359    | 0.084   | 0.089  | 0.35      |
| LBC1936               | 783    | 0.087   | 0.059  | 0.14      |
| LIFELINES             | 1948   | 0.00017 | 0.036  | 1.0       |
| MDC                   | 8317   | 0.062   | 0.018  | 0.00053   |
| NFBC1986              | 1887   | -0.027  | 0.035  | 0.45      |
| OB                    | 4440   | 0.029   | 0.024  | 0.23      |
| PIVUS/ULSAM           | 1998   | 0.082   | 0.037  | 0.028     |
| TwinsUK               | 1014   | 0.073   | 0.049  | 0.14      |
| UKHLS                 | 7239   | 0.029   | 0.019  | 0.12      |
| ADDITION              | 2310   | -0.037  | 0.034  | 0.27      |
| DPS                   | 416    | -0.014  | 0.078  | 0.86      |
| DR's EXTRA            | 739    | -0.026  | 0.060  | 0.66      |
| FIN-D2D 2007          | 2570   | 0.059   | 0.031  | 0.055     |
| FINRISK 2007          | 1088   | -0.044  | 0.048  | 0.35      |
| FUSION                | 4237   | 0.034   | 0.024  | 0.16      |
| Health 2006/2008      | 3709   | -0.020  | 0.026  | 0.70      |
| Inter99               | 6078   | 0.038   | 0.020  | 0.066     |
| METSIM                | 8389   | 0.039   | 0.018  | 0.026     |
| PPP                   | 4766   | -0.0030 | 0.023  | 0.90      |
| SDC                   | 500    | -0.0064 | 0.078  | 0.93      |
| VejeCases             | 2006   | 0.036   | 0.036  | 0.11      |
| VejeCtrl              | 431    | -0.056  | 0.079  | 0.48      |
| CCHS                  | 8070   | 0.0063  | 0.017  | 0.70      |
| CGPS                  | 11783  | 0.019   | 0.014  | 0.16      |
| CIHDS                 | 1434   | 0.034   | 0.040  | 0.39      |
| EPIC-CVD              | 15674  | 0.025   | 0.012  | 0.034     |
| EPIC-InterAct         | 1078   | 0.042   | 0.049  | 0.93      |
| MORGAM                | 5757   | 0.049   | 0.020  | 0.015     |
| PROSPER               | 1275   | -0.040  | 0.044  | 0.37      |
| WOSCOPS               | 1337   | 0.010   | 0.043  | 0.81      |
| Summary               | 159248 | 0.024   | 0.0039 | 5.579e-10 |

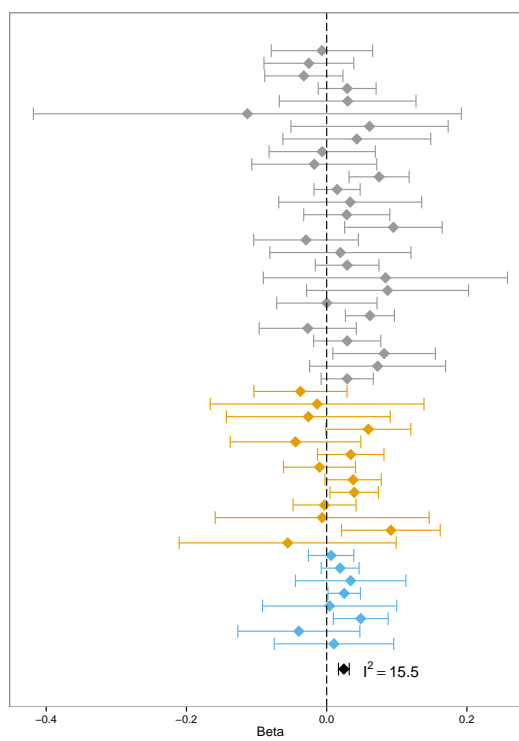rs10407022 in *AMH* association with PP in EUR

| Study Name            | N      | Beta     | SE     | P-value   |
|-----------------------|--------|----------|--------|-----------|
| AIRWAVE               | 1902   | -0.017   | 0.043  | 0.70      |
| ASCOT_SC              | 2460   | -0.027   | 0.036  | 0.45      |
| ASCOT_UK              | 3245   | 0.014    | 0.033  | 0.68      |
| 1958BC                | 5861   | -0.046   | 0.025  | 0.066     |
| BRIGHT CASES          | 1105   | -0.044   | 0.057  | 0.44      |
| BRIGHT CONTROLS       | 127    | -0.31    | 0.19   | 0.10      |
| CROATIA-Korcula       | 824    | -0.072   | 0.073  | 0.33      |
| DIABNORD (GLACIER)    | 911    | -0.014   | 0.056  | 0.81      |
| EGCUT                 | 1785   | 0.0073   | 0.044  | 0.87      |
| FENLAND controls      | 1170   | -0.0093  | 0.053  | 0.86      |
| FINRISK97/02          | 5151   | -0.047   | 0.025  | 0.058     |
| GS-SFHS               | 9828   | -0.0080  | 0.019  | 0.68      |
| GLACIER controls      | 922    | -0.15    | 0.056  | 0.0085    |
| GODARTS_diabetics     | 2657   | -0.014   | 0.037  | 0.71      |
| GODARTS_non diabetics | 2061   | -0.028   | 0.042  | 0.51      |
| GRAPHIC               | 1899   | -0.0046  | 0.047  | 0.92      |
| HELICMANOLIS          | 961    | 0.0062   | 0.071  | 0.93      |
| HUNT                  | 4735   | -0.00044 | 0.026  | 0.99      |
| LBC1921               | 359    | -0.057   | 0.099  | 0.57      |
| LBC1936               | 783    | -0.088   | 0.066  | 0.18      |
| LIFELINES             | 1948   | -0.054   | 0.042  | 0.20      |
| NFBC1986              | 1887   | -0.025   | 0.037  | 0.49      |
| OB                    | 4438   | -0.014   | 0.029  | 0.64      |
| PIVUS/ULSAM           | 1986   | -0.016   | 0.041  | 0.70      |
| TwinsUK               | 1014   | 0.020    | 0.058  | 0.73      |
| UKHLS                 | 7238   | -0.031   | 0.022  | 0.16      |
| ADDITION              | 2306   | -0.047   | 0.040  | 0.23      |
| DPS                   | 416    | -0.028   | 0.087  | 0.75      |
| DR's EXTRA            | 739    | 0.062    | 0.066  | 0.34      |
| FIN-D2D 2007          | 2570   | -0.092   | 0.036  | 0.011     |
| FINRISK 2007          | 1087   | -0.070   | 0.055  | 0.21      |
| FUSION                | 4236   | -0.010   | 0.028  | 0.71      |
| Health 2006/2008      | 3683   | -0.051   | 0.030  | 0.092     |
| Inter99               | 6077   | -0.026   | 0.024  | 0.29      |
| METSIM                | 8389   | -0.064   | 0.021  | 0.0020    |
| PPP                   | 4766   | -0.027   | 0.027  | 0.31      |
| SDC                   | 499    | 0.015    | 0.081  | 0.85      |
| VejeCases             | 1998   | 0.047    | 0.042  | 0.26      |
| VejeCtrl              | 430    | -0.12    | 0.094  | 0.21      |
| CCHS                  | 8032   | -0.026   | 0.018  | 0.14      |
| CGPS                  | 11774  | -0.021   | 0.015  | 0.17      |
| CIHDS                 | 1434   | 0.0027   | 0.045  | 0.95      |
| EPIC-InterAct         | 1069   | -0.019   | 0.059  | 0.75      |
| MORGAM                | 5742   | -0.048   | 0.022  | 0.031     |
| WOSCOPS               | 1323   | 0.055    | 0.051  | 0.27      |
| Summary               | 133827 | -0.027   | 0.0050 | 4.036e-08 |

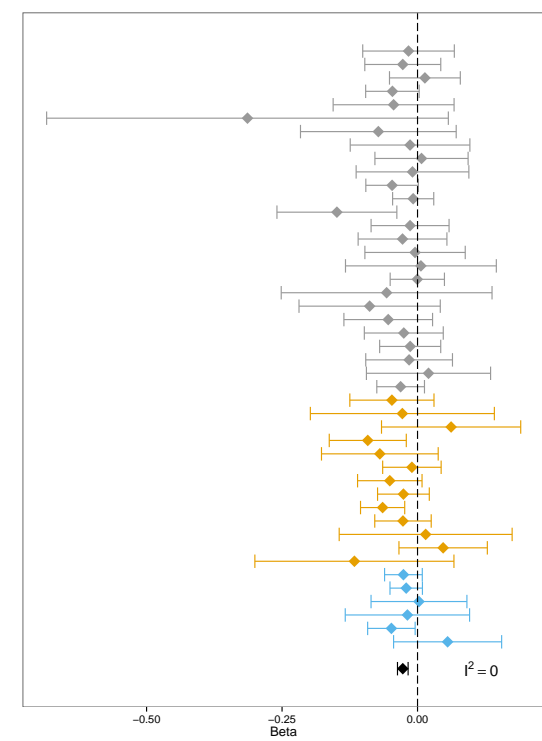rs167479 in *RGL3* association with DBP in EUR

| Study Name            | N      | Beta    | SE     | P-value   |
|-----------------------|--------|---------|--------|-----------|
| AIRWAVE               | 1902   | -0.034  | 0.032  | 0.29      |
| ASCOT_SC              | 2461   | -0.045  | 0.028  | 0.11      |
| ASCOT_UK              | 3245   | -0.024  | 0.025  | 0.34      |
| 1958BC                | 5864   | -0.087  | 0.019  | 0.0000029 |
| BRIGHT CASES          | 1105   | -0.061  | 0.044  | 0.16      |
| BRIGHT CONTROLS       | 127    | 0.064   | 0.14   | 0.63      |
| CROATIA-Korcula       | 820    | -0.088  | 0.051  | 0.083     |
| DIABNORD (GLACIER)    | 912    | 0.090   | 0.046  | 0.84      |
| EGCUT                 | 1785   | -0.021  | 0.034  | 0.53      |
| FENLAND controls      | 1170   | -0.022  | 0.042  | 0.59      |
| FINRISK97/02          | 5153   | -0.021  | 0.020  | 0.30      |
| GS-SFHS               | 9807   | -0.032  | 0.015  | 0.028     |
| GLACIER controls      | 922    | -0.0032 | 0.045  | 0.94      |
| GODARTS_diabetics     | 2657   | -0.065  | 0.027  | 0.017     |
| GODARTS_non diabetics | 2061   | -0.018  | 0.031  | 0.57      |
| GRAPHIC               | 1899   | -0.011  | 0.034  | 0.75      |
| HELICMANOLIS          | 961    | -0.012  | 0.047  | 0.80      |
| HUNT                  | 4735   | -0.0011 | 0.021  | 0.96      |
| LBC1921               | 359    | 0.081   | 0.079  | 0.31      |
| LBC1936               | 783    | -0.11   | 0.050  | 0.033     |
| LIFELINES             | 1948   | -0.071  | 0.032  | 0.025     |
| MDC                   | 8320   | -0.046  | 0.016  | 0.0032    |
| NFBC1986              | 1887   | 0.038   | 0.032  | 0.23      |
| OB                    | 4440   | -0.058  | 0.021  | 0.0054    |
| PIVUS/ULSAM           | 1998   | -0.046  | 0.031  | 0.14      |
| TwinsUK               | 1014   | -0.0079 | 0.043  | 0.85      |
| UKHLS                 | 7240   | -0.033  | 0.017  | 0.050     |
| ADDITION              | 2310   | -0.059  | 0.030  | 0.049     |
| DPS                   | 416    | -0.11   | 0.069  | 0.12      |
| DR's EXTRA            | 739    | -0.056  | 0.052  | 0.28      |
| FIN-D2D 2007          | 2570   | -0.066  | 0.029  | 0.021     |
| FINRISK 2007          | 1088   | -0.019  | 0.043  | 0.67      |
| FUSION                | 4237   | -0.0010 | 0.022  | 0.96      |
| Health 2006/2008      | 3709   | -0.062  | 0.023  | 0.0066    |
| Inter99               | 6078   | -0.045  | 0.019  | 0.015     |
| METSIM                | 8389   | -0.031  | 0.016  | 0.049     |
| PPP                   | 4766   | -0.061  | 0.021  | 0.0039    |
| SDC                   | 500    | -0.14   | 0.064  | 0.031     |
| SDR/ANDIS             | 2636   | -0.021  | 0.028  | 0.44      |
| VejeCases             | 2006   | -0.017  | 0.031  | 0.59      |
| VejeCtrl              | 431    | -0.036  | 0.068  | 0.60      |
| CCHS                  | 8070   | -0.034  | 0.014  | 0.017     |
| CGPS                  | 11783  | -0.022  | 0.012  | 0.061     |
| CIHDS                 | 1434   | -0.030  | 0.037  | 0.37      |
| EPIC-CVD              | 15674  | -0.022  | 0.010  | 0.030     |
| EPIC-InterAct         | 1078   | -0.058  | 0.042  | 0.16      |
| MORGAM                | 5757   | -0.023  | 0.018  | 0.20      |
| PROSPER               | 1275   | -0.023  | 0.037  | 0.54      |
| WOSCOPS               | 1337   | 0.023   | 0.037  | 0.54      |
| Summary               | 160583 | -0.034  | 0.0035 | 3.482e-22 |

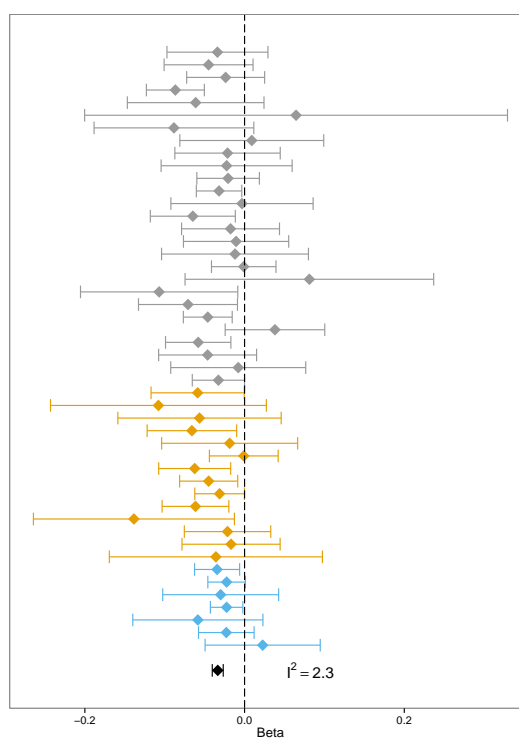rs2304130 in *ZNF101* association with DBP in EUR

| Study Name            | N      | Beta    | SE     | P-value   |
|-----------------------|--------|---------|--------|-----------|
| AIRWAVE               | 1902   | -0.061  | 0.057  | 0.28      |
| ASCOT_SC              | 2461   | 0.064   | 0.054  | 0.23      |
| ASCOT_UK              | 3245   | -0.042  | 0.043  | 0.33      |
| 1958BC                | 5864   | -0.032  | 0.032  | 0.32      |
| BRIGHT CASES          | 1105   | 0.13    | 0.073  | 0.078     |
| BRIGHT CONTROLS       | 127    | -0.25   | 0.24   | 0.29      |
| CROATIA-Korcula       | 827    | -0.16   | 0.11   | 0.15      |
| DIABNORD (GLACIER)    | 912    | 0.054   | 0.083  | 0.51      |
| EGCUT                 | 1785   | 0.067   | 0.069  | 0.34      |
| FENLAND controls      | 1170   | -0.13   | 0.068  | 0.067     |
| FINRISK97/02          | 5153   | -0.091  | 0.043  | 0.033     |
| GS-SFHS               | 9831   | -0.016  | 0.028  | 0.56      |
| GLACIER controls      | 922    | 0.036   | 0.087  | 0.68      |
| GODARTS_diabetics     | 2657   | -0.035  | 0.049  | 0.47      |
| GODARTS_non diabetics | 2061   | -0.068  | 0.057  | 0.23      |
| GRAPHIC               | 1899   | -0.18   | 0.062  | 0.0029    |
| HELICMANOLIS          | 961    | 0.080   | 0.094  | 0.39      |
| HUNT                  | 4735   | -0.030  | 0.035  | 0.38      |
| LBC1921               | 359    | 0.25    | 0.14   | 0.065     |
| LBC1936               | 783    | -0.026  | 0.083  | 0.78      |
| LIFELINES             | 1948   | -0.039  | 0.081  | 0.53      |
| MDC                   | 8309   | -0.059  | 0.025  | 0.018     |
| NFBC1986              | 1886   | -0.084  | 0.062  | 0.17      |
| OB                    | 4440   | -0.015  | 0.038  | 0.70      |
| PIVUS/ULSAM           | 1998   | 0.057   | 0.051  | 0.26      |
| TwinsUK               | 1014   | 0.031   | 0.075  | 0.68      |
| UKHLS                 | 7233   | -0.060  | 0.030  | 0.045     |
| ADDITION              | 2310   | 0.0049  | 0.050  | 0.92      |
| DPS                   | 416    | 0.19    | 0.14   | 0.15      |
| DR's EXTRA            | 739    | -0.056  | 0.11   | 0.61      |
| FIN-D2D 2007          | 2570   | -0.091  | 0.061  | 0.13      |
| FINRISK 2007          | 1088   | -0.28   | 0.093  | 0.0023    |
| FUSION                | 4237   | -0.0021 | 0.048  | 0.97      |
| Health 2006/2008      | 3709   | 0.017   | 0.040  | 0.67      |
| Inter99               | 6078   | -0.040  | 0.032  | 0.21      |
| METSIM                | 8389   | -0.11   | 0.036  | 0.0030    |
| PPP                   | 4766   | -0.027  | 0.037  | 0.47      |
| SDC                   | 500    | 0.15    | 0.10   | 0.14      |
| SDR/ANDIS             | 2636   | -0.064  | 0.042  | 0.13      |
| VejeCases             | 2006   | 0.039   | 0.054  | 0.47      |
| VejeCtrl              | 431    | -0.23   | 0.13   | 0.071     |
| CCHS                  | 8070   | -0.046  | 0.025  | 0.064     |
| CGPS                  | 11783  | -0.030  | 0.021  | 0.15      |
| CIHDS                 | 1434   | -0.0096 | 0.061  | 0.87      |
| EPIC-CVD              | 15674  | -0.042  | 0.020  | 0.035     |
| EPIC-InterAct         | 1078   | 0.011   | 0.081  | 0.89      |
| MORGAM                | 5757   | -0.027  | 0.037  | 0.47      |
| PROSPER               | 1275   | -0.12   | 0.071  | 0.083     |
| WOSCOPS               | 1337   | -0.086  | 0.072  | 0.24      |
| Summary               | 161870 | -0.036  | 0.0063 | 1.659e-08 |

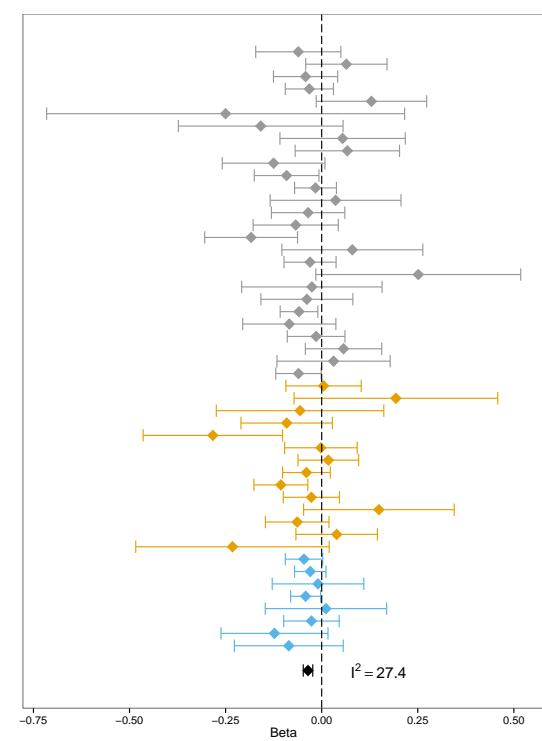

rs867186 in *PROCR* association with DBP in EUR

| Study Name            | N      | Beta    | SE     | P-value   |
|-----------------------|--------|---------|--------|-----------|
| AIRWAVE               | 1902   | 0.12    | 0.058  | 0.033     |
| ASCOT_SC              | 2461   | 0.10    | 0.044  | 0.019     |
| ASCOT_UK              | 3245   | 0.035   | 0.043  | 0.42      |
| 1958BC                | 5864   | 0.030   | 0.033  | 0.37      |
| BRIGHT CASES          | 1105   | -0.056  | 0.076  | 0.47      |
| BRIGHT CONTROLS       | 127    | 0.11    | 0.21   | 0.60      |
| CROATIA-Korcula       | 826    | 0.050   | 0.077  | 0.52      |
| DIABNORD (GLACIER)    | 912    | -0.044  | 0.075  | 0.56      |
| EGCUT                 | 1785   | 0.078   | 0.055  | 0.15      |
| FENLAND controls      | 1170   | 0.080   | 0.071  | 0.26      |
| FINRISK97/02          | 5153   | 0.032   | 0.029  | 0.26      |
| GS:SFHS               | 9828   | 0.065   | 0.028  | 0.023     |
| GLACIER controls      | 922    | 0.12    | 0.072  | 0.089     |
| GODARTS_diabetics     | 2657   | 0.082   | 0.050  | 0.10      |
| GODARTS_non diabetics | 2061   | 0.074   | 0.057  | 0.20      |
| GRAPHIC               | 1899   | -0.098  | 0.061  | 0.11      |
| HELICMANOLIS          | 961    | 0.074   | 0.075  | 0.32      |
| HUNT                  | 4735   | 0.047   | 0.032  | 0.14      |
| LBC1921               | 359    | 0.20    | 0.14   | 0.15      |
| LBC1936               | 783    | 0.13    | 0.090  | 0.15      |
| LIFELINES             | 1948   | 0.15    | 0.047  | 0.0017    |
| MDC                   | 8320   | -0.013  | 0.024  | 0.59      |
| NFBC1986              | 1887   | 0.024   | 0.047  | 0.61      |
| OB                    | 4440   | -0.027  | 0.038  | 0.47      |
| PIVUS/ULSAM           | 1998   | -0.10   | 0.048  | 0.031     |
| TwinsUK               | 1014   | 0.025   | 0.045  | 0.57      |
| UKHLS                 | 7239   | 0.019   | 0.029  | 0.52      |
| ADDITION              | 2310   | 0.058   | 0.046  | 0.21      |
| DPS                   | 416    | 0.11    | 0.11   | 0.31      |
| DR's EXTRA            | 739    | 0.052   | 0.078  | 0.50      |
| FIN-D2D 2007          | 2570   | 0.072   | 0.039  | 0.064     |
| FINRISK 2007          | 1088   | 0.0074  | 0.064  | 0.91      |
| FUSION                | 4237   | 0.058   | 0.032  | 0.069     |
| Health 2006/2008      | 3709   | 0.014   | 0.036  | 0.70      |
| Inter99               | 6078   | 0.029   | 0.028  | 0.30      |
| METSIM                | 8389   | 0.022   | 0.023  | 0.33      |
| PPP                   | 4766   | 0.032   | 0.029  | 0.27      |
| SDC                   | 500    | 0.16    | 0.096  | 0.087     |
| SDR/ANDIS             | 2636   | -0.039  | 0.041  | 0.34      |
| VeijleCases           | 2006   | -0.042  | 0.050  | 0.41      |
| VeijleCtrl            | 431    | -0.011  | 0.10   | 0.92      |
| CCHS                  | 8070   | 0.0042  | 0.023  | 0.85      |
| CGPS                  | 11783  | -0.0012 | 0.020  | 0.95      |
| CHIHS                 | 1434   | 0.012   | 0.056  | 0.84      |
| EPIC-CVD              | 15674  | 0.014   | 0.018  | 0.43      |
| EPIC-InterAct         | 1078   | 0.15    | 0.072  | 0.043     |
| MORGAM                | 5757   | 0.10    | 0.028  | 0.00023   |
| PROSPER               | 1275   | 0.022   | 0.067  | 0.74      |
| WOSCOPS               | 1337   | -0.082  | 0.068  | 0.23      |
| Summary               | 161885 | 0.028   | 0.0056 | 4.044e-07 |

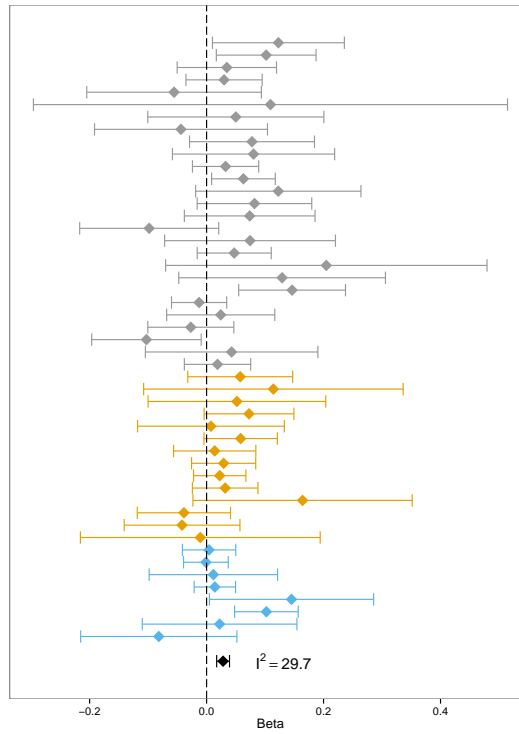rs6095241 in *PREX1* association with DBP in EUR

| Study Name            | N      | Beta     | SE     | P-value   |
|-----------------------|--------|----------|--------|-----------|
| AIRWAVE               | 1902   | -0.040   | 0.033  | 0.22      |
| ASCOT_UK              | 3245   | 0.0091   | 0.025  | 0.71      |
| 1958BC                | 5864   | 0.0046   | 0.019  | 0.81      |
| BRIGHT CASES          | 1105   | 0.010    | 0.043  | 0.81      |
| BRIGHT CONTROLS       | 127    | -0.096   | 0.14   | 0.49      |
| DIABNORD (GLACIER)    | 912    | 0.0015   | 0.049  | 0.97      |
| EGCUT                 | 1785   | -0.0021  | 0.035  | 0.95      |
| FENLAND controls      | 1170   | -0.084   | 0.042  | 0.046     |
| FINRISK97/02          | 5153   | -0.026   | 0.020  | 0.20      |
| GS:SFHS               | 9778   | -0.023   | 0.015  | 0.12      |
| GLACIER controls      | 922    | -0.070   | 0.049  | 0.16      |
| GODARTS_diabetics     | 2657   | -0.0093  | 0.028  | 0.74      |
| GODARTS_non diabetics | 2061   | -0.023   | 0.031  | 0.46      |
| GRAPHIC               | 1899   | -0.045   | 0.035  | 0.20      |
| HELICMANOLIS          | 961    | -0.036   | 0.047  | 0.44      |
| HUNT                  | 4735   | -0.024   | 0.020  | 0.24      |
| LBC1921               | 358    | -0.12    | 0.075  | 0.11      |
| LBC1936               | 781    | -0.040   | 0.051  | 0.43      |
| LIFELINES             | 1948   | -0.031   | 0.032  | 0.33      |
| MDC                   | 8319   | 0.0023   | 0.016  | 0.88      |
| NFBC1986              | 1887   | -0.032   | 0.032  | 0.33      |
| OB                    | 4440   | -0.051   | 0.021  | 0.015     |
| PIVUS/ULSAM           | 1998   | -0.034   | 0.032  | 0.29      |
| TwinsUK               | 1014   | 0.028    | 0.044  | 0.52      |
| UKHLS                 | 7239   | -0.040   | 0.017  | 0.017     |
| ADDITION              | 2310   | -0.024   | 0.030  | 0.42      |
| DPS                   | 416    | -0.018   | 0.073  | 0.80      |
| DR's EXTRA            | 739    | -0.00039 | 0.054  | 0.99      |
| FIN-D2D 2007          | 2570   | -0.030   | 0.029  | 0.29      |
| FINRISK 2007          | 1088   | -0.037   | 0.044  | 0.39      |
| FUSION                | 4237   | 0.00047  | 0.022  | 0.98      |
| Health 2006/2008      | 3709   | -0.025   | 0.024  | 0.29      |
| Inter99               | 6078   | -0.025   | 0.019  | 0.18      |
| METSIM                | 8382   | -0.037   | 0.016  | 0.021     |
| PPP                   | 4766   | -0.0052  | 0.021  | 0.80      |
| SDC                   | 500    | 0.060    | 0.065  | 0.36      |
| SDR/ANDIS             | 2636   | -0.018   | 0.028  | 0.53      |
| VeijleCases           | 2006   | -0.011   | 0.032  | 0.74      |
| VeijleCtrl            | 431    | 0.034    | 0.069  | 0.62      |
| CCHS                  | 8070   | 0.0050   | 0.015  | 0.73      |
| CGPS                  | 11783  | -0.00015 | 0.012  | 0.99      |
| CHIHS                 | 1434   | -0.045   | 0.037  | 0.22      |
| EPIC-CVD              | 15674  | -0.00048 | 0.011  | 0.97      |
| EPIC-InterAct         | 1078   | 0.030    | 0.043  | 0.49      |
| MORGAM                | 5757   | -0.00050 | 0.018  | 0.98      |
| PROSPER               | 1275   | -0.051   | 0.038  | 0.18      |
| WOSCOPS               | 1337   | -0.0020  | 0.038  | 0.96      |
| Summary               | 158536 | -0.015   | 0.0036 | 3.371e-05 |

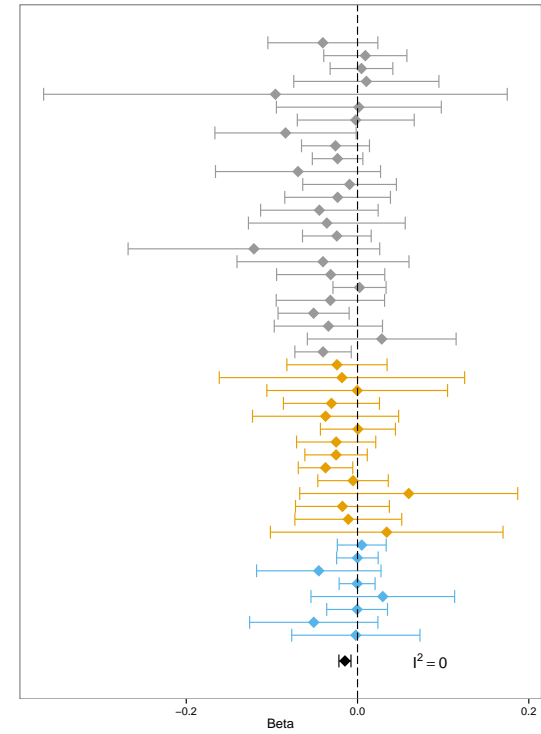rs9306160 in *RRP1B* association with DBP in EUR

| Study Name            | N      | Beta    | SE     | P-value   |
|-----------------------|--------|---------|--------|-----------|
| AIRWAVE               | 1902   | 0.0038  | 0.033  | 0.91      |
| ASCOT_SC              | 2459   | -0.068  | 0.030  | 0.023     |
| ASCOT_UK              | 3245   | 0.026   | 0.025  | 0.31      |
| 1958BC                | 5864   | -0.027  | 0.019  | 0.15      |
| BRIGHT CASES          | 1105   | -0.064  | 0.044  | 0.14      |
| BRIGHT CONTROLS       | 127    | 0.12    | 0.13   | 0.38      |
| CROATIA-Korcula       | 824    | -0.028  | 0.051  | 0.58      |
| DIABNORD (GLACIER)    | 912    | 0.021   | 0.051  | 0.70      |
| EGCUT                 | 1785   | -0.083  | 0.034  | 0.016     |
| FENLAND controls      | 1170   | -0.022  | 0.043  | 0.60      |
| FINRISK97/02          | 5153   | -0.036  | 0.021  | 0.094     |
| GS:SFHS               | 9804   | -0.024  | 0.015  | 0.10      |
| GLACIER controls      | 922    | -0.023  | 0.049  | 0.64      |
| GODARTS_diabetics     | 2657   | 0.0034  | 0.028  | 0.90      |
| GODARTS_non diabetics | 2061   | -0.0047 | 0.032  | 0.88      |
| GRAPHIC               | 1899   | -0.053  | 0.035  | 0.12      |
| HELICMANOLIS          | 961    | -0.012  | 0.047  | 0.80      |
| HUNT                  | 4735   | -0.028  | 0.021  | 0.18      |
| LBC1921               | 359    | 0.12    | 0.078  | 0.14      |
| LBC1936               | 783    | 0.0056  | 0.051  | 0.91      |
| LIFELINES             | 1948   | -0.039  | 0.033  | 0.25      |
| NFBC1986              | 1887   | -0.0047 | 0.034  | 0.89      |
| OB                    | 4440   | -0.026  | 0.021  | 0.23      |
| PIVUS/ULSAM           | 1998   | -0.026  | 0.033  | 0.43      |
| TwinsUK               | 1014   | 0.044   | 0.046  | 0.33      |
| UKHLS                 | 7239   | -0.019  | 0.017  | 0.26      |
| ADDITION              | 2310   | -0.079  | 0.030  | 0.0088    |
| DPS                   | 416    | 0.049   | 0.074  | 0.51      |
| DR's EXTRA            | 739    | -0.025  | 0.059  | 0.67      |
| FIN-D2D 2007          | 2570   | -0.0043 | 0.030  | 0.88      |
| FINRISK 2007          | 1088   | -0.0052 | 0.048  | 0.91      |
| FUSION                | 4237   | -0.026  | 0.023  | 0.27      |
| Health 2006/2008      | 3708   | 0.0018  | 0.024  | 0.94      |
| Inter99               | 6078   | 0.032   | 0.019  | 0.094     |
| METSIM                | 8383   | -0.011  | 0.017  | 0.52      |
| PPP                   | 4766   | -0.025  | 0.022  | 0.25      |
| SDC                   | 500    | -0.058  | 0.066  | 0.38      |
| SDR/ANDIS             | 2634   | -0.039  | 0.032  | 0.22      |
| VeijleCases           | 2006   | -0.067  | 0.072  | 0.35      |
| VeijleCtrl            | 431    | -0.0066 | 0.015  | 0.66      |
| CCHS                  | 8070   | -0.036  | 0.013  | 0.0039    |
| CGPS                  | 11783  | -0.0094 | 0.038  | 0.80      |
| CHIHS                 | 1434   | -0.0094 | 0.038  | 0.80      |
| EPIC-CVD              | 15674  | -0.017  | 0.011  | 0.11      |
| EPIC-InterAct         | 1078   | -0.039  | 0.045  | 0.39      |
| MORGAM                | 5757   | 0.0014  | 0.019  | 0.94      |
| PROSPER               | 1275   | -0.048  | 0.037  | 0.19      |
| WOSCOPS               | 1337   | -0.048  | 0.037  | 0.19      |
| Summary               | 149618 | -0.019  | 0.0037 | 5.538e-07 |

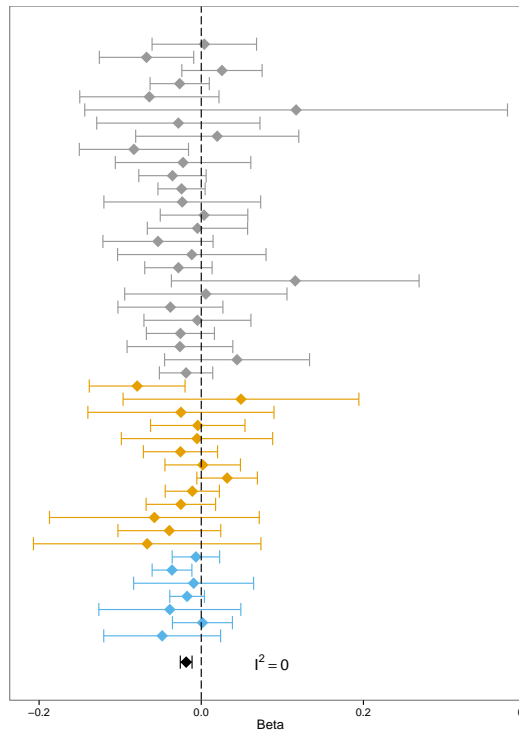rs470113 in *TNRC6B* association with PP in EUR

| Study Name            | N      | Beta    | SE     | P-value   |
|-----------------------|--------|---------|--------|-----------|
| AIRWAVE               | 1902   | -0.071  | 0.043  | 0.097     |
| ASCOT_SC              | 2461   | -0.010  | 0.036  | 0.77      |
| ASCOT_UK              | 3245   | -0.046  | 0.033  | 0.16      |
| 1958BC                | 5861   | -0.021  | 0.024  | 0.38      |
| BRIGHT CASES          | 1105   | -0.0054 | 0.058  | 0.92      |
| BRIGHT CONTROLS       | 127    | 0.18    | 0.20   | 0.36      |
| CROATIA-Korcula       | 824    | -0.0035 | 0.065  | 0.96      |
| DIABNORD (GLACIER)    | 912    | -0.14   | 0.054  | 0.0087    |
| EGCUT                 | 1785   | 0.018   | 0.041  | 0.67      |
| FENLAND controls      | 1170   | -0.040  | 0.050  | 0.42      |
| FINRISK97/02          | 5152   | -0.042  | 0.024  | 0.075     |
| GS:SFHS               | 9830   | -0.038  | 0.019  | 0.046     |
| GLACIER controls      | 922    | -0.019  | 0.054  | 0.73      |
| GODARTS_diabetics     | 2657   | -0.024  | 0.037  | 0.52      |
| GODARTS_non diabetics | 2061   | -0.045  | 0.041  | 0.27      |
| GRAPHIC               | 1899   | -0.11   | 0.045  | 0.015     |
| HELICMANOLIS          | 961    | -0.072  | 0.061  | 0.24      |
| HUNT                  | 4735   | -0.031  | 0.026  | 0.24      |
| LBC1921               | 359    | -0.016  | 0.092  | 0.87      |
| LBC1936               | 783    | 0.016   | 0.063  | 0.81      |
| LIFELINES             | 1948   | 0.038   | 0.038  | 0.34      |
| MDC                   | 8318   | -0.049  | 0.019  | 0.0098    |
| NFBC1986              | 1887   | -0.029  | 0.038  | 0.44      |
| OB                    | 4440   | -0.025  | 0.027  | 0.36      |
| PIVUS/ULSAM           | 1998   | -0.042  | 0.039  | 0.28      |
| TwinsUK               | 1014   | 0.038   | 0.056  | 0.50      |
| UKHLS                 | 7240   | 0.0072  | 0.021  | 0.74      |
| ADDITION              | 2309   | -0.033  | 0.037  | 0.37      |
| DPS                   | 416    | -0.16   | 0.082  | 0.047     |
| DR's EXTRA            | 739    | -0.090  | 0.062  | 0.15      |
| FIN-D2D 2007          | 2570   | -0.026  | 0.035  | 0.46      |
| FINRISK 2007          | 1088   | 0.012   | 0.053  | 0.82      |
| FUSION                | 4237   | -0.048  | 0.026  | 0.065     |
| Health 2006/2008      | 3709   | 0.020   | 0.030  | 0.51      |
| Inter99               | 6077   | -0.021  | 0.023  | 0.37      |
| METSIM                | 8389   | -0.039  | 0.019  | 0.039     |
| PPP                   | 4766   | 0.016   | 0.025  | 0.54      |
| SDC                   | 499    | -0.011  | 0.083  | 0.90      |
| SDR/ANDIS             | 2634   | 0.025   | 0.034  | 0.46      |
| VeijleCases           | 2000   | -0.12   | 0.039  | 0.0022    |
| VeijleCtrl            | 430    | 0.029   | 0.088  | 0.74      |
| CCHS                  | 8068   | -0.011  | 0.017  | 0.50      |
| CGPS                  | 11783  | -0.033  | 0.015  | 0.022     |
| CHIHS                 | 1434   | -0.0044 | 0.044  | 0.92      |
| EPIC-CVD              | 15672  | -0.030  | 0.013  | 0.019     |
| EPIC-InterAct         | 1077   | -0.051  | 0.054  | 0.35      |
| MORGAM                | 5757   | -0.045  | 0.022  | 0.037     |
| PROSPER               | 1275   | -0.0065 | 0.055  | 0.90      |
| WOSCOPS               | 1336   | 0.068   | 0.050  | 0.17      |
| Summary               | 161861 | -0.027  | 0.0043 | 2.254e-10 |

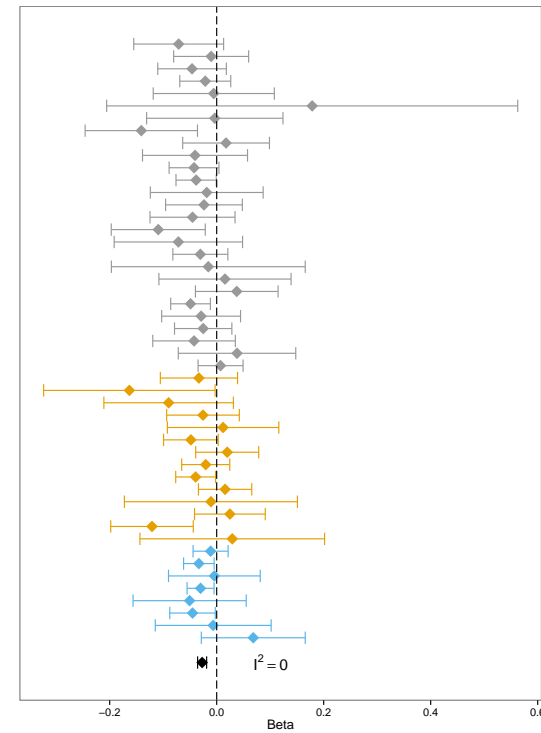



rs35529250 in *RBM47* association with SBP in ALL

| Study Name            | N      | Beta    | SE    | P-value   |
|-----------------------|--------|---------|-------|-----------|
| AIRWAVE               | 1902   | -0.31   | 0.24  | 0.19      |
| ASCOT_SC              | 2461   | -0.17   | 0.30  | 0.37      |
| ASCOT_UK              | 3245   | -0.24   | 0.17  | 0.16      |
| 1958BC                | 5864   | -0.18   | 0.12  | 0.15      |
| BRIGHT CASES          | 1105   | -0.18   | 0.25  | 0.48      |
| BRIGHT CONTROLS       | 127    | 0.98    | 1.1   | 0.37      |
| DIABNORD (GLACIER)    | 912    | -0.28   | 0.27  | 0.30      |
| EGCUT                 | 1785   | 0.57    | 0.36  | 0.11      |
| FENLAND controls      | 1170   | 0.025   | 0.24  | 0.92      |
| FINRISK97/02          | 5152   | -0.33   | 0.039 | 0.039     |
| GS-SFHS               | 9832   | -0.18   | 0.12  | 0.13      |
| GLACIER controls      | 922    | -1.3    | 0.40  | 0.0017    |
| GODARTS_diabetics     | 2657   | 0.11    | 0.19  | 0.58      |
| GODARTS_non diabetics | 2061   | 0.16    | 0.21  | 0.44      |
| GRAPHIC               | 1899   | -0.028  | 0.21  | 0.89      |
| HUNT                  | 4735   | -0.089  | 0.081 | 0.28      |
| LBC1921               | 359    | -0.70   | 0.59  | 0.24      |
| LBC1936               | 783    | 0.47    | 0.41  | 0.26      |
| LIFELINES             | 1948   | 0.022   | 0.17  | 0.90      |
| MDC                   | 8319   | -0.11   | 0.060 | 0.065     |
| OB                    | 4440   | 0.066   | 0.15  | 0.65      |
| PIVUS/ULSAM           | 1998   | -0.0033 | 0.14  | 0.98      |
| TwinsUK               | 1014   | 0.15    | 0.30  | 0.62      |
| UKHLS                 | 7240   | -0.10   | 0.32  | 0.13      |
| ADDITION              | 2310   | -0.10   | 0.12  | 0.41      |
| DPS                   | 416    | -1.5    | 0.44  | 0.0011    |
| FIN-D2D 2007          | 2570   | -0.19   | 0.21  | 0.38      |
| FINRISK 2007          | 1088   | 0.045   | 0.35  | 0.90      |
| FUSION                | 4237   | -0.14   | 0.17  | 0.41      |
| Health 2006/2008      | 3709   | -0.030  | 0.11  | 0.79      |
| Inter99               | 6080   | -0.069  | 0.087 | 0.42      |
| METSIM                | 8389   | -0.33   | 0.16  | 0.035     |
| PPP                   | 4766   | -0.10   | 0.12  | 0.38      |
| SDC                   | 500    | -0.12   | 0.24  | 0.62      |
| SDR/ANDIS             | 2636   | -0.050  | 0.10  | 0.63      |
| VejeCases             | 2000   | -0.20   | 0.14  | 0.16      |
| VejeCtrl              | 430    | -0.52   | 0.27  | 0.054     |
| CCHS                  | 8070   | -0.065  | 0.061 | 0.29      |
| CGPS                  | 11784  | -0.071  | 0.052 | 0.17      |
| CHIHS                 | 1436   | 0.088   | 0.16  | 0.59      |
| EPIC-CVD              | 15676  | -0.097  | 0.064 | 0.13      |
| EPIC-InterAct         | 1077   | -0.18   | 0.36  | 0.62      |
| MORGAM                | 5757   | 0.094   | 0.14  | 0.49      |
| PROSPER               | 1275   | -0.49   | 0.20  | 0.013     |
| WOSCOPS               | 1337   | 0.0045  | 0.29  | 0.99      |
| Summary               | 157473 | -0.095  | 0.019 | 6.556e-07 |

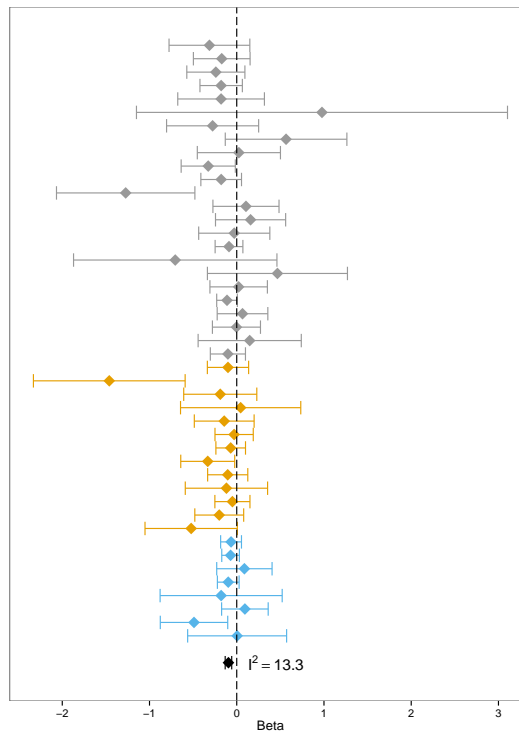rs4728142 in *Tq32.1* association with SBP in ALL

| Study Name            | N      | Beta    | SE     | P-value |
|-----------------------|--------|---------|--------|---------|
| AIRWAVE               | 1902   | -0.018  | 0.033  | 0.58    |
| ASCOT_SC              | 2461   | -0.025  | 0.028  | 0.37    |
| ASCOT_UK              | 3245   | 0.020   | 0.025  | 0.41    |
| 1958BC                | 5864   | -0.050  | 0.019  | 0.0078  |
| BRIGHT CASES          | 1105   | 0.041   | 0.043  | 0.34    |
| BRIGHT CONTROLS       | 127    | -0.013  | 0.13   | 0.92    |
| CROATIA-Korcula       | 822    | 0.081   | 0.053  | 0.12    |
| DIABNORD (GLACIER)    | 912    | -0.062  | 0.046  | 0.18    |
| EGCUT                 | 1785   | -0.027  | 0.034  | 0.42    |
| FENLAND controls      | 1170   | -0.028  | 0.10   | 0.61    |
| FINRISK97/02          | 5152   | 0.0036  | 0.020  | 0.86    |
| GS-SFHS               | 9822   | -0.0088 | 0.015  | 0.55    |
| GLACIER controls      | 922    | -0.016  | 0.049  | 0.74    |
| GODARTS_diabetics     | 2657   | -0.048  | 0.028  | 0.087   |
| GODARTS_non diabetics | 2061   | 0.0065  | 0.032  | 0.84    |
| GRAPHIC               | 1899   | -0.089  | 0.034  | 0.010   |
| HELICMANOLIS          | 961    | 0.00032 | 0.047  | 0.99    |
| HUNT                  | 4735   | -0.012  | 0.021  | 0.57    |
| LBC1921               | 359    | 0.18    | 0.077  | 0.023   |
| LBC1936               | 783    | -0.023  | 0.052  | 0.66    |
| LIFELINES             | 1948   | -0.042  | 0.032  | 0.19    |
| MDC                   | 8319   | -0.015  | 0.016  | 0.34    |
| NFBC1986              | 1886   | 0.0016  | 0.032  | 0.96    |
| OB                    | 4440   | -0.0025 | 0.021  | 0.90    |
| PIVUS/ULSAM           | 1998   | -0.036  | 0.031  | 0.26    |
| TwinsUK               | 1014   | 0.0074  | 0.045  | 0.87    |
| UKHLS                 | 7240   | -0.025  | 0.017  | 0.13    |
| ADDITION              | 2310   | -0.023  | 0.030  | 0.45    |
| DPS                   | 416    | -0.052  | 0.068  | 0.44    |
| DR's EXTRA            | 739    | 0.096   | 0.052  | 0.067   |
| FIN-D2D 2007          | 2570   | 0.0010  | 0.029  | 0.97    |
| FINRISK 2007          | 1088   | -0.067  | 0.045  | 0.14    |
| FUSION                | 4237   | 0.023   | 0.022  | 0.30    |
| Health 2006/2008      | 3709   | 0.0041  | 0.024  | 0.86    |
| Inter99               | 6080   | -0.029  | 0.018  | 0.11    |
| METSIM                | 8389   | -0.0098 | 0.016  | 0.55    |
| PPP                   | 4766   | -0.046  | 0.021  | 0.029   |
| SDC                   | 500    | -0.090  | 0.065  | 0.17    |
| SDR/ANDIS             | 2636   | 0.022   | 0.028  | 0.42    |
| VejeCases             | 2000   | -0.034  | 0.029  | 0.29    |
| VejeCtrl              | 430    | -0.029  | 0.069  | 0.67    |
| CCHS                  | 8070   | -0.0014 | 0.013  | 0.92    |
| CGPS                  | 11784  | -0.031  | 0.012  | 0.0077  |
| CHIHS                 | 1436   | 0.011   | 0.038  | 0.78    |
| EPIC-CVD              | 15676  | -0.018  | 0.010  | 0.086   |
| EPIC-InterAct         | 1077   | 0.053   | 0.044  | 0.23    |
| MORGAM                | 5757   | -0.0021 | 0.018  | 0.91    |
| PROSPER               | 1275   | 0.013   | 0.039  | 0.75    |
| WOSCOPS               | 1337   | 0.059   | 0.037  | 0.11    |
| BRAVE                 | 5250   | -0.012  | 0.019  | 0.52    |
| PROMIS                | 20687  | -0.021  | 0.0098 | 0.034   |
| Summary               | 187807 | -0.014  | 0.0032 | 8.1e-06 |

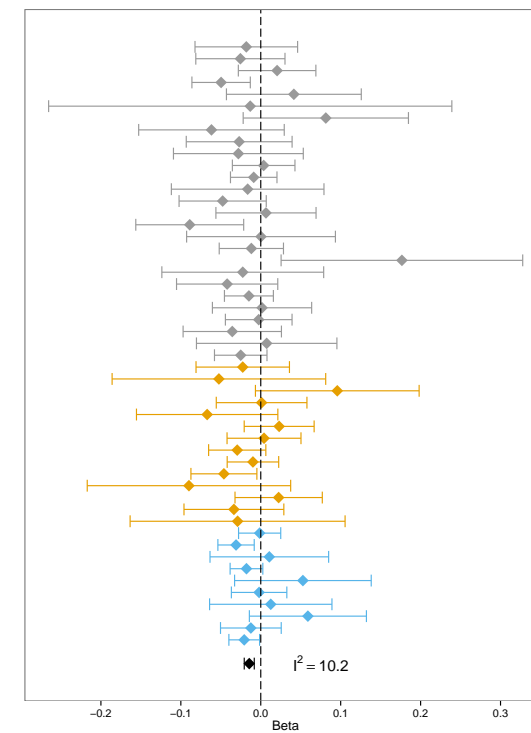rs4387287 in *OBFC1* association with SBP in ALL

| Study Name            | N      | Beta    | SE     | P-value  |
|-----------------------|--------|---------|--------|----------|
| AIRWAVE               | 1902   | 0.090   | 0.046  | 0.053    |
| ASCOT_SC              | 2461   | 0.025   | 0.040  | 0.53     |
| ASCOT_UK              | 3245   | 0.0072  | 0.034  | 0.83     |
| 1958BC                | 5864   | -0.0088 | 0.026  | 0.74     |
| BRIGHT CASES          | 1105   | 0.066   | 0.057  | 0.25     |
| BRIGHT CONTROLS       | 127    | 0.034   | 0.19   | 0.86     |
| CROATIA-Korcula       | 824    | 0.12    | 0.061  | 0.043    |
| DIABNORD (GLACIER)    | 912    | 0.10    | 0.079  | 0.19     |
| EGCUT                 | 1785   | 0.050   | 0.099  | 0.59     |
| FENLAND controls      | 1170   | -0.016  | 0.055  | 0.77     |
| FINRISK97/02          | 5152   | 0.020   | 0.028  | 0.47     |
| GS-SFHS               | 9817   | 0.027   | 0.020  | 0.19     |
| GLACIER controls      | 922    | 0.14    | 0.078  | 0.068    |
| GODARTS_diabetics     | 2657   | 0.031   | 0.039  | 0.42     |
| GODARTS_non diabetics | 2061   | -0.040  | 0.044  | 0.36     |
| GRAPHIC               | 1899   | -0.038  | 0.049  | 0.44     |
| HELICMANOLIS          | 961    | 0.067   | 0.055  | 0.22     |
| HUNT                  | 4735   | 0.060   | 0.029  | 0.041    |
| LBC1921               | 359    | -0.047  | 0.11   | 0.66     |
| LBC1936               | 783    | 0.065   | 0.069  | 0.35     |
| LIFELINES             | 1948   | -0.033  | 0.041  | 0.42     |
| MDC                   | 8320   | 0.029   | 0.021  | 0.17     |
| NFBC1986              | 1887   | -0.0094 | 0.047  | 0.84     |
| OB                    | 4440   | 0.0019  | 0.029  | 0.95     |
| PIVUS/ULSAM           | 1998   | 0.022   | 0.046  | 0.63     |
| TwinsUK               | 1014   | 0.078   | 0.061  | 0.20     |
| UKHLS                 | 7240   | 0.013   | 0.023  | 0.58     |
| DPS                   | 416    | -0.086  | 0.097  | 0.37     |
| DR's EXTRA            | 739    | 0.17    | 0.074  | 0.019    |
| FIN-D2D 2007          | 2570   | 0.059   | 0.040  | 0.14     |
| FINRISK 2007          | 1088   | -0.0089 | 0.061  | 0.88     |
| FUSION                | 4237   | 0.045   | 0.032  | 0.15     |
| METSIM                | 8388   | -0.0014 | 0.023  | 0.95     |
| PPP                   | 4766   | -0.031  | 0.032  | 0.33     |
| SDR/ANDIS             | 2636   | 0.062   | 0.038  | 0.10     |
| CCHS                  | 8070   | 0.039   | 0.018  | 0.030    |
| CGPS                  | 11784  | 0.025   | 0.016  | 0.11     |
| CHIHS                 | 1436   | 0.059   | 0.051  | 0.25     |
| EPIC-CVD              | 15676  | 0.013   | 0.014  | 0.32     |
| EPIC-InterAct         | 1077   | 0.10    | 0.057  | 0.072    |
| MORGAM                | 5757   | 0.041   | 0.024  | 0.092    |
| PROSPER               | 1275   | 0.097   | 0.062  | 0.12     |
| WOSCOPS               | 1337   | 0.082   | 0.057  | 0.15     |
| BRAVE                 | 5250   | -0.0031 | 0.022  | 0.89     |
| PROMIS                | 20687  | 0.041   | 0.013  | 0.0016   |
| Summary               | 172777 | 0.025   | 0.0045 | 2.23e-08 |

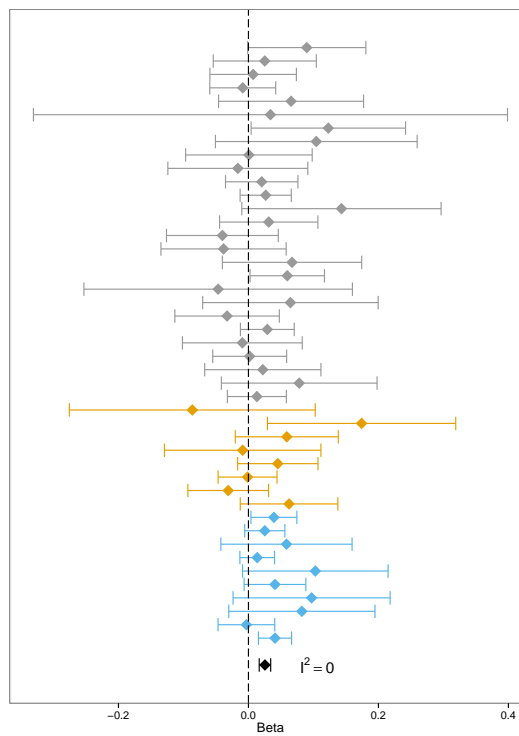rs1126930 in *PRKAG1* association with PP in ALL

| Study Name            | N      | Beta    | SE     | P-value   |
|-----------------------|--------|---------|--------|-----------|
| AIRWAVE               | 1902   | 0.13    | 0.082  | 0.11      |
| ASCOT_SC              | 2461   | 0.021   | 0.076  | 0.79      |
| ASCOT_UK              | 3245   | 0.051   | 0.062  | 0.41      |
| 1958BC                | 5861   | 0.086   | 0.048  | 0.074     |
| BRIGHT CASES          | 1105   | 0.097   | 0.11   | 0.38      |
| BRIGHT CONTROLS       | 127    | 0.58    | 0.53   | 0.28      |
| DIABNORD (GLACIER)    | 912    | 0.00036 | 0.096  | 1.0       |
| EGCUT                 | 1785   | -0.025  | 0.099  | 0.80      |
| FENLAND controls      | 1170   | -0.033  | 0.11   | 0.77      |
| GLACIER controls      | 922    | 0.018   | 0.10   | 0.86      |
| GODARTS_diabetics     | 2657   | 0.045   | 0.078  | 0.57      |
| GODARTS_non diabetics | 2061   | 0.13    | 0.088  | 0.13      |
| GRAPHIC               | 1899   | 0.15    | 0.10   | 0.15      |
| HELICMANOLIS          | 961    | 0.37    | 0.33   | 0.27      |
| HUNT                  | 4735   | 0.080   | 0.055  | 0.15      |
| LIFELINES             | 1948   | 0.088   | 0.078  | 0.26      |
| MDC                   | 8296   | 0.097   | 0.044  | 0.027     |
| NFBC1986              | 1886   | 0.11    | 0.098  | 0.26      |
| OB                    | 4440   | -0.050  | 0.056  | 0.38      |
| PIVUS/ULSAM           | 1998   | 0.17    | 0.089  | 0.054     |
| TwinsUK               | 1014   | -0.076  | 0.12   | 0.54      |
| UKHLS                 | 7239   | 0.025   | 0.047  | 0.60      |
| ADDITION              | 2309   | 0.17    | 0.073  | 0.023     |
| DPS                   | 416    | -0.050  | 0.23   | 0.83      |
| DR's EXTRA            | 739    | -0.0033 | 0.16   | 0.98      |
| FIN-D2D 2007          | 2570   | 0.11    | 0.084  | 0.17      |
| FINRISK 2007          | 1088   | -0.10   | 0.13   | 0.42      |
| FUSION                | 4237   | -0.017  | 0.082  | 0.79      |
| Health 2006/2008      | 3709   | 0.010   | 0.057  | 0.86      |
| Inter99               | 6077   | 0.076   | 0.047  | 0.11      |
| METSIM                | 8388   | 0.097   | 0.046  | 0.036     |
| SDC                   | 499    | -0.14   | 0.18   | 0.44      |
| VejeCases             | 2000   | -0.062  | 0.075  | 0.40      |
| VejeCtrl              | 430    | 0.070   | 0.19   | 0.71      |
| CCHS                  | 8070   | 0.039   | 0.033  | 0.23      |
| CGPS                  | 11783  | -0.015  | 0.030  | 0.61      |
| CHIHS                 | 1434   | 0.21    | 0.084  | 0.015     |
| EPIC-CVD              | 15673  | 0.017   | 0.027  | 0.52      |
| EPIC-InterAct         | 1077   | 0.13    | 0.13   | 0.31      |
| MORGAM                | 5757   | 0.13    | 0.052  | 0.015     |
| PROSPER               | 1275   | 0.15    | 0.10   | 0.14      |
| WOSCOPS               | 1337   | -0.080  | 0.11   | 0.47      |
| BRAVE                 | 5250   | 0.049   | 0.10   | 0.62      |
| PROMIS                | 20674  | 0.033   | 0.050  | 0.51      |
| Summary               | 163412 | 0.046   | 0.0096 | 2.115e-06 |

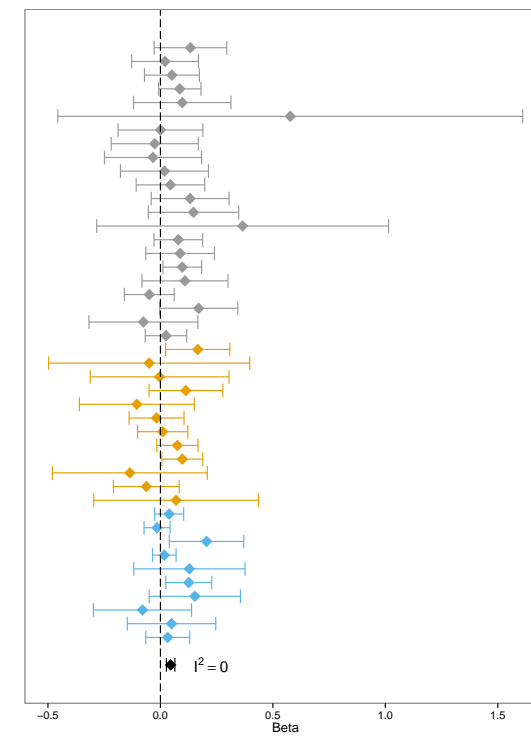

| Study Name            | N      | Beta     | SE     | P-value   |
|-----------------------|--------|----------|--------|-----------|
| AIRWAVE               | 1902   | -0.068   | 0.041  | 0.098     |
| ASCOT_SC              | 2461   | -0.035   | 0.036  | 0.33      |
| ASCOT_UK              | 3245   | 0.023    | 0.031  | 0.47      |
| 1958BC                | 5864   | 0.0098   | 0.023  | 0.67      |
| BRIGHT CASES          | 1105   | 0.0088   | 0.051  | 0.86      |
| BRIGHT CONTROLS       | 127    | -0.11    | 0.15   | 0.46      |
| CROATIA-Korcula       | 822    | 0.052    | 0.058  | 0.37      |
| DIABNORD (GLACIER)    | 912    | 0.019    | 0.059  | 0.75      |
| EGOUT                 | 1785   | 0.065    | 0.045  | 0.14      |
| FINLAND controls      | 1170   | -0.0033  | 0.052  | 0.95      |
| FINRISK97/02          | 5153   | -0.025   | 0.024  | 0.29      |
| GS-SFHS               | 9768   | -0.058   | 0.019  | 0.0024    |
| GLACIER controls      | 922    | -0.0070  | 0.058  | 0.90      |
| GODARTS_diabetics     | 2657   | -0.0017  | 0.035  | 0.96      |
| GODARTS_non diabetics | 2061   | -0.042   | 0.039  | 0.28      |
| HELICMANOLIS          | 961    | -0.14    | 0.052  | 0.0075    |
| HUNT                  | 4735   | 0.029    | 0.025  | 0.26      |
| LBC1921               | 359    | 0.027    | 0.094  | 0.78      |
| LBC1936               | 783    | -0.00016 | 0.062  | 1.0       |
| LIFELINES             | 1948   | -0.021   | 0.039  | 0.59      |
| MDC                   | 8320   | -0.054   | 0.019  | 0.0054    |
| NFBC1986              | 1887   | -0.041   | 0.037  | 0.26      |
| OB                    | 4440   | -0.020   | 0.026  | 0.45      |
| PIVUS/ULSAM           | 1936   | -0.13    | 0.039  | 0.0012    |
| TwinsUK               | 1014   | -0.14    | 0.057  | 0.013     |
| UKHLS                 | 7240   | -0.037   | 0.021  | 0.081     |
| ADDITION              | 2310   | 0.049    | 0.037  | 0.18      |
| DPS                   | 416    | 0.21     | 0.083  | 0.013     |
| DR's EXTRA            | 739    | 0.0029   | 0.062  | 0.96      |
| FIN-D2D 2007          | 2570   | 0.0025   | 0.036  | 0.94      |
| FINRISK 2007          | 1088   | 0.042    | 0.052  | 0.42      |
| FUSION                | 4237   | -0.034   | 0.026  | 0.20      |
| Health 2006/2008      | 3709   | -0.052   | 0.028  | 0.064     |
| Inter99               | 6078   | -0.051   | 0.023  | 0.024     |
| METSIM                | 8386   | -0.0018  | 0.019  | 0.92      |
| PPP                   | 4766   | -0.024   | 0.026  | 0.36      |
| SDC                   | 500    | 0.063    | 0.078  | 0.42      |
| SDR/ANDIS             | 2636   | -0.015   | 0.035  | 0.67      |
| VejleCases            | 2006   | -0.036   | 0.039  | 0.36      |
| VejleCtrl             | 431    | -0.060   | 0.088  | 0.49      |
| CCHS                  | 8070   | -0.016   | 0.018  | 0.37      |
| CGPS                  | 11783  | -0.0074  | 0.015  | 0.62      |
| CIHDS                 | 1434   | -0.051   | 0.044  | 0.25      |
| EPIC-CVD              | 15674  | -0.0039  | 0.013  | 0.76      |
| EPIC-InterAct         | 1078   | -0.029   | 0.055  | 0.60      |
| MORGAM                | 5757   | -0.047   | 0.022  | 0.036     |
| PROSPER               | 1275   | -0.0012  | 0.048  | 0.98      |
| WOSCOPS               | 1337   | -0.026   | 0.048  | 0.59      |
| BRAVE                 | 5250   | -0.017   | 0.023  | 0.45      |
| PROMIS                | 20677  | -0.016   | 0.011  | 0.15      |
| Summary               | 185846 | -0.020   | 0.0040 | 6.664e-07 |

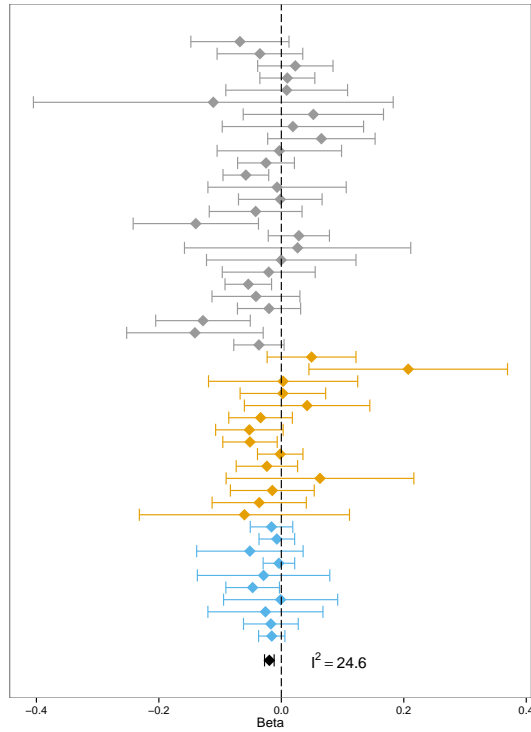

| Study Name            | N      | Beta   | SE    | P-value   |
|-----------------------|--------|--------|-------|-----------|
| AIRWAVE               | 1902   | 0.073  | 0.22  | 0.74      |
| ASCOT_SC              | 2461   | -0.012 | 0.18  | 0.95      |
| ASCOT_UK              | 3245   | 0.14   | 0.15  | 0.33      |
| 1958BC                | 5864   | 0.19   | 0.11  | 0.090     |
| BRIGHT CASES          | 1105   | 0.54   | 0.23  | 0.020     |
| CROATIA-Korcula       | 827    | 0.037  | 0.26  | 0.89      |
| DIABNORD (GLACIER)    | 912    | 0.24   | 0.18  | 0.17      |
| EGOUT                 | 1785   | 0.30   | 0.18  | 0.088     |
| FINLAND controls      | 1170   | 0.39   | 0.22  | 0.079     |
| GS-SFHS               | 9822   | 0.057  | 0.10  | 0.57      |
| GLACIER controls      | 922    | 0.21   | 0.23  | 0.35      |
| GODARTS_diabetics     | 2657   | 0.013  | 0.17  | 0.94      |
| GODARTS_non diabetics | 2061   | 0.33   | 0.20  | 0.10      |
| GRAPHIC               | 1899   | 0.12   | 0.17  | 0.50      |
| HELICMANOLIS          | 961    | -0.19  | 0.42  | 0.66      |
| HUNT                  | 4735   | 0.22   | 0.095 | 0.023     |
| LBC1921               | 359    | 0.96   | 0.42  | 0.022     |
| LBC1936               | 783    | 0.40   | 0.30  | 0.18      |
| LIFELINES             | 1948   | 0.17   | 0.19  | 0.37      |
| MDC                   | 8303   | 0.14   | 0.073 | 0.066     |
| NFBC1986              | 1887   | 0.16   | 0.19  | 0.41      |
| OB                    | 4440   | -0.026 | 0.14  | 0.86      |
| PIVUS/ULSAM           | 1998   | 0.34   | 0.20  | 0.082     |
| TwinsUK               | 1014   | 0.18   | 0.26  | 0.48      |
| ADDITION              | 2310   | -0.16  | 0.16  | 0.32      |
| DR's EXTRA            | 739    | -0.27  | 0.45  | 0.55      |
| FIN-D2D 2007          | 2570   | -0.18  | 0.19  | 0.34      |
| FINRISK 2007          | 1088   | 0.10   | 0.35  | 0.78      |
| FUSION                | 4237   | -0.11  | 0.17  | 0.50      |
| Health 2006/2008      | 3709   | -0.091 | 0.14  | 0.51      |
| Inter99               | 6080   | 0.15   | 0.096 | 0.13      |
| METSIM                | 8388   | -0.31  | 0.17  | 0.073     |
| PPP                   | 4766   | 0.085  | 0.11  | 0.45      |
| SDC                   | 500    | 0.12   | 0.38  | 0.75      |
| SDR/ANDIS             | 2636   | -0.016 | 0.15  | 0.91      |
| VejleCases            | 2000   | 0.14   | 0.18  | 0.43      |
| VejleCtrl             | 430    | 0.26   | 0.36  | 0.46      |
| CCHS                  | 8070   | 0.016  | 0.069 | 0.82      |
| CGPS                  | 11784  | 0.11   | 0.058 | 0.050     |
| CIHDS                 | 1436   | -0.10  | 0.18  | 0.56      |
| EPIC-CVD              | 15676  | 0.10   | 0.054 | 0.062     |
| MORGAM                | 5757   | 0.17   | 0.10  | 0.11      |
| PROSPER               | 1275   | 0.20   | 0.24  | 0.41      |
| WOSCOPS               | 1337   | -0.16  | 0.22  | 0.46      |
| BRAVE                 | 5250   | -0.19  | 0.35  | 0.59      |
| PROMIS                | 20687  | -0.097 | 0.24  | 0.68      |
| Summary               | 173785 | 0.095  | 0.020 | 1.963e-06 |

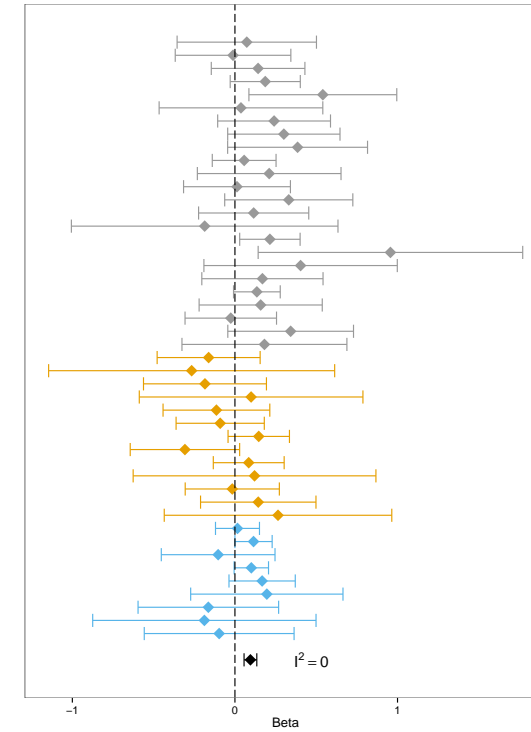

**Supplementary Figure 4. Locus zoom plots for 30 novel blood pressure variants.**

For each novel variant, the plot on the left indicates the discovery association results with the transformed validated trait (see table 1) in European (EUR) samples. The plot on the right is the association results with the transformed validated trait in EUR-South Asian (SAS) samples. LD was calculated for both EUR and EUR\_SAS using CHD Exome+ EUR dataset. Each circle represents a SNV passing quality control in the discovery meta-analysis plotted with its P value (on a  $-\log_{10}$  scale) on the y-axis and genomic position (NCBI Build 37) on the x-axis. The lead SNV (novel BP variant) is represented by the purple symbol. The color-coding of all other SNVs is indicated by linkage disequilibrium (LD) with the lead SNV.



rs709209 (*RNF207*) association with PP

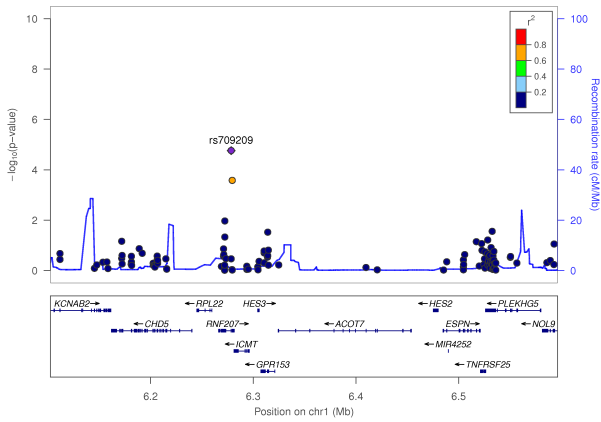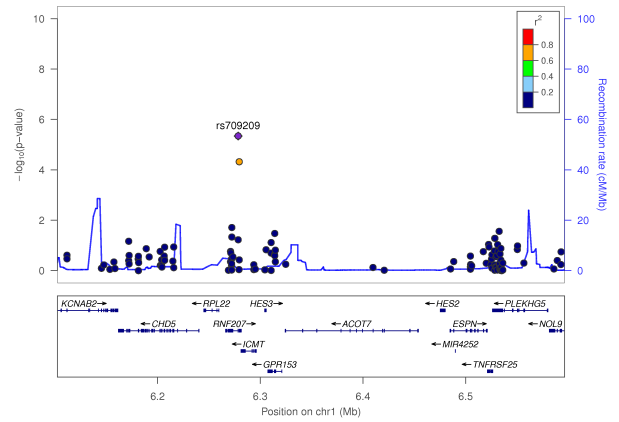

rs2972146 (2q36.3) association with DBP

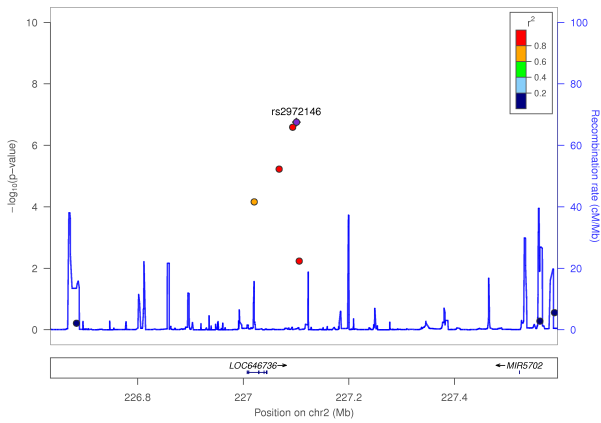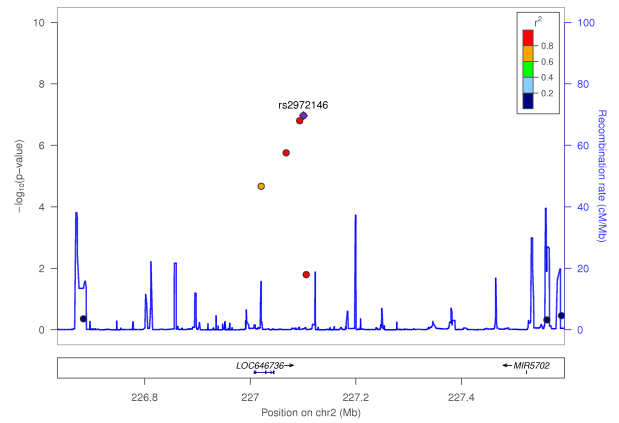

rs16851397 (*ZBTB38*) association with DBP

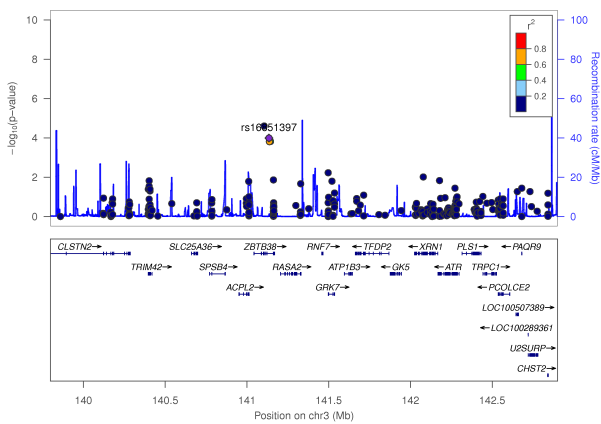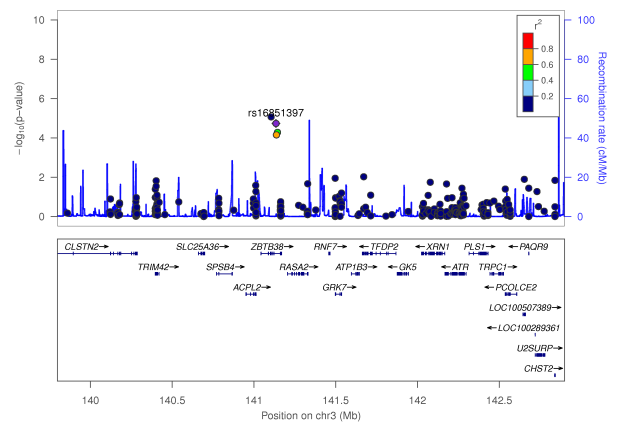

rs1008058 (*PRDM6*) association with SBP

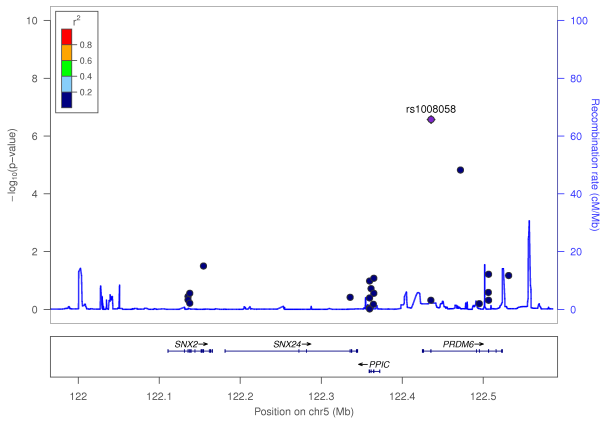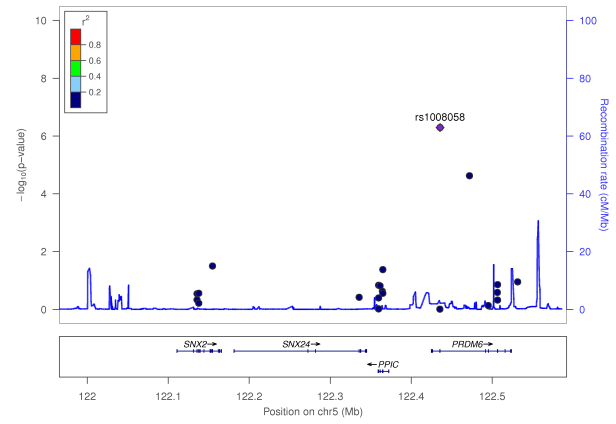

rs12521868 (*c5orf56*) association with DBP

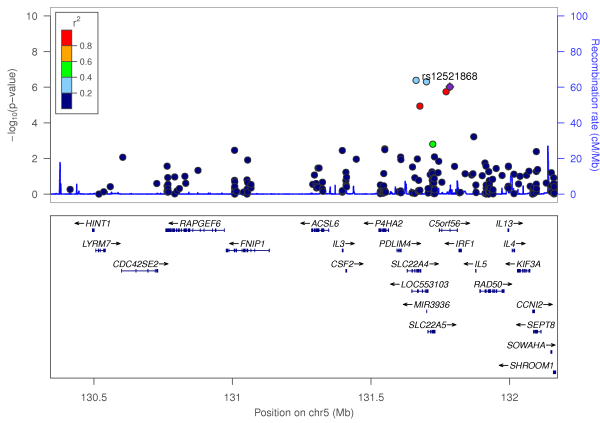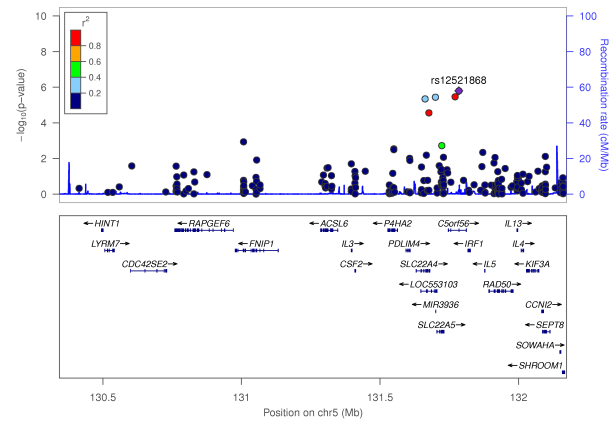

rs9349379 (*PHACTR1*) association with SBP

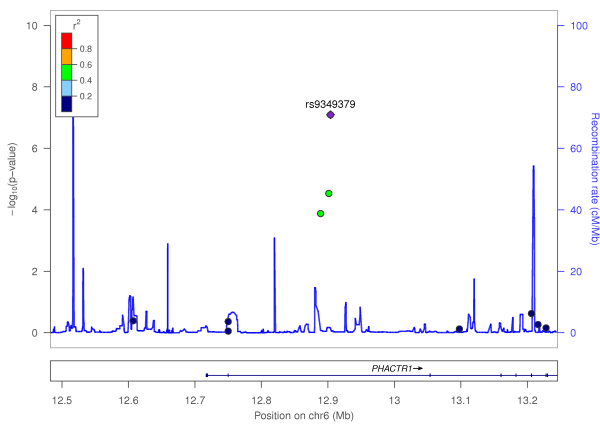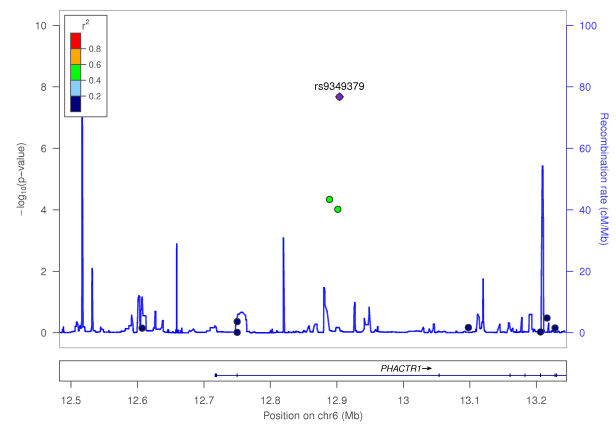

rs200999181 (*COL21A1*) association with PP

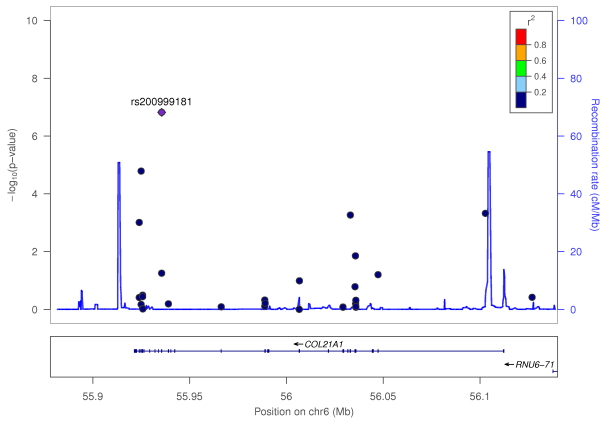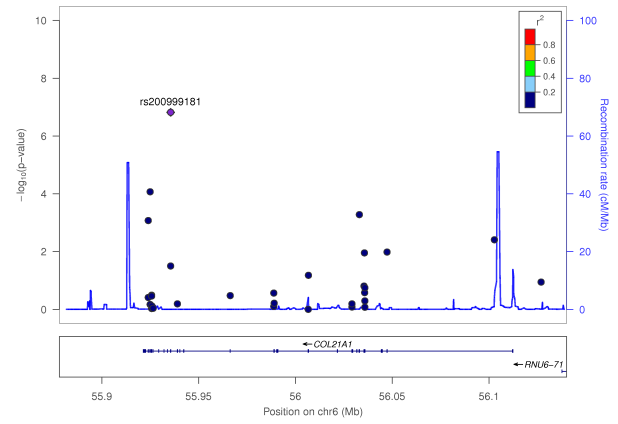

rs34591516 (*GPR20*) association with SBP

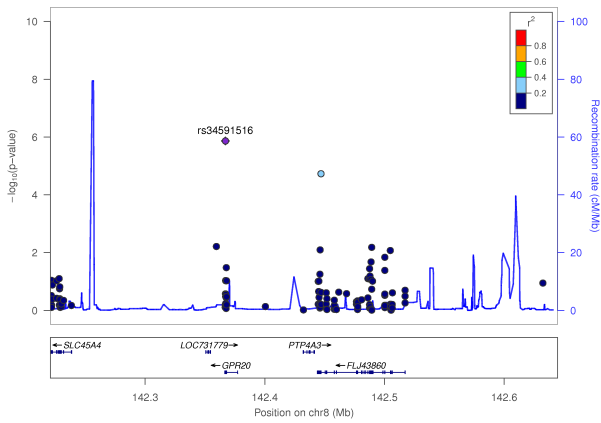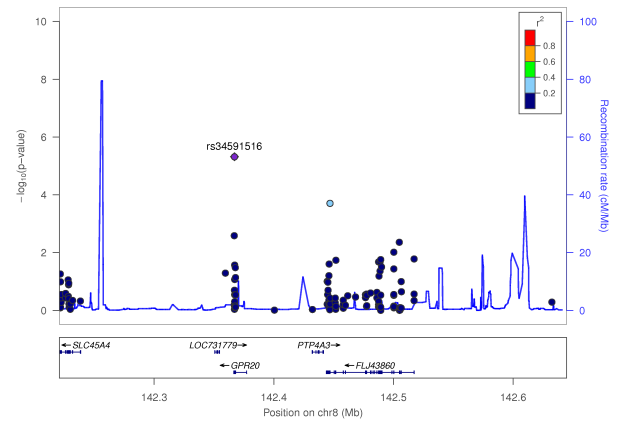

rs687621 (*ABO*) association with DBP

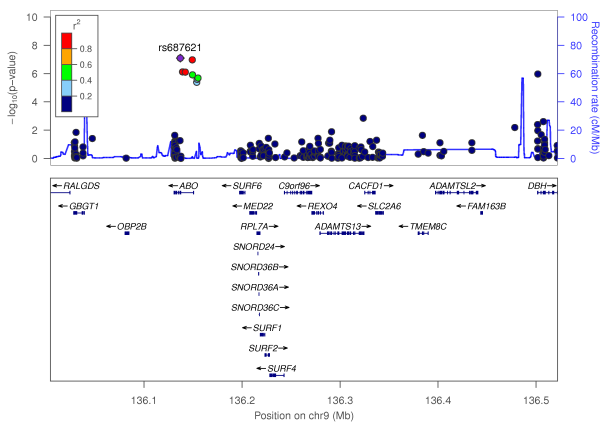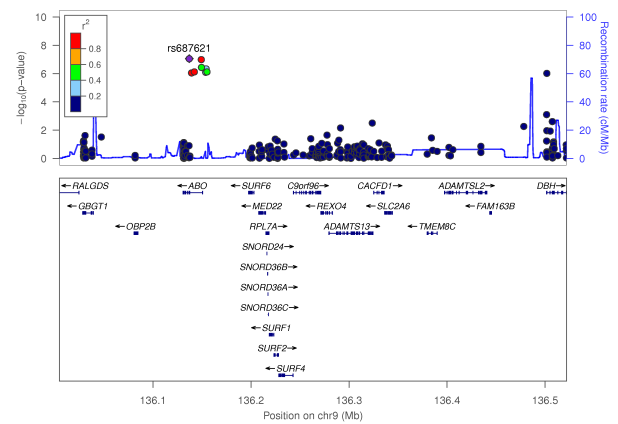

rs10995311 (*ADO*) association with DBP

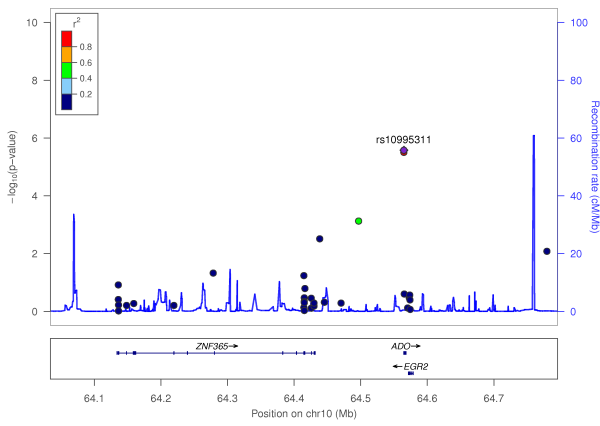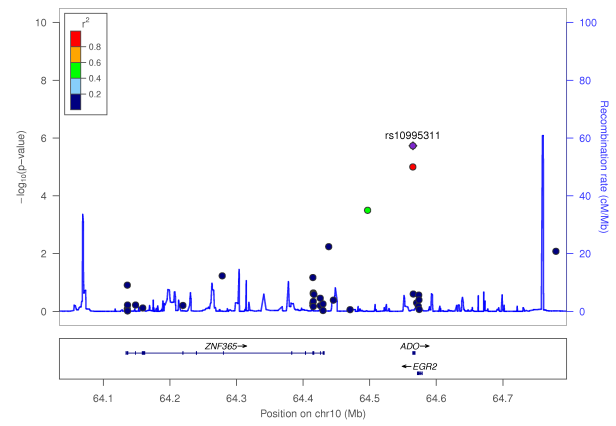

rs110419 (*LMO1*) association with DBP

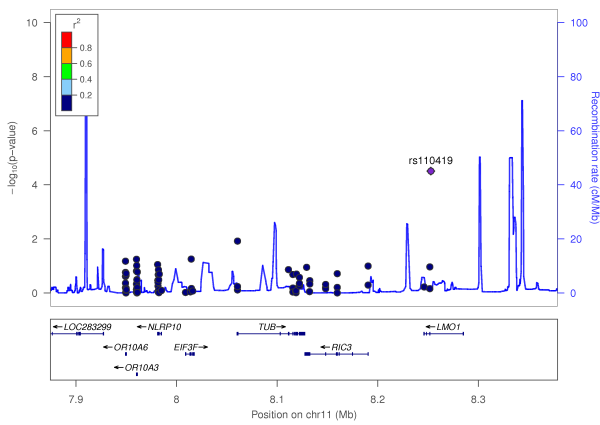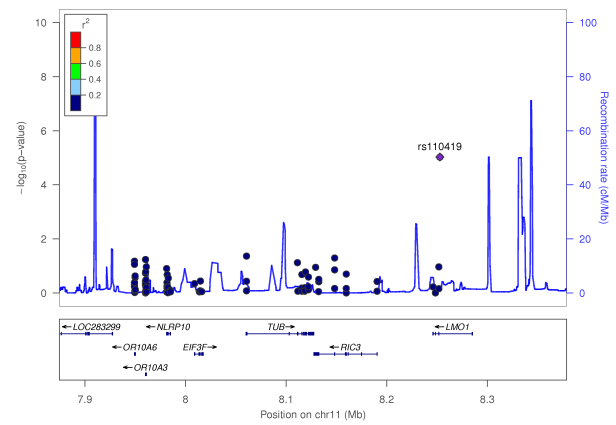

rs11229457 (*OR5B12*) association with SBP

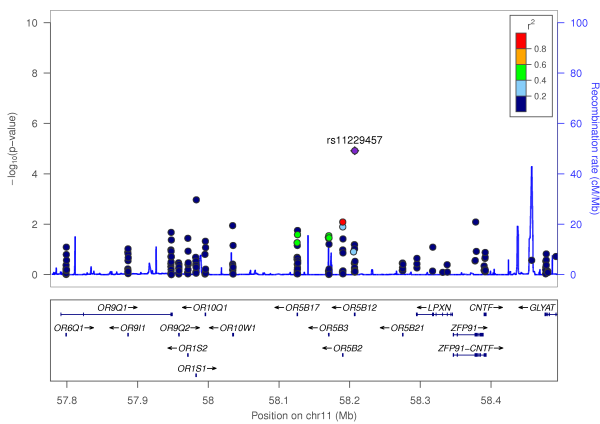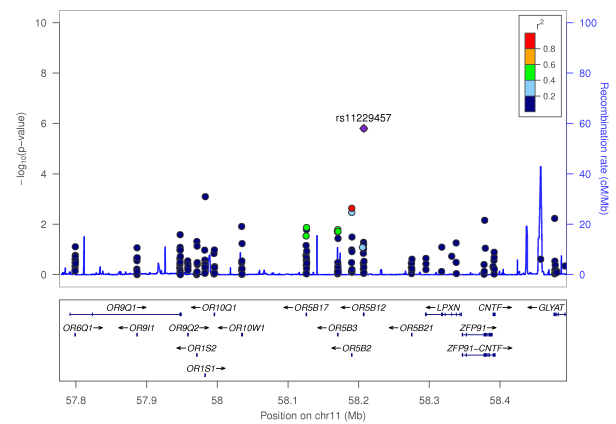

rs7302981 (*CERS5*) association with DBP

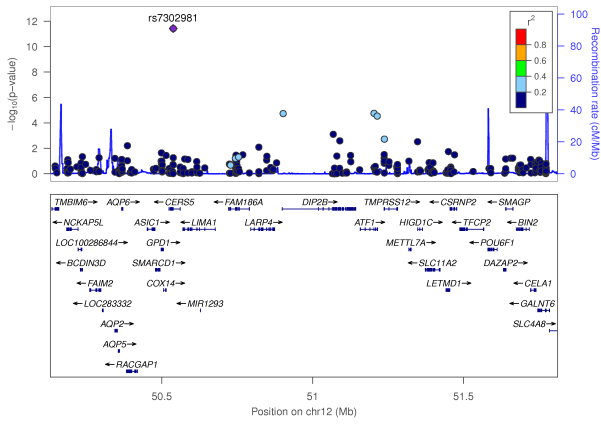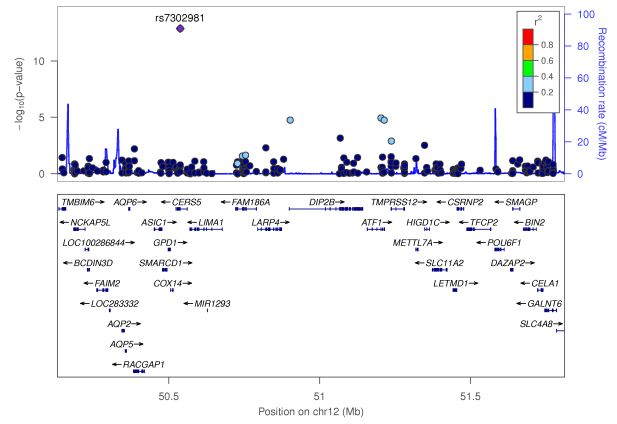

rs452036 (*MYH6*) association with PP

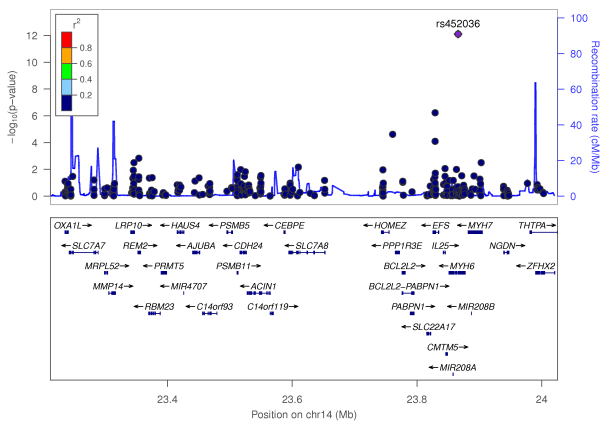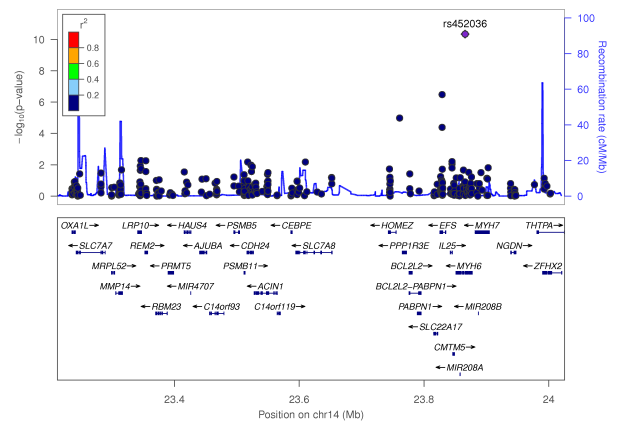

rs1126464 (*DPEP1*) association with DBP

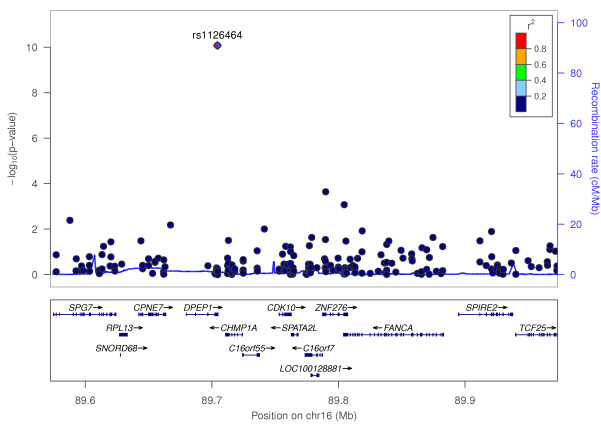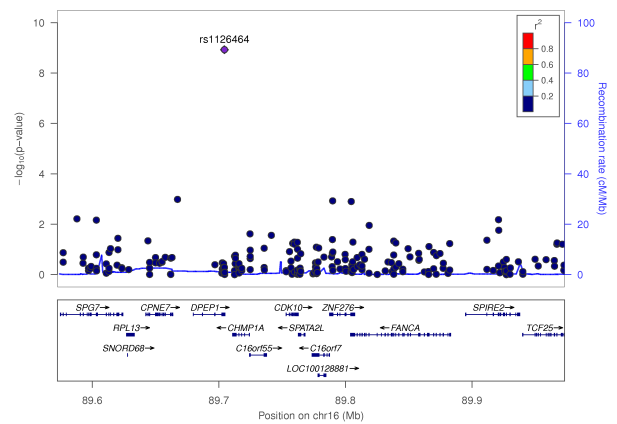

rs7406910 (*HOXB7*) association with SBP

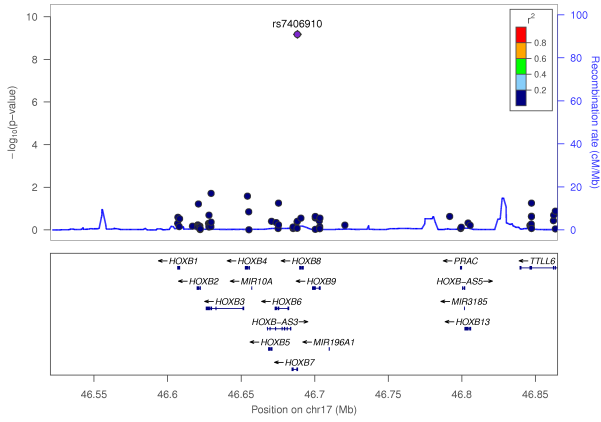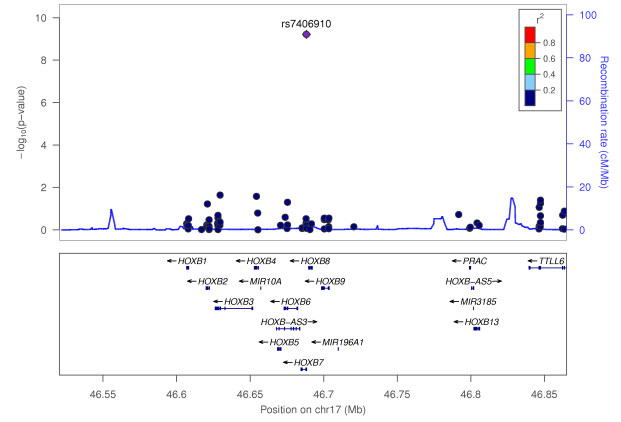

rs8068318 (*TBX2*) association with DBP

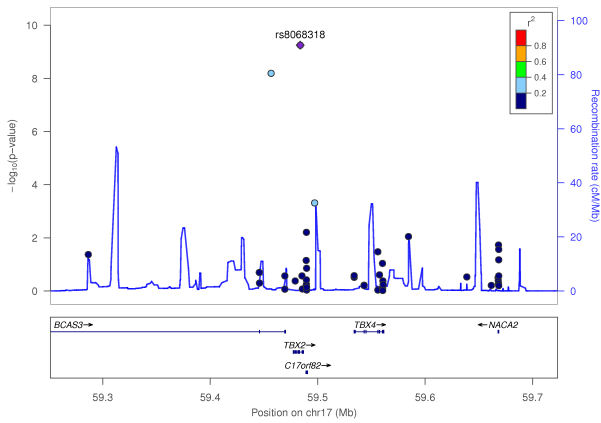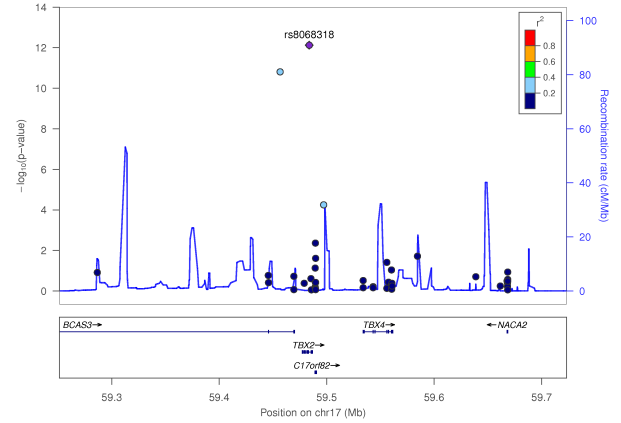

rs10407022 (*AMH*) association with PP

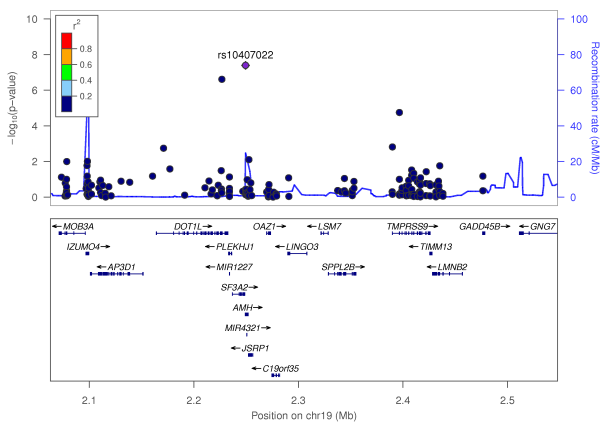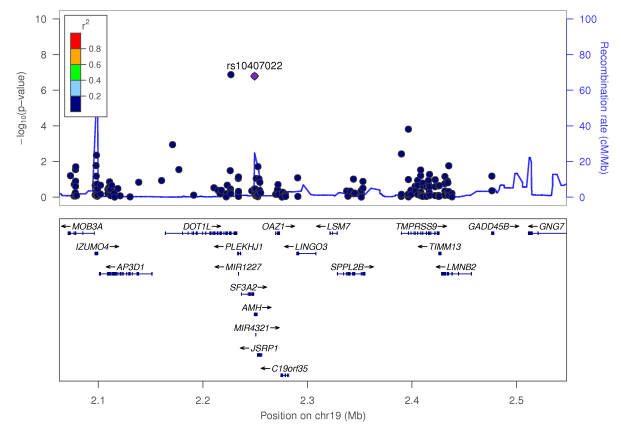

rs167479 (*RGL3*) association with DBP

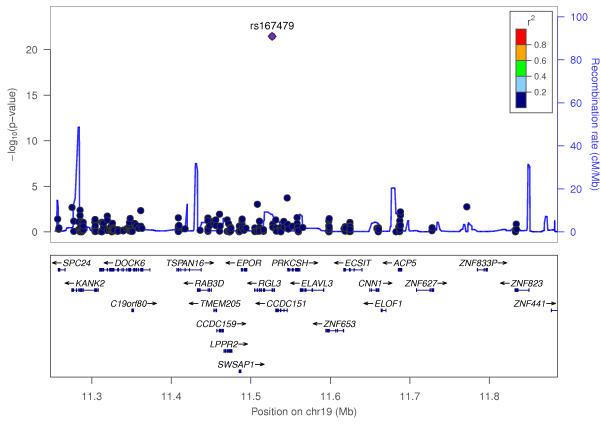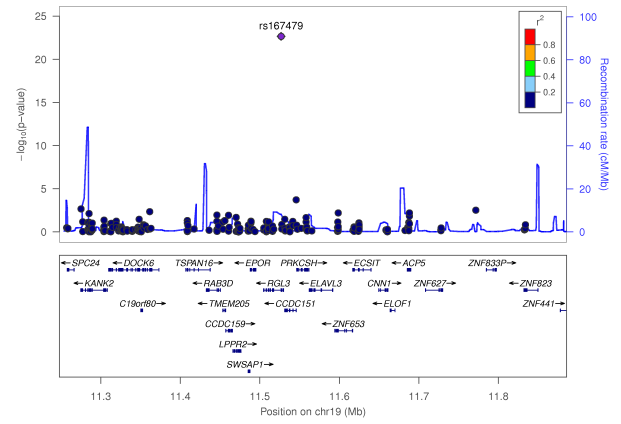

rs2304130 (*ZNF101*) association with DBP

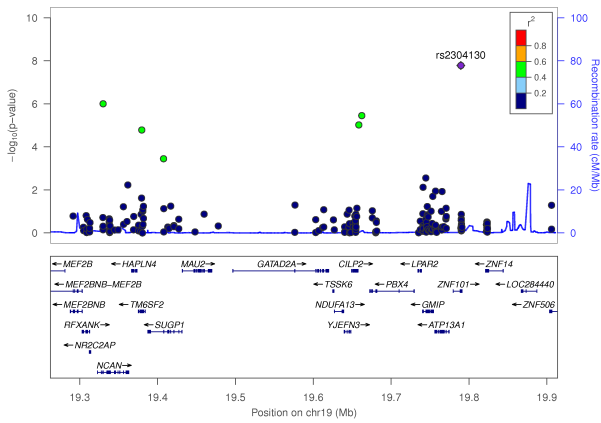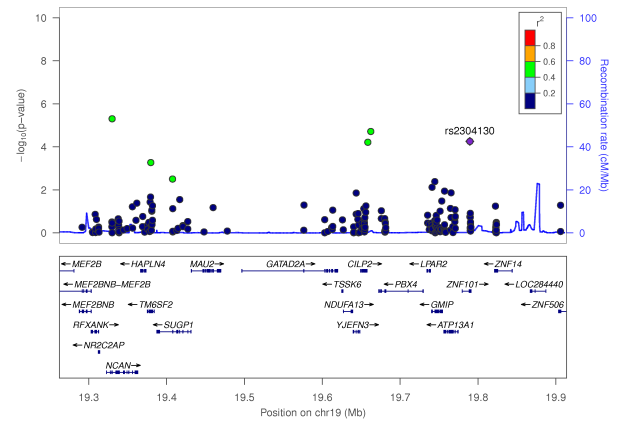

rs867186 (*PROCR*) association with DBP

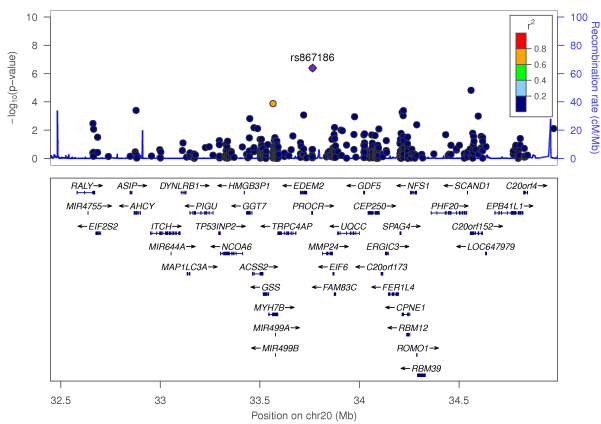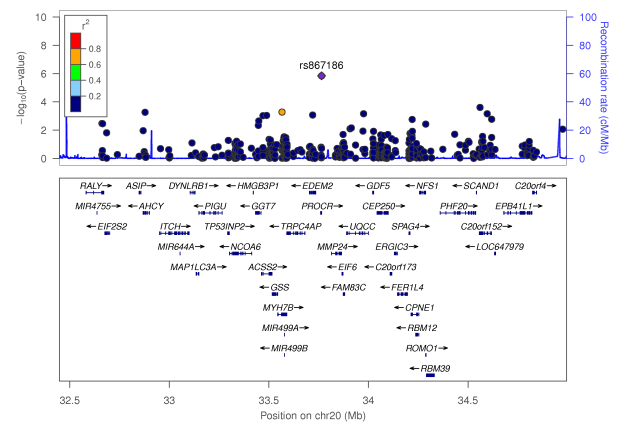

rs6095241 (*PREX1*) association with DBP

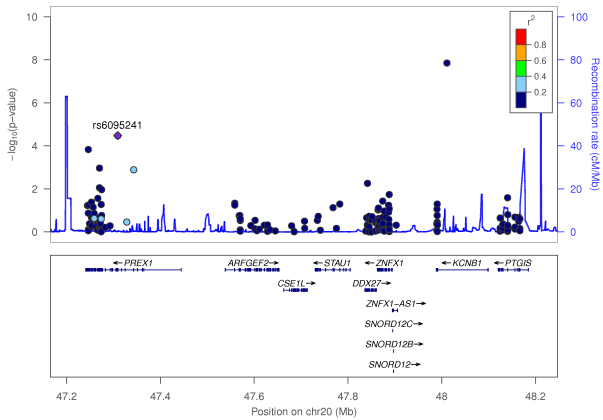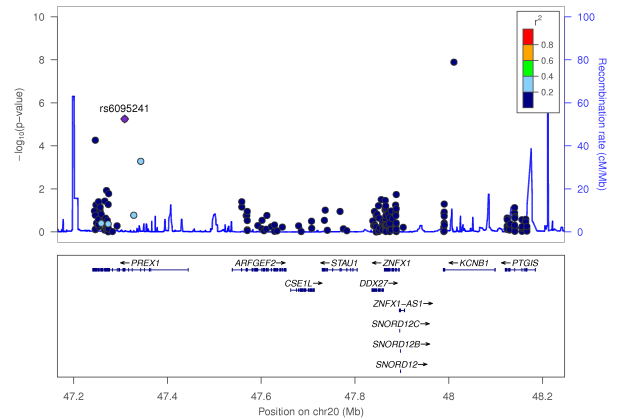

rs9306160 (*RRP1B*) association with DBP

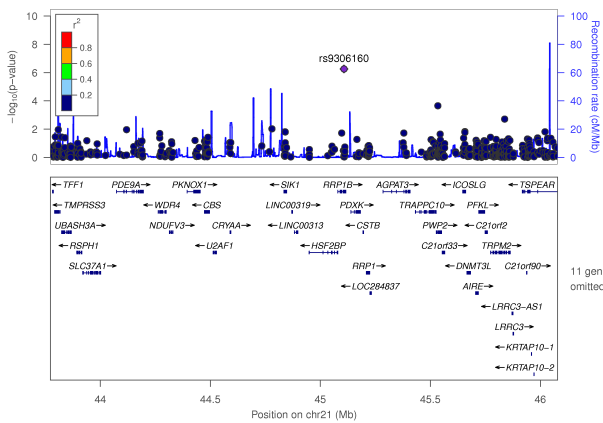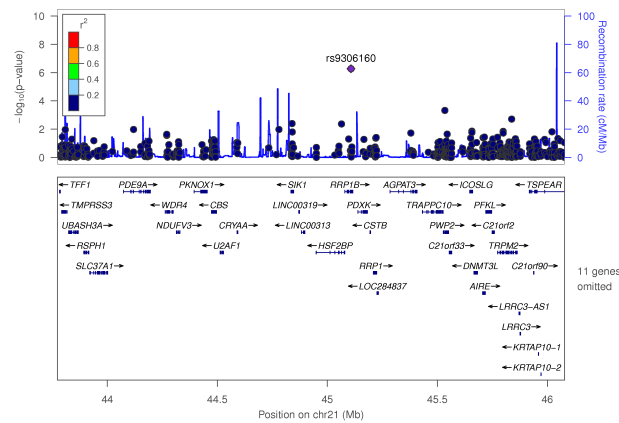

rs470113 (*TNRC6B*) association with PP

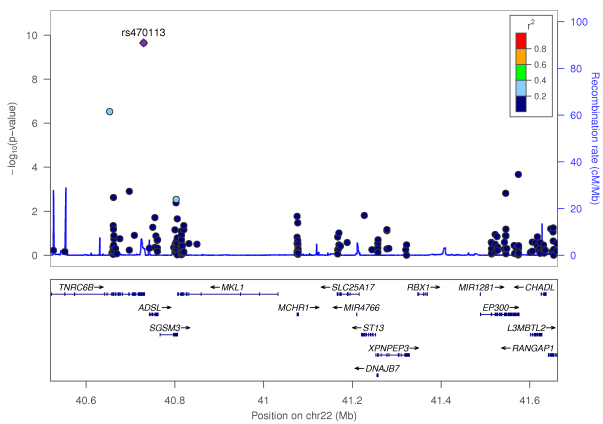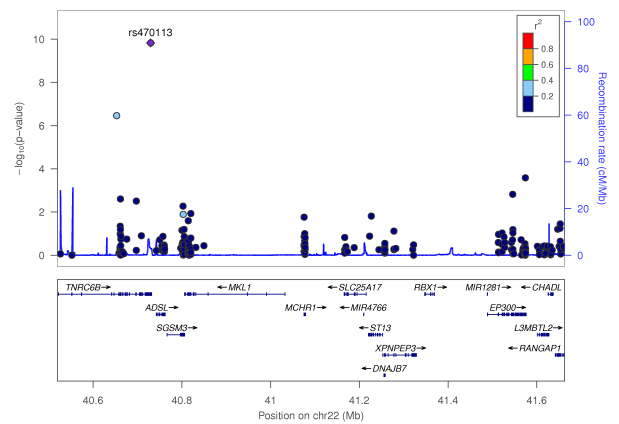



rs35529250 (*RBM47*) association with SBP

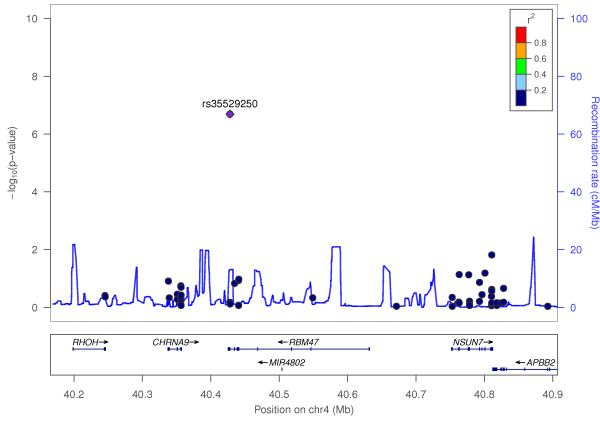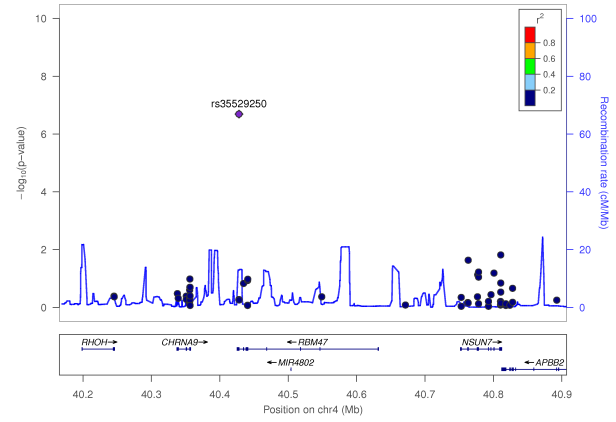

rs4728142 (7q32.1) association with SBP

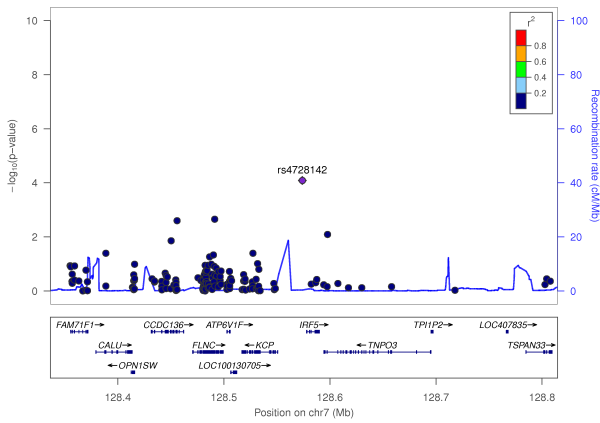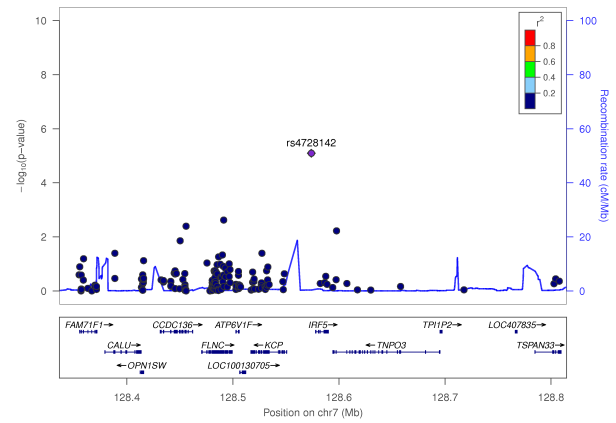

rs4387287 (*OBFC1*) association with SBP

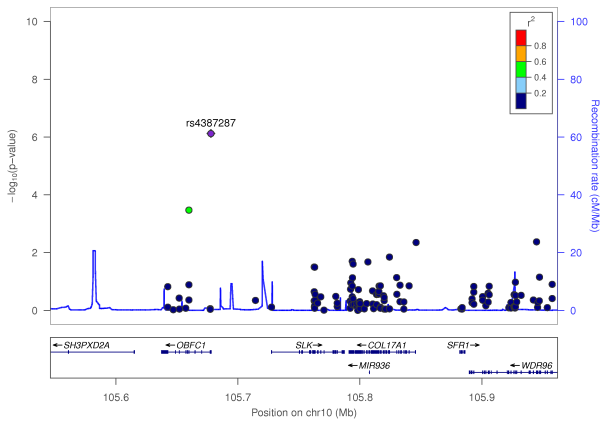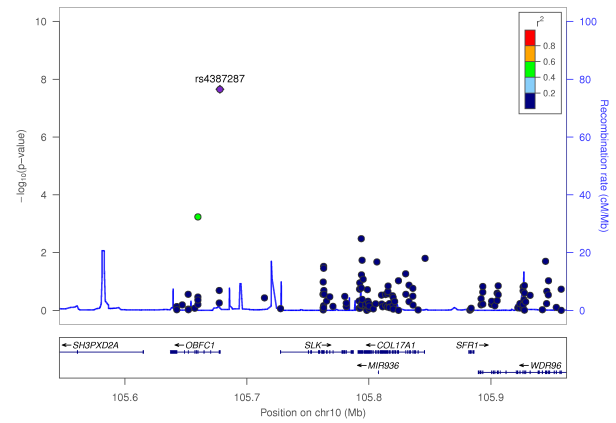

rs1126930 (*PRKAG1*) association with PP

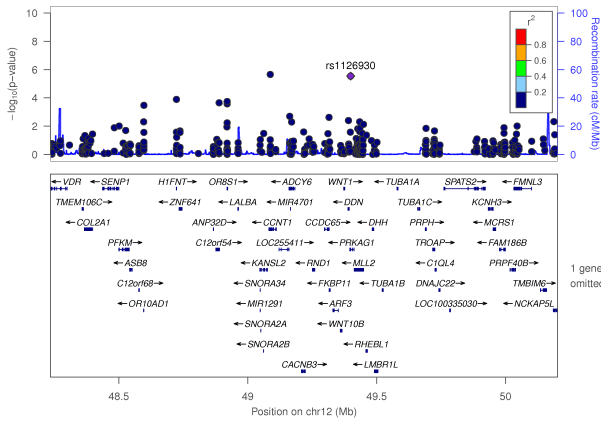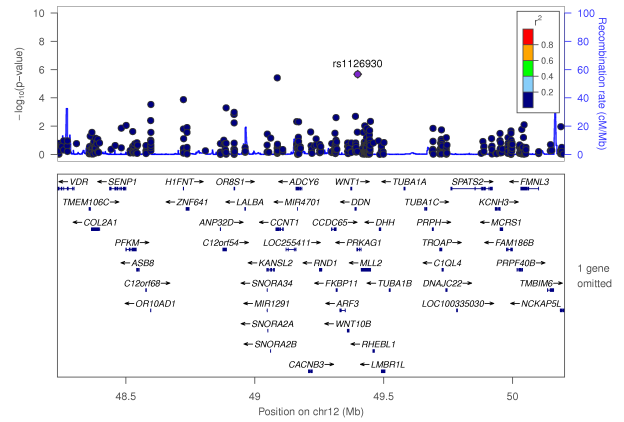

rs1060105 (*SBNO1*) association with DBP

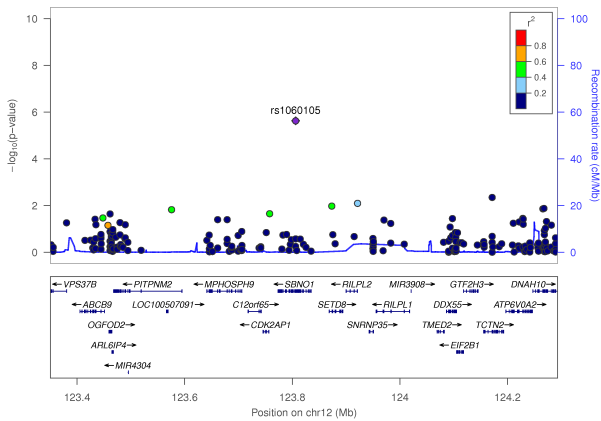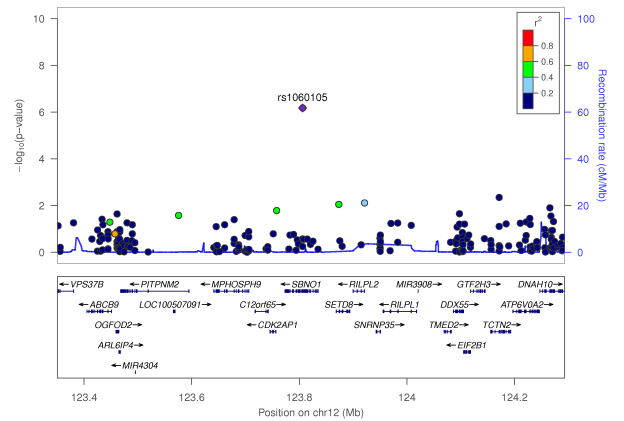

rs61760904 (*RRAS*) association with SBP

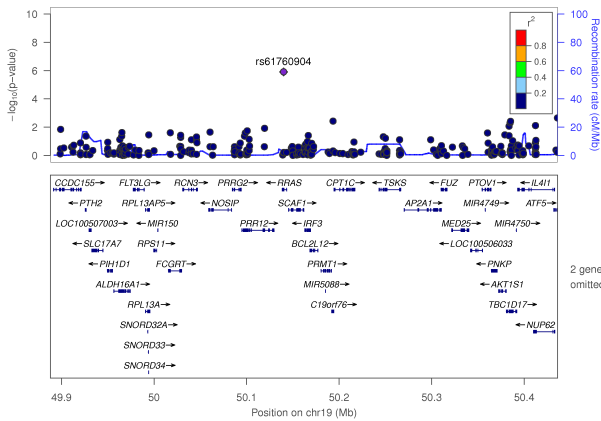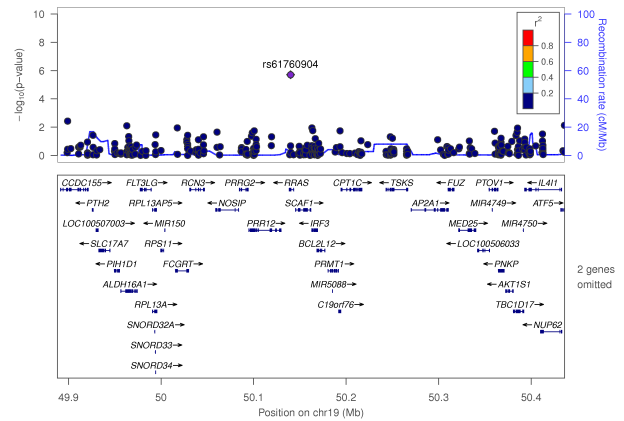

**Supplementary Figure 5. eQTL locus zoom plots.**

Regional association plots for the four novel BP loci that showed significant eQTL associations. The title shows the novel blood pressure associated variant and locus name. The novel BP associated variant is labelled in red and the most significant eQTL is labelled in green. Each circle represents the association of an eQTL with gene expression in either the MuTHER or GTeX data-set. LD ( $r^2$ ) that is shown on the plots was calculated using EUR 1000 Genomes hg19 March 2012 release data and colour coding indicates the LD between each variant and the BP variant (RefVariant) shown in purple. The figure caption shows the eQTL database in which look up was performed and the tissue. P-value (on a  $-\log_{10}$  scale) for association of variants with gene expression is shown on the axis and genomic position (NCBI Build 37) is shown on the x-axis.

# rs7302981 (*CERS5*)

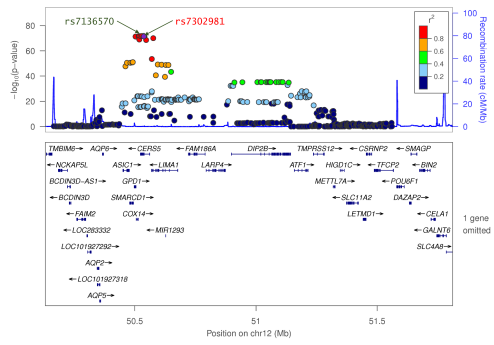

MuTHER - LCL

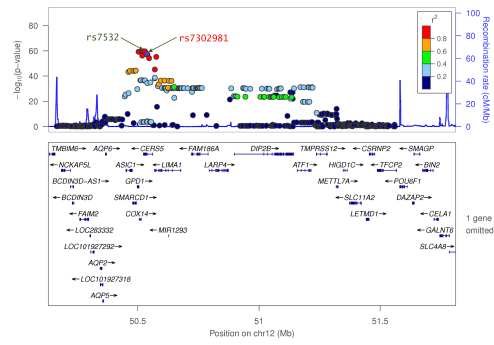

MuTHER - Skin

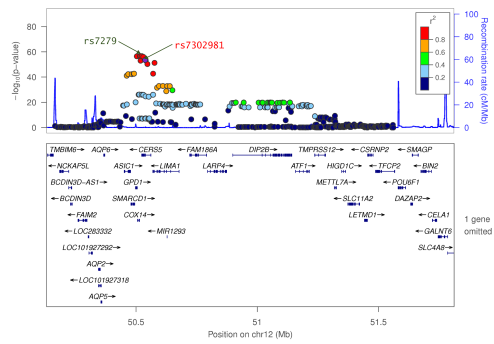

MuTHER - Adipose

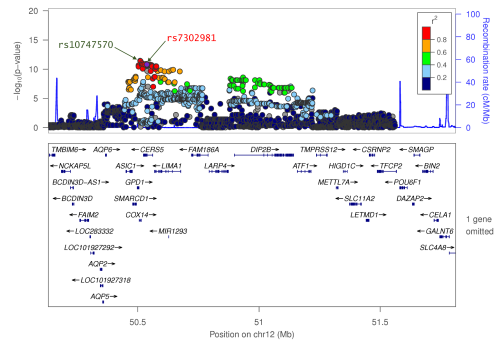

GTEx - Nerve (Tibial)

rs867186 (*PROCR*)

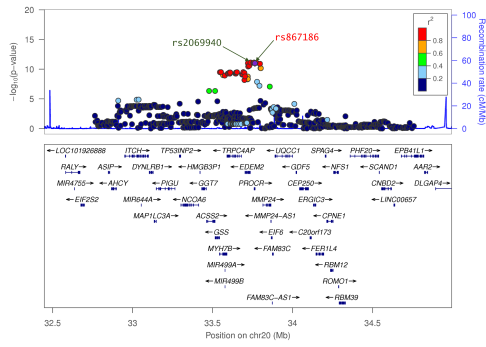

MuTHER - Skin

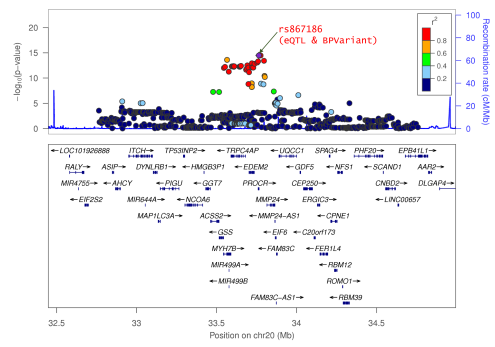

MuTHER - Adipose

# rs10407022 (AMH)

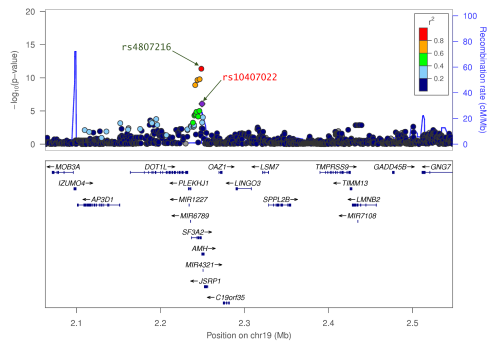

GTEX - Thyroid

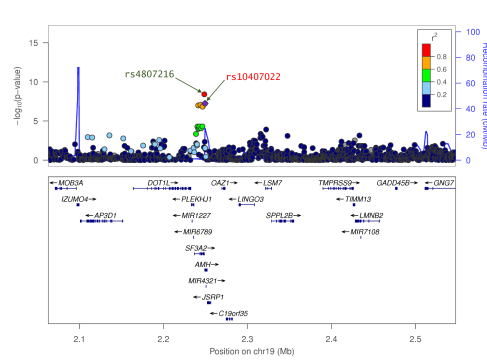

8: GTEX - Skin (Sun Exposed)

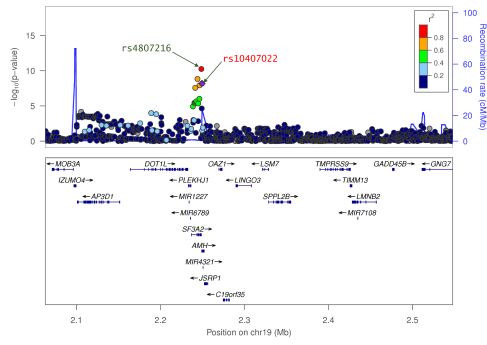

GTEX - Artery (Tibial)

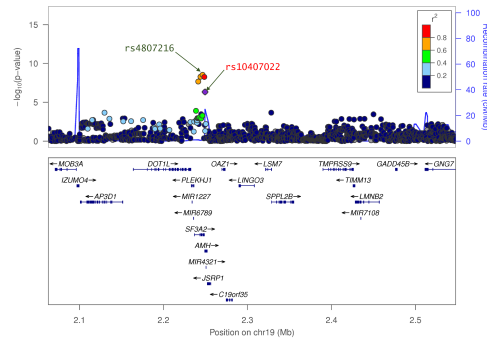

GTEX - Adipose (Subcutaneous)

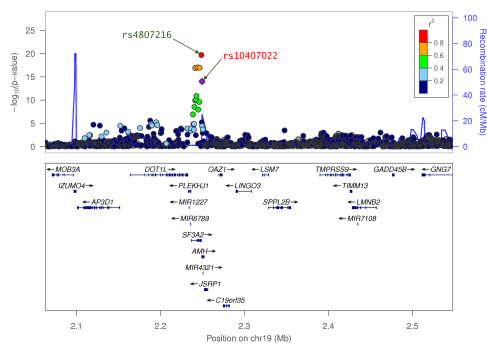

GTEX - Muscle (Skeletal)

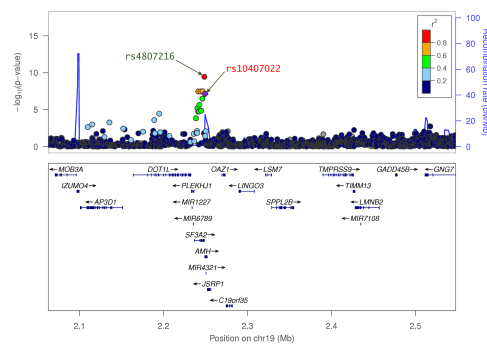

GTEX - Nerve (Tibial)

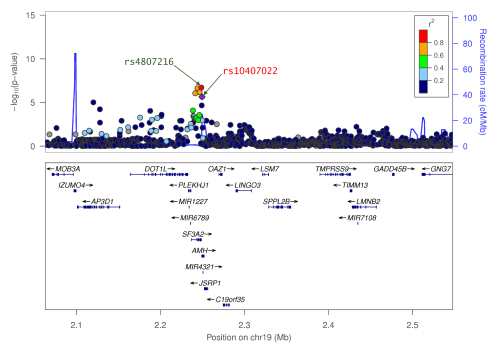

GTE<sub>x</sub> - Lung

rs4728142 (*IRF5*)

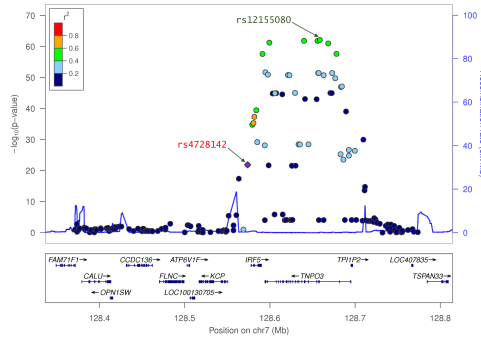

MuTHER - Skin

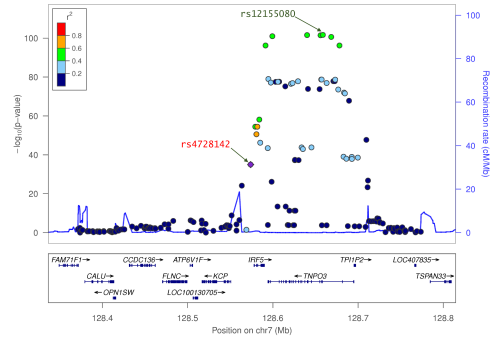

MuTHER - LCL

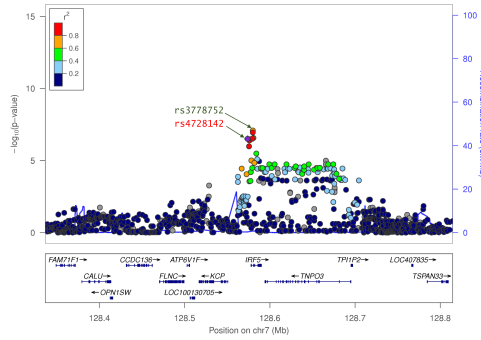

GTEx - Blood

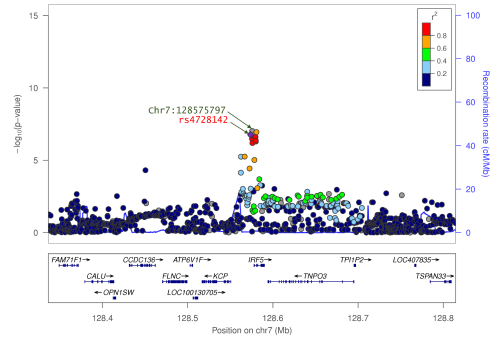

GTEx - Artery (Tibial)



### Supplementary Figure 6. MAF vs Effect Size.

For each of the three quantitative traits SBP, DBP and PP, the relationship of Minor Allele Frequency (MAF) (x-axis) vs Effect Size (mmHg per unit allele) (y-axis) is plotted for the 43 known (blue triangles) and 30 novel (red circles) SNVs according to results from untransformed analyses within EUR ancestry. For known SNVs effect estimates are from the discovery analyses and for novel SNVs effect estimates are from the independent replication analyses.

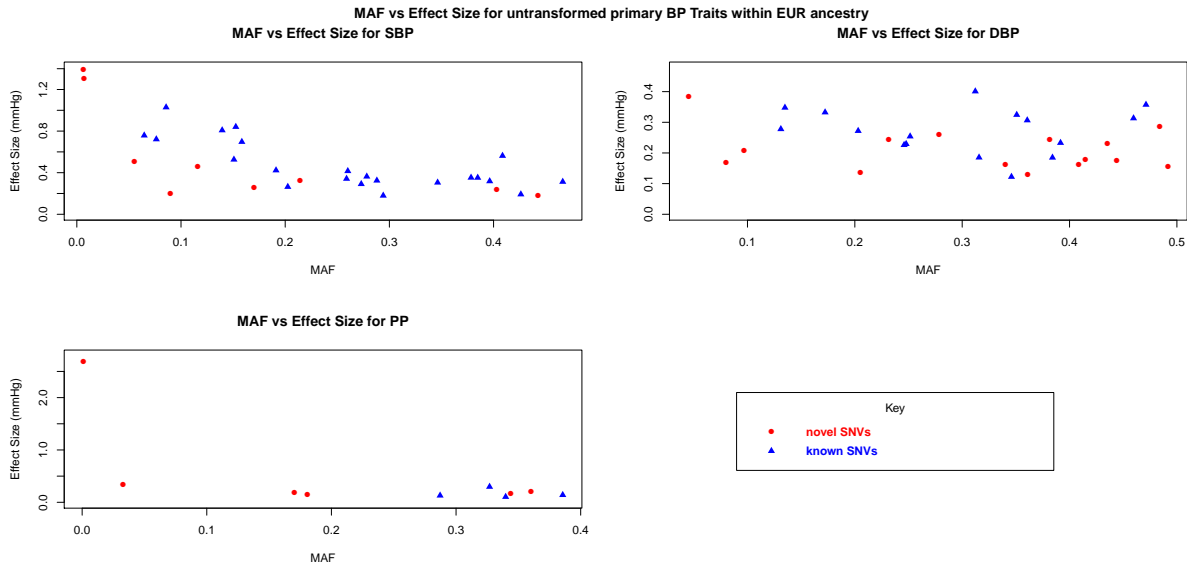

**Supplementary Figure 7. Quantile-quantile plots for the discovery meta-analyses of transformed SBP, DBP, PP and HTN.**

QQ plots showing the quantiles of the observed  $-\log_{10}(\text{P-value})$  distribution in the discovery meta-analyses (y-axis) against the expected  $-\log_{10}(\text{P-values})$  from the quantiles of the normal distribution. The black dashed line represents  $\lambda = 1$ , i.e. no inflation. The red dashed line indicates  $y = \lambda x$  and represents the inflation in the test statistics for the plotted data. For SBP, DBP and PP, the inflation factor,  $\lambda$ , is also reported for the untransformed results, which are not plotted.

SBP (transformed) in EUR-SAS discovery

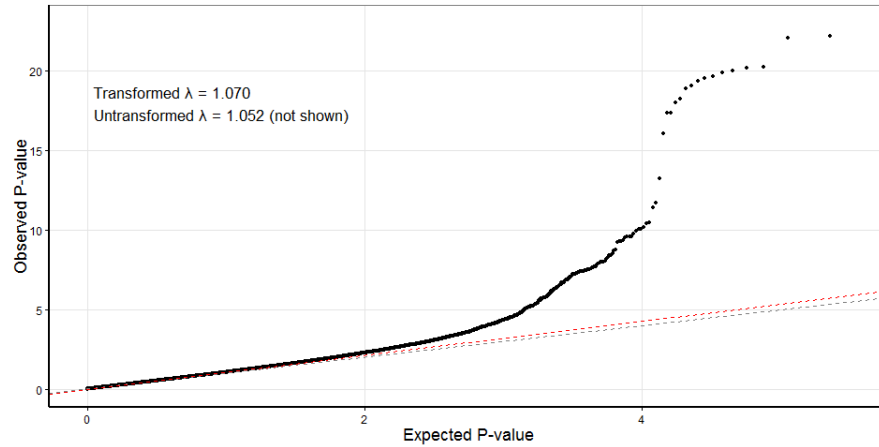

DBP (transformed) in EUR-SAS discovery

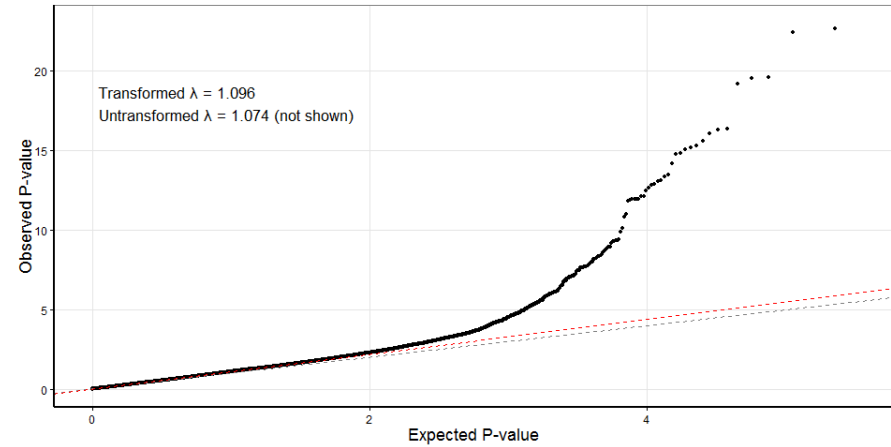

PP (transformed) in EUR-SAS discovery

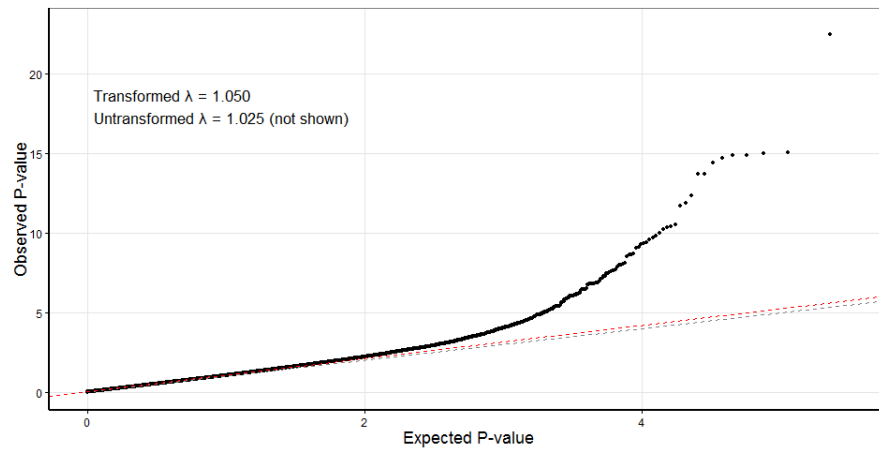

Hypertension in EUR-SAS discovery

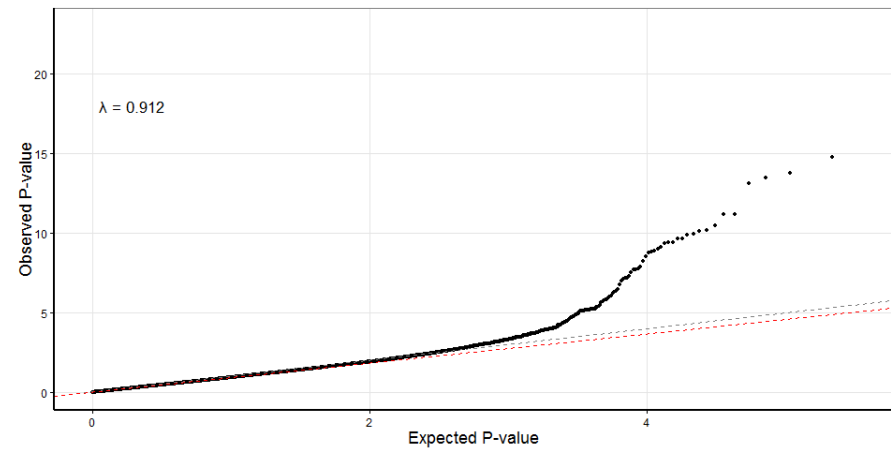

SBP (transformed) in EUR discovery

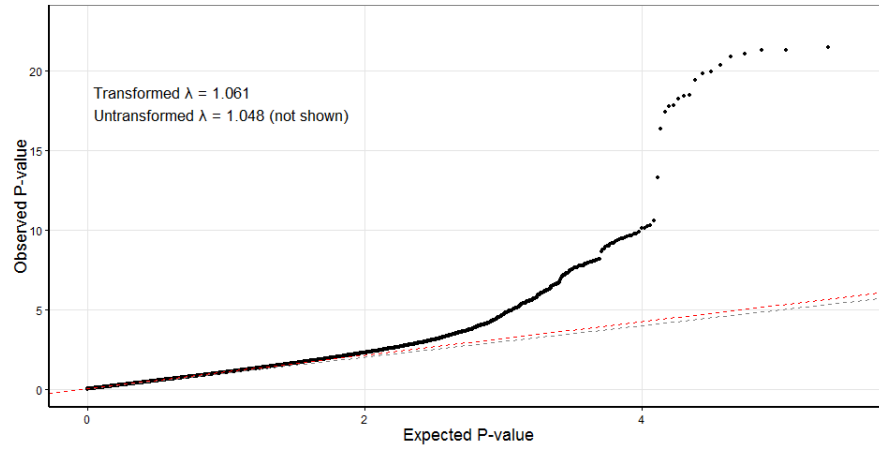

DBP (transformed) in EUR discovery

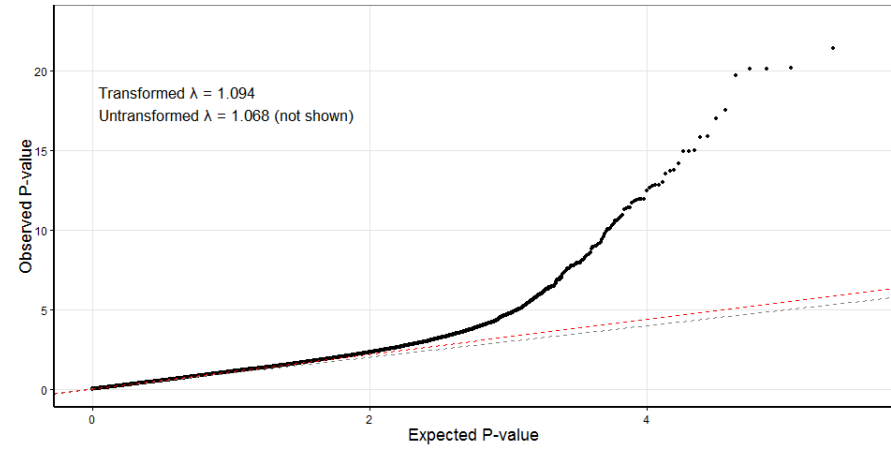

PP (transformed) in EUR discovery

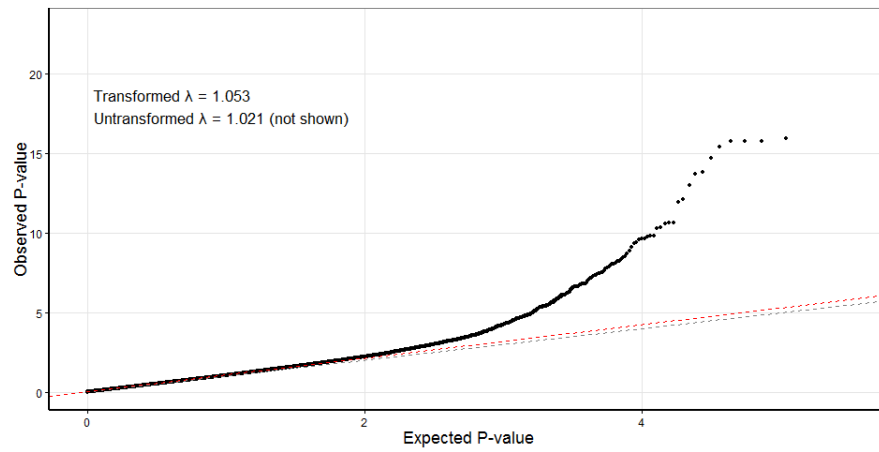

Hypertension in EUR discovery

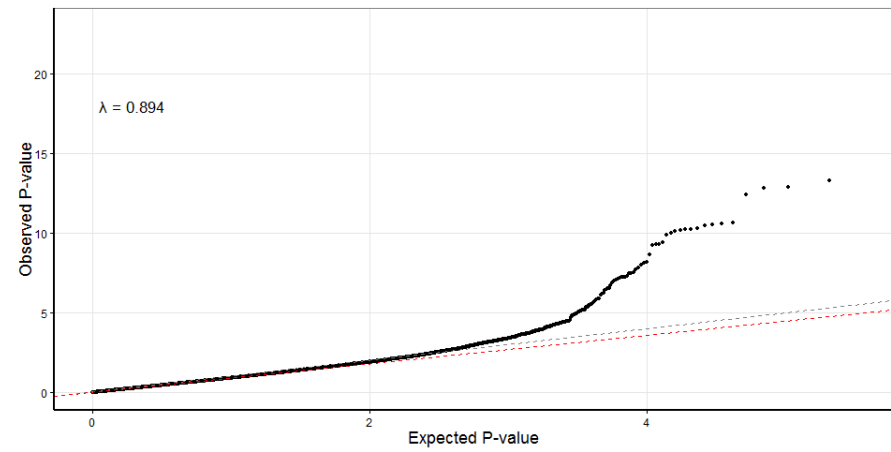

**Supplementary Figure 8. Quantile-Quantile Plots and Histograms of SBP, DBP and PP distributions in studies from the discovery and replication data.**

Figure showing the distribution of SBP, DBP and PP in A) EPIC study from CHD Exome+ consortium and B) ARIC and FHS studies from CHARGE+ consortium.

8A. CHD Exome+ consortia. EPIC

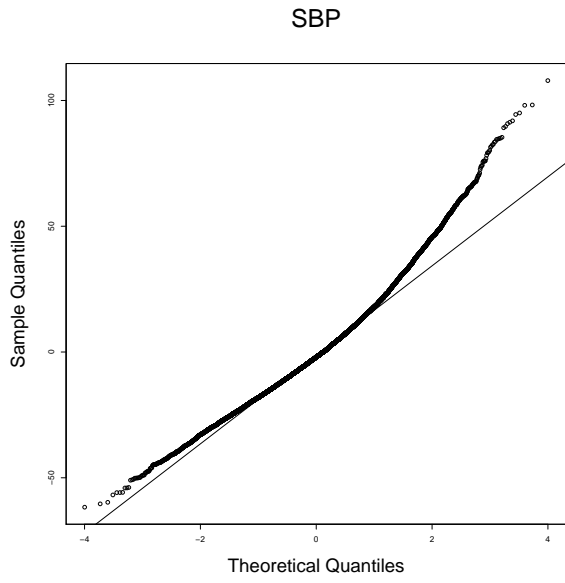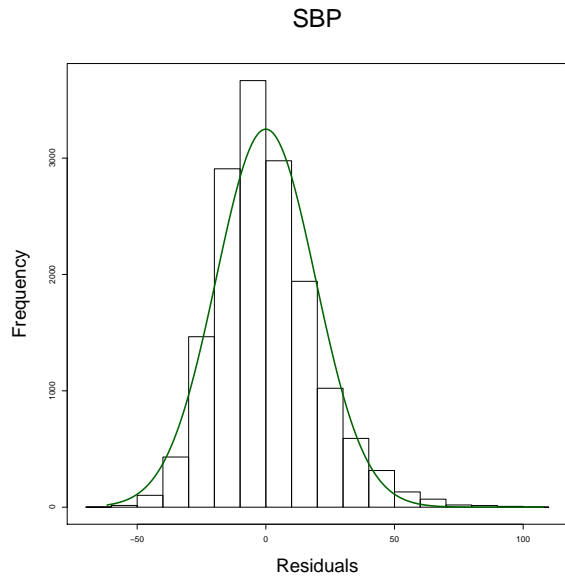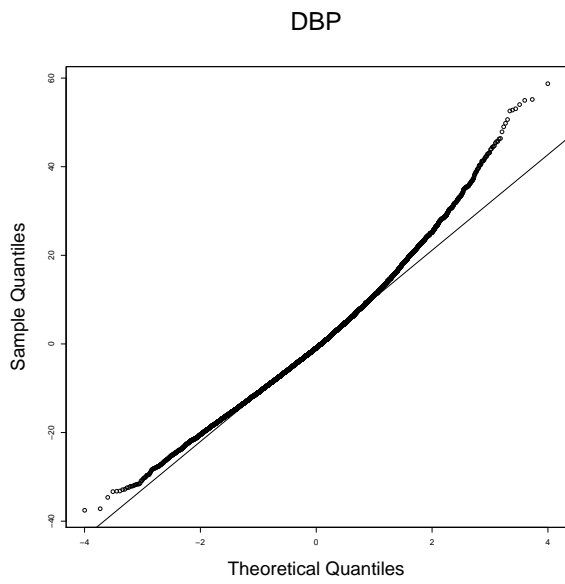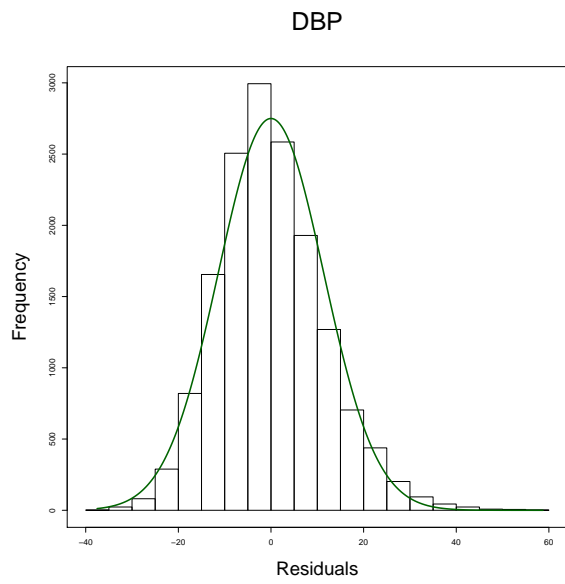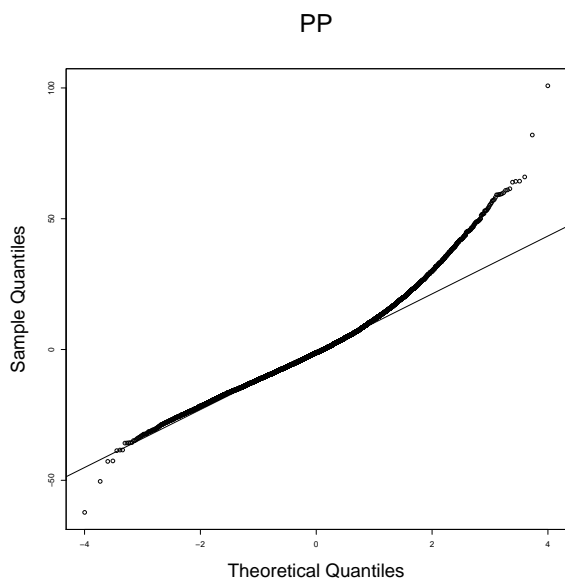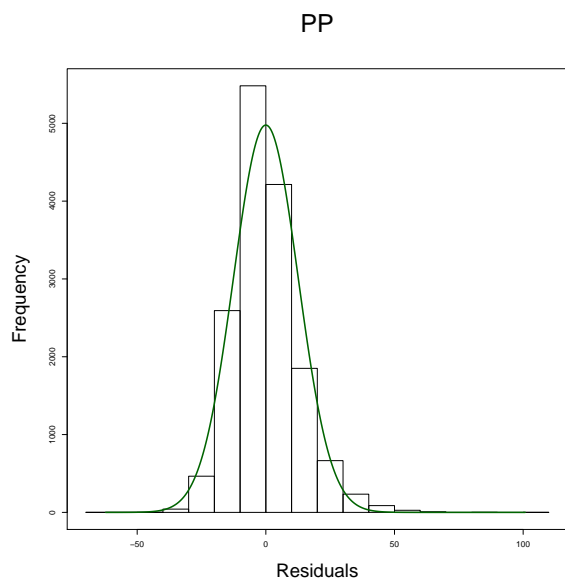

**8B. CHARGE+ consortia. ARIC (top two rows) and FHS (bottom two rows)**

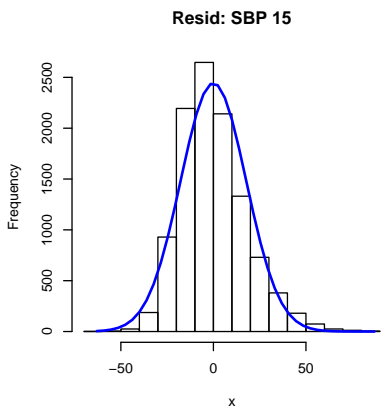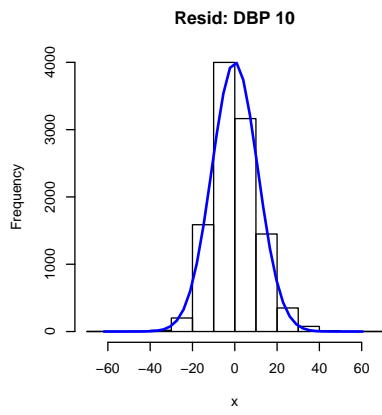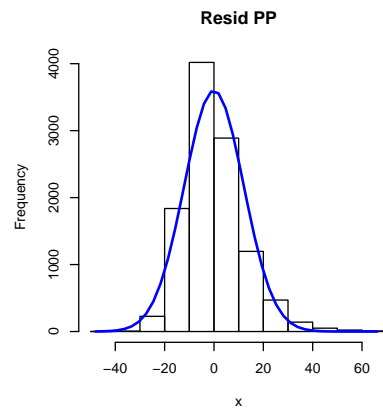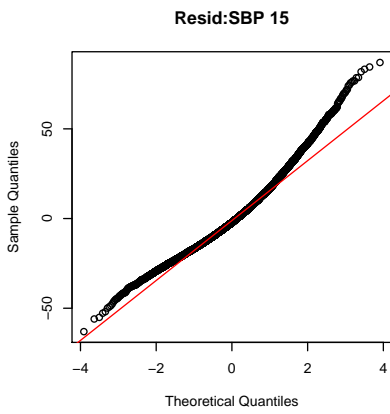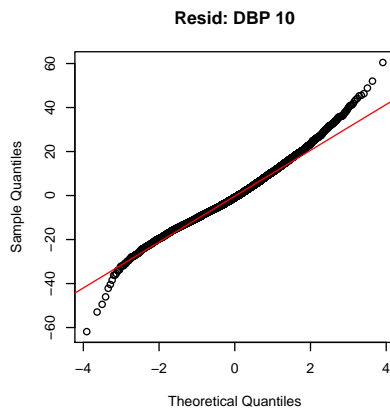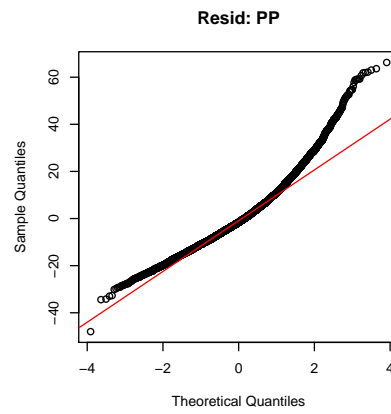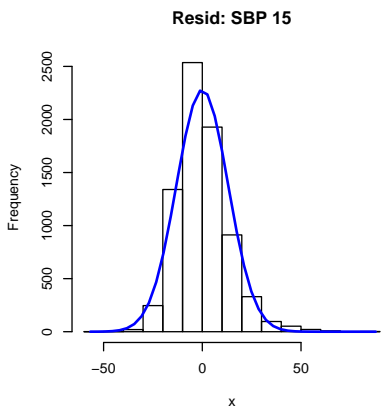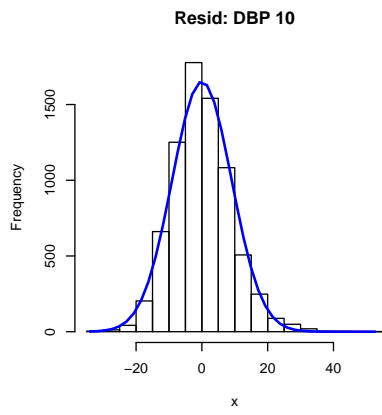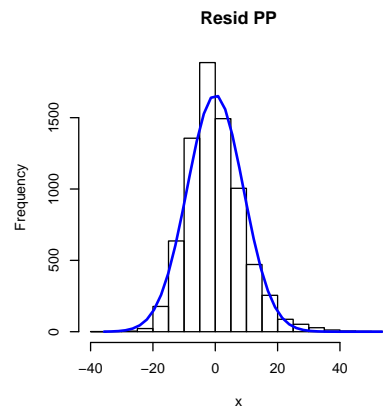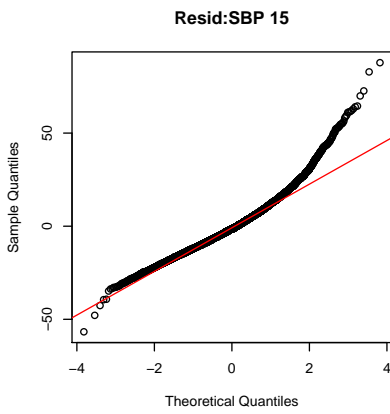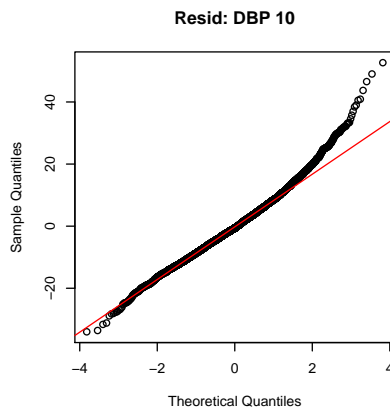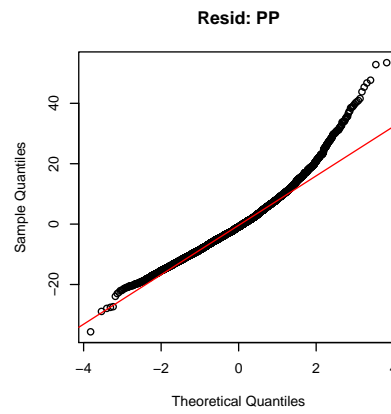

Supplement: NIHMS69533-supplement-Supplementary_Figures.pdf [file NIHMS69533-supplement-Supplementary_Figures.pdf]
